# Supplementary material for: Risk Analysis of Vehicle Rear-End Collisions at Intersections
Source: Hindawi journal article supplement (doi:10.1155/2020/2793150), 2020-07-01
Supplement: f1 [file 2793150.f1.zip]

Archive with 2 entries (2 files):
- 2793150.f1/Supplementary Material 1_RLC logit model.xlsx
- 2793150.f1/Supplementary Material 2_Rear-end Probability.xlsx
