# Supplementary material for: Risk Analysis of Vehicle Rear-End Collisions at Intersections
Source: Hindawi journal article supplement (doi:10.1155/2020/2793150), 2020-07-01
Supplement: f1 [file 2793150.f1.zip › 2793150.f1/Supplementary Material 1_RLC logit model.xlsx]

## Sheet: RLC model
Potential time	Lvyuan Road（RLC）	Anhong Road（Non-RLC）
0	0.00133166	0.0012184
0.1	0.00166627	0.00138676
0.2	0.00208479	0.00157834
0.3	0.00260816	0.00179635
0.4	0.00326248	0.00204441
0.5	0.00408028	0.00232664
0.6	0.00510204	0.00264773
0.7	0.00637801	0.003013
0.8	0.00797054	0.00342849
0.9	0.00995673	0.00390105
1	0.0124317	0.00443846
1.1	0.0155121	0.00504952
1.2	0.019341	0.00574422
1.3	0.0240917	0.00653387
1.4	0.0299738	0.00743127
1.5	0.0372372	0.00845086
1.6	0.0461768	0.009609
1.7	0.0571353	0.0109241
1.8	0.0705022	0.0124169
1.9	0.0867088	0.0141108
2	0.106215	0.0160321
2.1	0.129487	0.0182101
2.2	0.156963	0.0206778
2.3	0.189003	0.0234719
2.4	0.225832	0.0266333
2.5	0.267469	0.0302073
2.6	0.313674	0.034244
2.7	0.363895	0.0387986
2.8	0.417268	0.0439314
2.9	0.472652	0.0497082
3	0.528718	0.0561999
3.1	0.584069	0.0634827
3.2	0.637378	0.0716377
3.3	0.687509	0.08075
3.4	0.733607	0.0909079
3.5	0.775129	0.102201
3.6	0.811838	0.114721
3.7	0.843763	0.128555
3.8	0.871131	0.143785
3.9	0.894306	0.160488
4	0.913726	0.178726
4.1	0.929857	0.198547
4.2	0.94316	0.219977
4.3	0.954065	0.243019
4.4	0.96296	0.267646
4.5	0.970186	0.2938
4.6	0.976037	0.321388
4.7	0.980763	0.350282
4.8	0.984572	0.380318
4.9	0.987636	0.411299
5	0.990097	0.442999
5.1	0.992073	0.47517
5.2	0.993657	0.507549
5.3	0.994926	0.539865
5.4	0.995942	0.571849
5.5	0.996755	0.603244
5.6	0.997406	0.633811
5.7	0.997927	0.663337
5.8	0.998343	0.69164
5.9	0.998676	0.718574
6	0.998942	0.744026
6.1	0.999154	0.767919
6.2	0.999324	0.790211
6.3	0.99946	0.810889
6.4	0.999569	0.829968
6.5	0.999655	0.847484
6.6	0.999725	0.863492
6.7	0.99978	0.878062
6.8	0.999824	0.891272
6.9	0.99986	0.903209
7	0.999888	0.913962
7.1	0.99991	0.923621
7.2	0.999928	0.932277
7.3	0.999943	0.940015
7.4	0.999954	0.946919
7.5	0.999963	0.953069
7.6	0.999971	0.958537
7.7	0.999977	0.963392
7.8	0.999981	0.967698
7.9	0.999985	0.971513
8	0.999988	0.974889
8.1	0.999991	0.977873
8.2	0.999992	0.980511
8.3	0.999994	0.982839
8.4	0.999995	0.984893
8.5	0.999996	0.986705
8.6	0.999997	0.988302
8.7	0.999998	0.98971
8.8	0.999998	0.990949
8.9	0.999998	0.992041
9	0.999999	0.993001
9.1	0.999999	0.993847
9.2	0.999999	0.994591
9.3	0.999999	0.995245
9.4	0.999999	0.995821
9.5	1	0.996327
9.6	1	0.996772
9.7	1	0.997163
9.8	1	0.997507
9.9	1	0.997809
10	1	0.998075
10.1	1	0.998309
10.2	1	0.998514
10.3	1	0.998694
10.4	1	0.998853
10.5	1	0.998992
10.6	1	0.999115
10.7	1	0.999222
10.8	1	0.999317
10.9	1	0.9994
11	1	0.999473
11.1	1	0.999537
11.2	1	0.999593
11.3	1	0.999642
11.4	1	0.999686
11.5	1	0.999724
11.6	1	0.999758
11.7	1	0.999787
11.8	1	0.999813
11.9	1	0.999836
12	1	0.999856
12.1	1	0.999873
12.2	1	0.999889
12.3	1	0.999902
12.4	1	0.999914
12.5	1	0.999924
12.6	1	0.999934
12.7	1	0.999942
12.8	1	0.999949
12.9	1	0.999955
13	1	0.99996
13.1	1	0.999965
13.2	1	0.99997
13.3	1	0.999973
13.4	1	0.999976
13.5	1	0.999979
13.6	1	0.999982
13.7	1	0.999984
13.8	1	0.999986
13.9	1	0.999988
14	1	0.999989
