# Supplementary material for: Risk Analysis of Vehicle Rear-End Collisions at Intersections
Source: Hindawi journal article supplement (doi:10.1155/2020/2793150), 2020-07-01
Supplement: f1 [file 2793150.f1.zip › 2793150.f1/Supplementary Material 2_Rear-end Probability.xlsx]

## Sheet: 绿苑路-IID
停车											通过									安虹路停车		绿苑路停车							通过
								Abrupt stop
黄灯启亮时的速度	黄灯启亮时的距离	时间	最小停车距离Xc	最大通过距离Xo	有两难区吗？	正确决策	他的决策	结果			黄灯启亮时的速度	黄灯启亮时的距离	时间	最小停车距离Xc	最大通过距离Xo	有两难区吗？	正确决策	他的决策	结果			时间	车辆数	频率	累计频数	累计频率			时间	车辆数	频率	累计频数	累计频率
44.3077	18	1.4625	31.4004	36.9231	0	通过	停车	AS			60.6316	1	0.059375	55.6971	50.5263	1	通过	通过		0	0	0	0	0	0	0			0	0	0	0	0
19.2	8	1.5	7.40741	16	0	both ok	停车				54.8571	1	0.065625	46.319	45.7143	0	通过	通过		1	0	1	1	0.010101	1	0.020101			0	20	0.183486	20	0.183486
44.3077	22	1.7875	31.4004	36.9231	0	both ok	停车				82.2857	2	0.0875	98.5034	68.5714	1	通过	通过		2	0	2	3	0.030303	4	0.040404			1	49	0.449541	69	0.633028
39.7241	24	2.175	25.8105	33.1034	0	通过	停车	AS			76.8	2	0.09375	86.5185	64	1	通过	通过		3	0.05	3	13	0.131313	17	0.171717			2	16	0.146789	85	0.779817
46.08	33	2.57812	33.7067	38.4	0	通过	停车	AS			53.3333	2	0.135	43.9872	44.4444	0	通过	通过		4	0.4	4	21	0.212121	38	0.383838			3	15	0.137615	100	0.917431
59.3814	45	2.72813	53.5941	49.4845	1	通过	停车	AS			52.3636	2	0.1375	42.5344	43.6364	0	通过	通过		5	0.5	5	23	0.232323	61	0.616162			4	6	0.0550459	106	0.972477
64	49	2.75625	61.5638	53.3333	1	通过	停车	AS			64	3	0.16875	61.5638	53.3333	1	通过	通过		6	0.8	6	13	0.131313	74	0.747475			5	3	0.0275229	109	1
19.2	15	2.8125	7.40741	16	0	both ok	停车				57.6	3	0.1875	50.6667	48	1	通过	通过		7	0.85	7	11	0.111111	85	0.858586				109
41.1429	33	2.8875	27.483	34.2857	0	both ok	停车				57.6	3	0.1875	50.6667	48	1	通过	通过		8	0.95	8	8	0.0808081	93	0.939394
39.7241	32	2.9	25.8105	33.1034	0	both ok	停车				52.3636	3	0.20625	42.5344	43.6364	0	通过	通过		9	0.95	9	4	0.040404	97	0.979798
57.6	50	3.125	50.6667	48	1	通过	停车	AS			50.087	3	0.215625	39.2187	41.7391	0	通过	通过		10	0.95	10	0	0	97	0.979798			Type II 2.89-7.94 秒					85%;Type II: 2.5-6.9秒
57.6	51	3.1875	50.6667	48	1	停车	停车				54.8571	4	0.2625	46.319	45.7143	0	通过	通过		11	0.95	11	2	0.020202	99	1
54.8571	49	3.21563	46.319	45.7143	0	停车	停车				54.8571	4	0.2625	46.319	45.7143	0	通过	通过		12	1	12	99	1		1
54.8571	50	3.28125	46.319	45.7143	0	停车	停车				52.3636	4	0.275	42.5344	43.6364	0	通过	通过
50.087	47	3.37812	39.2187	41.7391	0	停车	停车				50.087	4	0.2875	39.2187	41.7391	0	通过	通过
52.3636	50	3.4375	42.5344	43.6364	0	停车	停车				52.3636	5	0.34375	42.5344	43.6364	0	通过	通过
48	46	3.45	36.2963	40	0	停车	停车				54.8571	6	0.39375	46.319	45.7143	0	通过	通过
67.7647	66	3.50625	68.466	56.4706	1	停车	停车				52.3636	6	0.4125	42.5344	43.6364	0	通过	通过
46.08	45	3.51563	33.7067	38.4	0	停车	停车				64	8	0.45	61.5638	53.3333	1	通过	通过
48	49	3.675	36.2963	40	0	停车	停车				60.6316	8	0.475	55.6971	50.5263	1	通过	通过
33.8824	35	3.71875	19.4694	28.2353	0	停车	停车				57.6	8	0.5	50.6667	48	1	通过	通过
46.08	49	3.82813	33.7067	38.4	0	停车	停车				57.6	10	0.625	50.6667	48	1	通过	通过
57.6	62	3.875	50.6667	48	1	停车	停车				33.8824	6	0.6375	19.4694	28.2353	0	通过	通过
44.3077	48	3.9	31.4004	36.9231	0	停车	停车				76.8	14	0.65625	86.5185	64	1	通过	通过
54.8571	60	3.9375	46.319	45.7143	0	停车	停车				54.8571	10	0.65625	46.319	45.7143	0	通过	通过
57.6	63	3.9375	50.6667	48	1	停车	停车				96	18	0.675	131.852	80	1	通过	通过
42.6667	47	3.96563	29.337	35.5556	0	停车	停车				41.1429	8	0.7	27.483	34.2857	0	通过	通过
71.1111	79	3.99938	74.9073	59.2593	1	停车	停车				76.8	15	0.703125	86.5185	64	1	通过	通过
36	40	4	21.6667	30	0	停车	停车				60.6316	12	0.7125	55.6971	50.5263	1	通过	通过
54.8571	61	4.00312	46.319	45.7143	1	停车	停车				82.2857	17	0.74375	98.5034	68.5714	1	通过	通过
57.6	65	4.0625	50.6667	48	1	停车	停车				96	20	0.75	131.852	80	1	通过	通过
57.6	66	4.125	50.6667	48	1	停车	停车				48	10	0.75	36.2963	40	0	通过	通过
54.8571	63	4.13438	46.319	45.7143	0	停车	停车				72	15	0.75	76.6667	60	1	通过	通过
41.1429	49	4.2875	27.483	34.2857	0	停车	停车				71.1111	15	0.759375	74.9073	59.2593	1	通过	通过
64	77	4.33125	61.5638	53.3333	1	停车	停车				46.08	10	0.78125	33.7067	38.4	0	通过	通过
41.1429	50	4.375	27.483	34.2857	0	停车	停车				64	14	0.7875	61.5638	53.3333	1	通过	通过
54.8571	67	4.39687	46.319	45.7143	0	停车	停车				76.8	17	0.796875	86.5185	64	1	通过	通过
65.4545	81	4.455	64.1873	54.5455	1	停车	停车				76.8	17	0.796875	86.5185	64	1	通过	通过
57.6	72	4.5	50.6667	48	1	停车	停车				72	16	0.8	76.6667	60	1	通过	通过
42.6667	54	4.55625	29.337	35.5556	0	停车	停车				57.6	13	0.8125	50.6667	48	1	通过	通过
58.7755	75	4.59375	52.5892	48.9796	1	停车	停车				64.7191	15	0.834375	62.854	53.9326	1	通过	通过
54.8571	70	4.59375	46.319	45.7143	0	停车	停车				42.6667	10	0.84375	29.337	35.5556	0	通过	通过
50.087	66	4.74375	39.2187	41.7391	0	停车	停车				72	17	0.85	76.6667	60	1	通过	通过
64	85	4.78125	61.5638	53.3333	1	停车	停车				67.7647	16	0.85	68.466	56.4706	1	通过	通过
60	80	4.8	54.6296	50	1	停车	停车				60	15	0.9	54.6296	50	1	通过	通过
57.6	77	4.8125	50.6667	48	1	停车	停车				67.7647	17	0.903125	68.466	56.4706	1	通过	通过
60.6316	82	4.86875	55.6971	50.5263	1	停车	停车				76.8	20	0.9375	86.5185	64	1	通过	通过
48	65	4.875	36.2963	40	0	停车	停车				57.0297	15	0.946875	49.7468	47.5248	1	通过	通过
57.6	78	4.875	50.6667	48	1	停车	停车				60.6316	16	0.95	55.6971	50.5263	1	通过	通过
36	49	4.9	21.6667	30	0	停车	停车				37.1613	10	0.96875	22.9206	30.9677	0	通过	通过
36.4557	50	4.9375	22.1546	30.3797	0	停车	停车				57.6	16	1	50.6667	48	1	通过	通过
48	66	4.95	36.2963	40	0	停车	停车				60.6316	17	1.00937	55.6971	50.5263	1	通过	通过
48	66	4.95	36.2963	40	0	停车	停车				52.3636	15	1.03125	42.5344	43.6364	0	通过	通过
41.1429	58	5.075	27.483	34.2857	0	停车	停车				52.3636	15	1.03125	42.5344	43.6364	0	通过	通过
60.6316	88	5.225	55.6971	50.5263	1	停车	停车				82.2857	24	1.05	98.5034	68.5714	1	通过	通过
52.3636	76	5.225	42.5344	43.6364	0	停车	停车				60.6316	18	1.06875	55.6971	50.5263	1	通过	通过
41.1429	60	5.25	27.483	34.2857	0	停车	停车				50.087	15	1.07812	39.2187	41.7391	0	通过	通过
54.8571	80	5.25	46.319	45.7143	0	停车	停车				57.6	18	1.125	50.6667	48	1	通过	通过
54.8571	82	5.38125	46.319	45.7143	0	停车	停车				64	20	1.125	61.5638	53.3333	1	通过	通过
39.7241	60	5.4375	25.8105	33.1034	0	停车	停车				46.08	15	1.17188	33.7067	38.4	0	通过	通过
54.8571	83	5.44687	46.319	45.7143	0	停车	停车				67.7647	23	1.22188	68.466	56.4706	1	通过	通过
52.3636	80	5.5	42.5344	43.6364	0	停车	停车				52.3636	18	1.2375	42.5344	43.6364	0	通过	通过
41.1429	63	5.5125	27.483	34.2857	0	停车	停车				57.6	20	1.25	50.6667	48	1	通过	通过
54.8571	86	5.64375	46.319	45.7143	0	停车	停车				96	35	1.3125	131.852	80	1	通过	通过
41.1429	65	5.6875	27.483	34.2857	0	停车	停车				52.3636	20	1.375	42.5344	43.6364	0	通过	通过
37.1613	60	5.8125	22.9206	30.9677	0	停车	停车				57.6	22	1.375	50.6667	48	1	通过	通过
53.8318	87	5.81813	44.7434	44.8598	0	停车	停车				82.2857	32	1.4	98.5034	68.5714	1	通过	通过
52.3636	87	5.98125	42.5344	43.6364	0	停车	停车				54.8571	22	1.44375	46.319	45.7143	0	通过	通过
46.08	78	6.09375	33.7067	38.4	0	停车	停车				82.2857	33	1.44375	98.5034	68.5714	1	通过	通过
47.6033	82	6.20125	35.7535	39.6694	0	停车	停车				72	31	1.55	76.6667	60	1	通过	通过
46.08	80	6.25	33.7067	38.4	0	停车	停车				64	30	1.6875	61.5638	53.3333	1	通过	通过
28.0976	49	6.27812	14.0551	23.4146	0	停车	停车				70.2439	33	1.69125	73.2104	58.5366	1	通过	通过
48	84	6.3	36.2963	40	0	停车	停车				72	36	1.8	76.6667	60	1	通过	通过
38.4	68	6.375	24.2963	32	0	停车	停车				96	48	1.8	131.852	80	1	通过	通过
28.0976	51	6.53438	14.0551	23.4146	0	停车	停车				72	38	1.9	76.6667	60	1	通过	通过
32.9143	60	6.5625	18.5034	27.4286	0	停车	停车				60.6316	33	1.95937	55.6971	50.5263	1	通过	通过
44.3077	83	6.74375	31.4004	36.9231	0	停车	停车				88.6154	49	1.99062	113.294	73.8462	1	通过	通过
42.6667	80	6.75	29.337	35.5556	0	停车	停车				57.6	32	2	50.6667	48	1	通过	通过
41.7391	80	6.9	28.2014	34.7826	0	停车	停车				96	56	2.1	131.852	80	1	通过	通过
44.3077	86	6.9875	31.4004	36.9231	0	停车	停车				82.2857	52	2.275	98.5034	68.5714	1	通过	通过
33.8824	66	7.0125	19.4694	28.2353	0	停车	停车				76.8	49	2.29688	86.5185	64	1	通过	通过
46.08	90	7.03125	33.7067	38.4	0	停车	停车				52.3636	34	2.3375	42.5344	43.6364	0	通过	通过
46.08	90	7.03125	33.7067	38.4	0	停车	停车				67.7647	45	2.39062	68.466	56.4706	1	通过	通过
37.1613	74	7.16875	22.9206	30.9677	0	停车	停车				74.8052	50	2.40625	82.3523	62.3377	1	通过	通过
44.6512	90	7.25625	31.841	37.2093	0	停车	停车				72	49	2.45	76.6667	60	1	通过	通过
39.7241	84	7.6125	25.8105	33.1034	0	停车	停车				67.7647	49	2.60313	68.466	56.4706	1	通过	通过
38.4	84	7.875	24.2963	32	0	停车	停车				64	47	2.64375	61.5638	53.3333	1	通过	通过
20.5714	45	7.875	8.29932	17.1429	0	停车	停车				67.7647	50	2.65625	68.466	56.4706	1	通过	通过
37.1613	82	7.94375	22.9206	30.9677	0	停车	停车				60.6316	46	2.73125	55.6971	50.5263	1	通过	通过
29.5385	66	8.04375	15.3233	24.6154	0	停车	停车				64	49	2.75625	61.5638	53.3333	1	通过	通过
39.7241	90	8.15625	25.8105	33.1034	0	停车	停车				84.7059	65	2.7625	104.037	70.5882	1	通过	通过
37.1613	85	8.23437	22.9206	30.9677	0	停车	停车				64.7191	51	2.83688	62.854	53.9326	1	通过	通过
34.9091	80	8.25	20.5204	29.0909	0	停车	停车				57.6	46	2.875	50.6667	48	1	通过	通过
37.1613	89	8.62187	22.9206	30.9677	0	停车	停车				60.6316	50	2.96875	55.6971	50.5263	1	DZ	通过	WP
32	80	9	17.6132	26.6667	0	停车	停车				61.9355	52	3.0225	57.9335	51.6129	1	通过	通过
34.9091	90	9.28125	20.5204	29.0909	0	停车	停车				88.6154	82	3.33125	113.294	73.8462	1	DZ	通过	WP
34.491	90	9.39375	20.0892	28.7425	0	停车	停车				52.3636	49	3.36875	42.5344	43.6364	0	停车	通过	WP
22.5882	66	10.5187	9.69883	18.8235	0	停车	停车				72	68	3.4	76.6667	60	1	DZ	通过	WP
27.4286	81	10.6313	13.4845	22.8571	0	停车	停车				63.2967	60	3.4125	60.3148	52.7473	1	停车	通过	WP
											64	62	3.4875	61.5638	53.3333	1	停车	通过	WP
											50.087	49	3.52188	39.2187	41.7391	0	停车	通过	WP
											50.087	50	3.59375	39.2187	41.7391	0	停车	通过	WP
											64	66	3.7125	61.5638	53.3333	1	停车	通过	WP
											76.8	80	3.75	86.5185	64	1	DZ	通过	WP
											81.1268	90	3.99375	95.9069	67.6056	1	DZ	通过	WP
											57.6	65	4.0625	50.6667	48	1	停车	通过	WP
											50.087	65	4.67187	39.2187	41.7391	0	停车	通过	WP
											50.9735	67	4.73187	40.4939	42.4779	0	停车	通过	WP
											48	72	5.4	36.2963	40	0	停车	通过	WP
																			14	5

## Sheet: 安虹路IID
停止										通过											停车							通过
速度	距离	时间	最小停车距离Xc	最大通过距离Xo	有两难区吗？	正确决策	他的决策	结果		速度	距离	时间	最小停车距离Xc	最大通过距离Xo	有两难区吗？	正确决策	他的决策	结果			时间	车辆数	频率	累计频数	累计频率			时间	车辆数	频率	累计频数	累计频率
72.9114	66	3.25875	78.4917	60.7595	1	DZ	停车	AS		41.1429	1	0.0875	27.483	34.2857	0	通过	通过	DZ			0	0	0	0	0			0	16	0.112676	16	0.112676
64	66	3.7125	61.5638	53.3333	1	停车	停车			41.1429	1	0.0875	27.483	34.2857	0	通过	通过				1	0	0	0	0			1	24	0.169014	40	0.28169
75.7895	80	3.8	84.3952	63.1579	1	DZ	停车	AS		54.3396	2	0.1325	45.5204	45.283	1	通过	通过				2	0	0	0	0			2	41	0.288732	81	0.570423
54.8571	60	3.9375	46.319	45.7143	0	停车	停车			44.3077	2	0.1625	31.4004	36.9231	0	通过	通过				3	1	0.05	1	0.05			3	41	0.288732	122	0.859155
41.4388	46	3.99625	27.8384	34.5324	1	停车	停车			64	3	0.16875	61.5638	53.3333	1	通过	通过				4	7	0.35	8	0.4			4	13	0.0915493	135	0.950704
54.8571	62	4.06875	46.319	45.7143	0	停车	停车			60	3	0.18	54.6296	50	1	通过	通过				5	2	0.1	10	0.5			5	3	0.0211268	138	0.971831
52.844	63	4.29187	43.2511	44.0367	0	停车	停车			57.0297	3	0.189375	49.7468	47.5248	1	通过	通过				6	6	0.3	16	0.8			6	2	0.0140845	140	0.985915
54.3396	67	4.43875	45.5204	45.283	1	停车	停车			60.6316	4	0.2375	55.6971	50.5263	1	通过	通过				7	1	0.05	17	0.85			7	2	0.0140845	142	1
53.8318	75	5.01563	44.7434	44.8598	0	停车	停车			57.6	4	0.25	50.6667	48	1	通过	通过				8	2	0.1	19	0.95				142	1
56.4706	82	5.2275	48.853	47.0588	1	停车	停车			42.6667	3	0.253125	29.337	35.5556	0	通过	通过				9	0	0	19	0.95
54.8571	84	5.5125	46.319	45.7143	0	停车	停车			48	4	0.3	36.2963	40	0	通过	通过				10	0	0	19	0.95
40	64	5.76	26.1317	33.3333	0	停车	停车			60.6316	7	0.415625	55.6971	50.5263	1	通过	通过				11	0	0	19	0.95
48	77	5.775	36.2963	40	0	停车	停车			57.6	7	0.4375	50.6667	48	1	通过	通过				12	1	0.05	20	1
51.8919	86	5.96625	41.8364	43.2432	0	停车	停车			64	8	0.45	61.5638	53.3333	1	通过	通过					20	1						90%;Type II: 3.71-7.97 秒					85%;Type II: 2.9-7 秒
25.8296	43	5.99312	12.1673	21.5247	0	停车	停车			76.8	10	0.46875	86.5185	64	1	通过	通过
48	85	6.375	36.2963	40	0	停车	停车			37.1613	5	0.484375	22.9206	30.9677	0	通过	通过
38.6577	79	7.35688	24.5875	32.2148	0	停车	停车			57.6	8	0.5	50.6667	48	1	通过	通过
38.4	85	7.96875	24.2963	32	0	停车	停车			47.2131	7	0.53375	35.2235	39.3443	0	通过	通过
38.4	86	8.0625	24.2963	32	0	停车	停车			52.3636	8	0.55	42.5344	43.6364	0	通过	通过
24.5106	82	12.0438	11.1302	20.4255	0	停车	停车			44.3077	7	0.56875	31.4004	36.9231	0	通过	通过
										57.6	10	0.625	50.6667	48	1	通过	通过
										57.6	10	0.625	50.6667	48	1	通过	通过
										67.7647	15	0.796875	68.466	56.4706	1	通过	通过
										44.3077	10	0.8125	31.4004	36.9231	0	通过	通过
										60.6316	15	0.890625	55.6971	50.5263	1	通过	通过
										48	12	0.9	36.2963	40	0	通过	通过
										50.087	13	0.934375	39.2187	41.7391	0	通过	通过
										67.7647	18	0.95625	68.466	56.4706	1	通过	通过
										60.6316	17	1.00937	55.6971	50.5263	1	通过	通过
										64	18	1.0125	61.5638	53.3333	1	通过	通过
										48	14	1.05	36.2963	40	0	通过	通过
										57.6	17	1.0625	50.6667	48	1	通过	通过
										57.6	17	1.0625	50.6667	48	1	通过	通过
										51.4286	17	1.19	41.1565	42.8571	0	通过	通过
										68.5714	23	1.2075	69.9924	57.1429	1	通过	通过
										43.3083	15	1.24688	30.1355	36.0902	0	通过	通过
										48	18	1.35	36.2963	40	0	通过	通过
										50.087	19	1.36562	39.2187	41.7391	0	通过	通过
										60.6316	24	1.425	55.6971	50.5263	1	通过	通过
										42.6667	17	1.43438	29.337	35.5556	0	通过	通过
										67.7647	29	1.54063	68.466	56.4706	1	通过	通过
										46.08	20	1.5625	33.7067	38.4	0	通过	通过
										52.3636	23	1.58125	42.5344	43.6364	0	通过	通过
										57.6	26	1.625	50.6667	48	1	通过	通过
										44.3077	20	1.625	31.4004	36.9231	0	通过	通过
										39.7241	18	1.63125	25.8105	33.1034	0	通过	通过
										74.8052	34	1.63625	82.3523	62.3377	1	通过	通过
										52.3636	24	1.65	42.5344	43.6364	0	通过	通过
										62.6087	30	1.725	59.1052	52.1739	1	通过	通过
										44.3077	22	1.7875	31.4004	36.9231	0	通过	通过
										47.2131	24	1.83	35.2235	39.3443	0	通过	通过
										69.3976	36	1.8675	71.573	57.8313	1	通过	通过
										64.7191	34	1.89125	62.854	53.9326	1	通过	通过
										62.6087	33	1.8975	59.1052	52.1739	1	通过	通过
										64	34	1.9125	61.5638	53.3333	1	通过	通过
										57.6	31	1.9375	50.6667	48	1	通过	通过
										61.2766	33	1.93875	56.7979	51.0638	1	通过	通过
										68.5714	37	1.9425	69.9924	57.1429	1	通过	通过
										73.8462	40	1.95	80.3857	61.5385	1	通过	通过
										65.4545	36	1.98	64.1873	54.5455	1	通过	通过
										49.6552	28	2.03	38.6048	41.3793	0	通过	通过
										88.6154	50	2.03125	113.294	73.8462	1	通过	通过
										65.4545	38	2.09	64.1873	54.5455	1	通过	通过
										78.9041	46	2.09875	91.024	65.7534	1	通过	通过
										54.8571	32	2.1	46.319	45.7143	0	通过	通过
										88.6154	52	2.1125	113.294	73.8462	1	通过	通过
										57.6	34	2.125	50.6667	48	1	通过	通过
										57.6	34	2.125	50.6667	48	1	通过	通过
										60.6316	36	2.1375	55.6971	50.5263	1	通过	通过
										82.2857	50	2.1875	98.5034	68.5714	1	通过	通过
										57.6	36	2.25	50.6667	48	1	通过	通过
										50.9735	32	2.26	40.4939	42.4779	0	通过	通过
										76.8	49	2.29688	86.5185	64	1	通过	通过
										76.8	49	2.29688	86.5185	64	1	通过	通过
										48	31	2.325	36.2963	40	0	通过	通过
										55.3846	36	2.34	47.14	46.1538	1	通过	通过
										70.2439	46	2.3575	73.2104	58.5366	1	通过	通过
										76.8	51	2.39062	86.5185	64	1	通过	通过
										82.2857	56	2.45	98.5034	68.5714	1	通过	通过
										48.4034	33	2.45437	36.8524	40.3361	0	通过	通过
										49.6552	34	2.465	38.6048	41.3793	0	通过	通过
										46.08	32	2.5	33.7067	38.4	0	通过	通过
										80	56	2.52	93.4156	66.6667	1	通过	通过
										68.5714	49	2.5725	69.9924	57.1429	1	通过	通过
										46.08	33	2.57812	33.7067	38.4	0	通过	通过
										46.08	33	2.57812	33.7067	38.4	0	通过	通过
										67.7647	49	2.60312	68.466	56.4706	1	通过	通过
										66.9767	49	2.63375	66.9912	55.814	1	通过	通过
										64	47	2.64375	61.5638	53.3333	1	通过	通过
										54.8571	41	2.69062	46.319	45.7143	10	通过	通过
										50.087	38	2.73125	39.2187	41.7391	0	通过	通过
										64	49	2.75625	61.5638	53.3333	1	通过	通过
										69.3976	54	2.80125	71.573	57.8313	1	通过	通过
										64	50	2.8125	61.5638	53.3333	1	通过	通过
										57.6	45	2.8125	50.6667	48	1	通过	通过
										71.1111	56	2.835	74.9073	59.2593	1	通过	通过
										42.6667	34	2.86875	29.337	35.5556	0	通过	通过
										59.3814	48	2.91	53.5941	49.4845	1	通过	通过
										82.2857	67	2.93125	98.5034	68.5714	1	通过	通过
										57.6	47	2.9375	50.6667	48	1	通过	通过
										57.6	47	2.9375	50.6667	48	1	通过	通过
										60	49	2.94	54.6296	50	1	通过	通过
										72	59	2.95	76.6667	60	1	通过	通过
										62.6087	52	2.99	59.1052	52.1739	1	通过	通过
										19.2	16	3	7.40741	16	0	通过	通过
										48	40	3	36.2963	40	0	通过	通过
										77.8378	65	3.00625	88.7266	64.8649	1	通过	通过
										78.9041	66	3.01125	91.024	65.7534	1	通过	通过
										47.6033	40	3.025	35.7535	39.6694	0	通过	通过
										78.9041	67	3.05688	91.024	65.7534	1	DZ	通过	WP
										83.4783	72	3.105	101.211	69.5652	1	DZ	通过	WP
										92.9032	83	3.21625	123.899	77.4194	1	DZ	通过	WP
										70.2439	63	3.22875	73.2104	58.5366	1	DZ	通过	WP
										50.087	45	3.23438	39.2187	41.7391	0	停车	通过	WP
										64	58	3.2625	61.5638	53.3333	1	DZ	通过	WP
										53.8318	49	3.27688	44.7434	44.8598	0	停车	通过	WP
										54.8571	50	3.28125	46.319	45.7143	0	停车	通过	WP
										77.8378	71	3.28375	88.7266	64.8649	1	DZ	通过	WP
										70.2439	65	3.33125	73.2104	58.5366	1	DZ	通过	WP
										52.844	50	3.40625	43.2511	44.0367	0	停车	通过	WP
										65.4545	62	3.41	64.1873	54.5455	1	DZ	通过	WP
										85.9701	82	3.43375	106.987	71.6418	1	DZ	通过	WP
										56.4706	55	3.50625	48.853	47.0588	1	停车	通过	WP
										48	47	3.525	36.2963	40	0	停车	通过	WP
										76.8	76	3.5625	86.5185	64	1	DZ	通过	WP
										64.7191	65	3.61563	62.854	53.9326	1	停车	通过	WP
										78.9041	80	3.65	91.024	65.7534	1	DZ	通过	WP
										76.8	78	3.65625	86.5185	64	1	DZ	通过	WP
										69.3976	73	3.78688	71.573	57.8313	1	停车	通过	WP
										45.3543	49	3.88937	32.7526	37.7953	0	停车	通过	WP
										48.8136	53	3.90875	37.4222	40.678	0	停车	通过	WP
										60.6316	67	3.97812	55.6971	50.5263	1	停车	通过	WP
										53.8318	63	4.21313	44.7434	44.8598	0	停车	通过	WP
										44.3077	52	4.225	31.4004	36.9231	0	停车	通过	WP
										56.4706	69	4.39875	48.853	47.0588	1	停车	通过	WP
										60.6316	78	4.63125	55.6971	50.5263	1	停车	通过	WP
										57.6	75	4.6875	50.6667	48	1	停车	通过	WP
										39.7241	58	5.25625	25.8105	33.1034	0	停车	通过	WP
										38.1457	59	5.56812	24.0106	31.7881	0	停车	通过	WP
										41.1429	66	5.775	27.483	34.2857	0	停车	通过	WP
										41.1429	77	6.7375	27.483	34.2857	0	停车	通过	WP
										41.7391	79	6.81375	28.2014	34.7826	0	停车	通过	WP
																		33	12

## Sheet: Stop累积10%和90%差异对比
绿苑路停车	安虹路停车														绿苑路停车						安虹路停车
8.04375	7.96875
8.15625	8.0625														黄灯启亮时的速度	黄灯启亮时的距离	时间	编号		累计百分比	速度		距离	时间	编号		累计百分比	绿苑路时间
8.23437	12.0438														44.3077	18	1.4625	1	0.010101	0.010101	72.9114		66	3.25875	1	0.05	0.05	3.6
8.25	9.35833														19.2	8	1.5	2	0.010101	0.020202	64		66	3.7125	2	0.05	0.1
8.62187															44.3077	22	1.7875	3	0.010101	0.030303	75.7895		80	3.8	3	0.05	0.15
9															39.7241	24	2.175	4	0.010101	0.040404	54.8571		60	3.9375	4	0.05	0.2
9.28125															46.08	33	2.57812	5	0.010101	0.0505051	41.4388		46	3.99625	5	0.05	0.25
9.39375															59.3814	45	2.72813	6	0.010101	0.0606061	54.8571		62	4.06875	6	0.05	0.3
10.5187															64	49	2.75625	7	0.010101	0.0707071	52.844		63	4.29187	7	0.05	0.35
10.6313															19.2	15	2.8125	8	0.010101	0.0808081	54.3396		67	4.43875	8	0.05	0.4
9.01313															41.1429	33	2.8875	9	0.010101	0.0909091	53.8318		75	5.01563	9	0.05	0.45
															39.7241	32	2.9	10	0.010101	0.10101	56.4706		82	5.2275	10	0.05	0.5
															57.6	50	3.125	11	0.010101	0.111111	54.8571		84	5.5125	11	0.05	0.55
															57.6	51	3.1875	12	0.010101	0.121212	40		64	5.76	12	0.05	0.6
绿苑路通过	安虹路通过														54.8571	49	3.21563	13	0.010101	0.131313	48		77	5.775	13	0.05	0.65
3.4	3.65625														54.8571	50	3.28125	14	0.010101	0.141414	51.8919		86	5.96625	14	0.05	0.7
3.4125	3.78688		（1）10%停车的车辆差异不显著； (2)90%通过的车辆差异显著。在同样的情况下绿苑路通过的时间比安虹路短0.8秒。 也就是说绿苑路由于怕违章，因此驾驶更谨慎。或者由于安虹路前面通过的多，他们跟着也通过了。												50.087	47	3.37812	15	0.010101	0.151515	25.8296		43	5.99312	15	0.05	0.75
3.4875	3.88937														52.3636	50	3.4375	16	0.010101	0.161616	48		85	6.375	16	0.05	0.8
3.52188	3.90875														48	46	3.45	17	0.010101	0.171717	38.6577		79	7.35688	17	0.05	0.85
3.59375	3.97812														67.7647	66	3.50625	18	0.010101	0.181818	38.4		85	7.96875	18	0.05	0.9
3.7125	4.21313														46.08	45	3.51563	19	0.010101	0.191919	38.4		86	8.0625	19	0.05	0.95
3.75	4.225														48	49	3.675	20	0.010101	0.20202	24.5106		82	12.0438	20	0.05	1
3.99375	4.39875														33.8824	35	3.71875	21	0.010101	0.212121
4.0625	4.63125														46.08	49	3.82813	22	0.010101	0.222222
4.67187	4.6875														57.6	62	3.875	23	0.010101	0.232323
4.73187	5.25625														44.3077	48	3.9	24	0.010101	0.242424
5.4	5.56812														54.8571	60	3.9375	25	0.010101	0.252525
3.97818	5.775														57.6	63	3.9375	26	0.010101	0.262626
	6.7375														42.6667	47	3.96563	27	0.010101	0.272727
	6.81375														71.1111	79	3.99938	28	0.010101	0.282828
	4.76837														36	40	4	29	0.010101	0.292929
															54.8571	61	4.00312	30	0.010101	0.30303
															57.6	65	4.0625	31	0.010101	0.313131
															57.6	66	4.125	32	0.010101	0.323232
															54.8571	63	4.13438	33	0.010101	0.333333
															41.1429	49	4.2875	34	0.010101	0.343434
															64	77	4.33125	35	0.010101	0.353535
															41.1429	50	4.375	36	0.010101	0.363636
															54.8571	67	4.39687	37	0.010101	0.373737
															65.4545	81	4.455	38	0.010101	0.383838
															57.6	72	4.5	39	0.010101	0.393939
															42.6667	54	4.55625	40	0.010101	0.40404
															58.7755	75	4.59375	41	0.010101	0.414141
															54.8571	70	4.59375	42	0.010101	0.424242
															50.087	66	4.74375	43	0.010101	0.434343
															64	85	4.78125	44	0.010101	0.444444
															60	80	4.8	45	0.010101	0.454545
															57.6	77	4.8125	46	0.010101	0.464646
															60.6316	82	4.86875	47	0.010101	0.474747
															48	65	4.875	48	0.010101	0.484848
															57.6	78	4.875	49	0.010101	0.494949
															36	49	4.9	50	0.010101	0.505051
															36.4557	50	4.9375	51	0.010101	0.515152
															48	66	4.95	52	0.010101	0.525253
															48	66	4.95	53	0.010101	0.535354
															41.1429	58	5.075	54	0.010101	0.545455
															60.6316	88	5.225	55	0.010101	0.555556
															52.3636	76	5.225	56	0.010101	0.565657
															41.1429	60	5.25	57	0.010101	0.575758
															54.8571	80	5.25	58	0.010101	0.585859
															54.8571	82	5.38125	59	0.010101	0.59596
															39.7241	60	5.4375	60	0.010101	0.606061
															54.8571	83	5.44687	61	0.010101	0.616162
															52.3636	80	5.5	62	0.010101	0.626263
															41.1429	63	5.5125	63	0.010101	0.636364
															54.8571	86	5.64375	64	0.010101	0.646465
															41.1429	65	5.6875	65	0.010101	0.656566
															37.1613	60	5.8125	66	0.010101	0.666667
															53.8318	87	5.81813	67	0.010101	0.676768
															52.3636	87	5.98125	68	0.010101	0.686869
															46.08	78	6.09375	69	0.010101	0.69697
															47.6033	82	6.20125	70	0.010101	0.707071
															46.08	80	6.25	71	0.010101	0.717172
															28.0976	49	6.27812	72	0.010101	0.727273
															48	84	6.3	73	0.010101	0.737374
															38.4	68	6.375	74	0.010101	0.747475
															28.0976	51	6.53438	75	0.010101	0.757576
															32.9143	60	6.5625	76	0.010101	0.767677
															44.3077	83	6.74375	77	0.010101	0.777778
															42.6667	80	6.75	78	0.010101	0.787879
															41.7391	80	6.9	79	0.010101	0.79798
															44.3077	86	6.9875	80	0.010101	0.808081
															33.8824	66	7.0125	81	0.010101	0.818182
															46.08	90	7.03125	82	0.010101	0.828283
															46.08	90	7.03125	83	0.010101	0.838384
															37.1613	74	7.16875	84	0.010101	0.848485
															44.6512	90	7.25625	85	0.010101	0.858586
															39.7241	84	7.6125	86	0.010101	0.868687
															38.4	84	7.875	87	0.010101	0.878788
															20.5714	45	7.875	88	0.010101	0.888889
															37.1613	82	7.94375	89	0.010101	0.89899
															29.5385	66	8.04375	90	0.010101	0.909091
															39.7241	90	8.15625	91	0.010101	0.919192
															37.1613	85	8.23437	92	0.010101	0.929293
															34.9091	80	8.25	93	0.010101	0.939394
															37.1613	89	8.62187	94	0.010101	0.949495
															32	80	9	95	0.010101	0.959596
															34.9091	90	9.28125	96	0.010101	0.969697
															34.491	90	9.39375	97	0.010101	0.979798
															22.5882	66	10.5187	98	0.010101	0.989899
															27.4286	81	10.6313	99	0.010101	1

## Sheet: rear-end 
绿苑路		有电子警察	1								注：式中速度单位为km/h
															Rear-end Probability under Different Headway
headway=2.0															0.8
黄灯启亮时的速度_decision speed（km/h）	decision speed(m/s)	黄灯启亮时的距离_leading(m)	Estimated time to stop line_leading(s)	黄灯启亮时的距离_following	Estimated Time to Stop Line_following	logit（p）_leading	EXP_leading	logit（p）_following	EXP_following	P(stop)_leading	P(cross)_following	Probablity(rear-end)			Estimated Time to Stop Line_leading	Probablity_H=0.5	Probablity_H=1.0	Probablity_H=1.5	Probablity_H=2.0	Probablity_H=2.5	Probablity_H=3.0
19.2	5.33333	8	1.5	18.6667	3.5	-1.4224	0.241135	-2.5104	0.0812357	0.805714	0.0751323	0.0605352			0.0625	0.00559825	0.00550976	0.0053196	0.00493447	0.00424024	0.00321679
19.2	5.33333	15	2.8125	25.6667	4.8125	-2.1364	0.118079	-3.2244	0.0397796	0.894391	0.0382578	0.0342174			0.078125	0.0302333	0.0286501	0.0260315	0.0221439	0.0172074	0.0120481
20.5714	5.71429	45	7.875	56.4286	9.875	-4.98657	0.00682904	-6.15229	0.00212861	0.993217	0.00212409	0.00210968			0.125	0.00618718	0.00607921	0.0058484	0.00538596	0.00456897	0.00340197
22.5882	6.27451	66	10.5187	78.549	12.5187	-6.82	0.00109172	-8.1	0.000303539	0.998909	0.000303447	0.000303116			0.13125	0.00932189	0.00910288	0.00866028	0.00783193	0.00648307	0.00471622
27.4286	7.61905	81	10.6313	96.2381	12.6313	-7.60943	0.000495755	-9.16371	0.000104773	0.999504	0.000104762	0.00010471			0.135	0.0116838	0.0113609	0.0107298	0.00959507	0.00783188	0.00562963
28.0976	7.80488	51	6.53438	66.6098	8.53438	-4.44707	0.0117128	-6.03927	0.0023833	0.988423	0.00237764	0.00235011			0.1375	0.0134776	0.0130652	0.0122766	0.0108956	0.00881376	0.00629015
28.0976	7.80488	49	6.27812	64.6098	8.27812	-4.24307	0.0143634	-5.83527	0.00292264	0.98584	0.00291412	0.00287286			0.1875	0.00683663	0.00670495	0.0064251	0.00587094	0.00491273	0.00358831
29.5385	8.20513	66	8.04375	82.4103	10.0438	-5.75662	0.00316179	-7.43046	0.000592914	0.996848	0.000592562	0.000590695			0.196875	0.0102897	0.0100233	0.00948876	0.00850246	0.00693454	0.00494924
32	8.88889	80	9	97.7778	11	-6.808	0.0011049	-8.62133	0.00018022	0.998896	0.000180187	0.000179988			0.215625	0.0206706	0.0197923	0.0182185	0.0156831	0.0122243	0.00843993
32.9143	9.14286	60	6.5625	78.2857	8.5625	-4.62811	0.00977317	-6.49326	0.00151361	0.990321	0.00151132	0.0014967			0.225	0.0278155	0.026363	0.0238997	0.020178	0.0154341	0.0105419
33.8824	9.41176	35	3.71875	53.8235	5.71875	-1.93	0.145148	-3.85	0.0212797	0.873249	0.0208363	0.0181953			0.25	0.0075525	0.00739201	0.00705307	0.00639043	0.00527062	0.00377477
33.8824	9.41176	66	7.0125	84.8235	9.0125	-5.092	0.00614572	-7.012	0.000901005	0.993892	0.000900194	0.000894695			0.25	0.0075525	0.00739201	0.00705307	0.00639043	0.00527062	0.00377477
34.491	9.58084	90	9.39375	109.162	11.3938	-7.44687	0.000583262	-9.40137	8.26112e-05	0.999417	8.26044e-05	8.25562e-05			0.253125	0.0571039	0.052258	0.0452325	0.0363006	0.026664	0.0179451
34.9091	9.69697	80	8.25	99.3939	10.25	-6.36291	0.00172434	-8.34109	0.000238512	0.998279	0.000238455	0.000238045			0.2625	0.0113542	0.0110303	0.0103857	0.00921449	0.00739933	0.00517978
34.9091	9.69697	90	9.28125	109.394	11.2812	-7.38291	0.000621789	-9.36109	8.60062e-05	0.999379	8.59988e-05	8.59454e-05			0.2875	0.0227325	0.0216724	0.0197955	0.0168319	0.0129042	0.00875204
36	10	49	4.9	69	6.9	-3.034	0.0481228	-5.074	0.00625734	0.954087	0.00621843	0.00593292			0.296875	0.00529675	0.00520767	0.00500882	0.00459464	0.00384423	0.00277452
36	10	40	4	60	6	-2.116	0.120513	-4.156	0.0156701	0.892449	0.0154283	0.013769			0.375	0.00920967	0.00897173	0.00847647	0.00753574	0.00602389	0.00414383
36.4557	10.1266	50	4.9375	70.2532	6.9375	-3.06628	0.0465942	-5.1321	0.00590414	0.95548	0.00586949	0.00560818			0.4125	0.0198401	0.0189534	0.0173273	0.0146824	0.0111186	0.00736502
37.1613	10.3226	74	7.16875	94.6452	9.16875	-5.40632	0.00448811	-7.51213	0.000546417	0.995532	0.000546118	0.000543678			0.4125	0.0198401	0.0189534	0.0173273	0.0146824	0.0111186	0.00736502
37.1613	10.3226	82	7.94375	102.645	9.94375	-6.22232	0.00198463	-8.32813	0.000241624	0.998019	0.000241565	0.000241087			0.525	0.016764	0.0160633	0.0147247	0.0124651	0.00934556	0.00605131
37.1613	10.3226	89	8.62187	109.645	10.6219	-6.93632	0.000971837	-9.04213	0.000118319	0.999029	0.000118305	0.00011819			0.55	0.0239855	0.0226958	0.0203934	0.0168121	0.012283	0.0078452
37.1613	10.3226	60	5.8125	80.6452	7.8125	-3.97832	0.018717	-6.08413	0.00227875	0.981627	0.00227357	0.00223179			0.55	0.0239855	0.0226958	0.0203934	0.0168121	0.012283	0.0078452
37.1613	10.3226	85	8.23437	105.645	10.2344	-6.52832	0.00146146	-8.63413	0.000177928	0.998541	0.000177897	0.000177637			0.625	0.0562225	0.0508246	0.0429107	0.033031	0.0229021	0.0144125
38.4	10.6667	68	6.375	89.3333	8.375	-4.6048	0.0100037	-6.7808	0.00113537	0.990095	0.00113408	0.00112285			0.625	0.0136398	0.0131219	0.0120843	0.0102513	0.00763292	0.00483828
38.4	10.6667	84	7.875	105.333	9.875	-6.2368	0.00195611	-8.4128	0.000222007	0.998048	0.000221958	0.000221525			0.625	0.0136398	0.0131219	0.0120843	0.0102513	0.00763292	0.00483828
39.7241	11.0345	90	8.15625	112.069	10.1563	-6.64621	0.00129894	-8.89724	0.000136766	0.998703	0.000136747	0.00013657			0.6375	0.0160842	0.0153973	0.0140608	0.0117843	0.00866293	0.00545011
39.7241	11.0345	24	2.175	46.069	4.175	0.0857931	1.08958	-2.16524	0.114722	0.478565	0.102916	0.0492518			0.6875	0.0289079	0.0270451	0.0238218	0.0190536	0.0134153	0.00827417
39.7241	11.0345	60	5.4375	82.069	7.4375	-3.58621	0.0277032	-5.83724	0.00291688	0.973044	0.00290839	0.00282999			0.6875	0.0289079	0.0270451	0.0238218	0.0190536	0.0134153	0.00827417
39.7241	11.0345	84	7.6125	106.069	9.6125	-6.03421	0.0023954	-8.28524	0.000252212	0.99761	0.000252148	0.000251546			0.6875	0.0289079	0.0270451	0.0238218	0.0190536	0.0134153	0.00827417
39.7241	11.0345	32	2.9	54.069	4.9	-0.730207	0.481809	-2.98124	0.0507298	0.674851	0.0482806	0.0325822			0.75	0.00138795	0.00137677	0.00134462	0.00125745	0.00105454	0.000713013
41.1429	11.4286	58	5.075	80.8571	7.075	-3.16514	0.0422081	-5.49657	0.00410081	0.959501	0.00408406	0.00391866			0.8625	0.0470932	0.042642	0.0357686	0.02694	0.0179382	0.0106816
41.1429	11.4286	33	2.8875	55.8571	4.8875	-0.615143	0.540564	-2.94657	0.0525195	0.649113	0.0498988	0.03239			0.890625	0.0142332	0.0136021	0.0123131	0.0100621	0.00702882	0.00410647
41.1429	11.4286	49	4.2875	71.8571	6.2875	-2.24714	0.105701	-4.57857	0.0102696	0.904404	0.0101652	0.00919341			0.890625	0.0142332	0.0136021	0.0123131	0.0100621	0.00702882	0.00410647
41.1429	11.4286	50	4.375	72.8571	6.375	-2.34914	0.0954509	-4.68057	0.00927371	0.912866	0.0091885	0.00838787			0.903125	0.00602346	0.00587362	0.0055153	0.00475733	0.00350081	0.00207171
41.1429	11.4286	60	5.25	82.8571	7.25	-3.36914	0.0344191	-5.70057	0.00334405	0.966726	0.00333291	0.00322201			0.91875	0.0295415	0.0274043	0.023678	0.0182732	0.0122104	0.00709199
41.1429	11.4286	63	5.5125	85.8571	7.5125	-3.67514	0.0253458	-6.00657	0.00246252	0.975281	0.00245647	0.00239575			0.934375	0.0513018	0.0460374	0.0380905	0.0281953	0.0184505	0.0108361
41.1429	11.4286	65	5.6875	87.8571	7.6875	-3.87914	0.0206685	-6.21057	0.00200809	0.97975	0.00200407	0.00196348			0.9375	0.0220445	0.0207111	0.018219	0.0143218	0.00965255	0.0055561
41.7391	11.5942	80	6.9	103.188	8.9	-5.31791	0.00490298	-7.68313	0.000460531	0.995121	0.000460319	0.000458073			0.9375	0.0220445	0.0207111	0.018219	0.0143218	0.00965255	0.0055561
42.6667	11.8519	3	0.253125	26.7037	2.25313	2.678	14.556	0.260222	1.29722	0.0642841	0.564691	0.0363006			0.95625	0.0105497	0.0101539	0.00929084	0.00767546	0.00536555	0.00307453
42.6667	11.8519	47	3.96563	70.7037	5.96563	-1.81	0.163654	-4.22778	0.0145848	0.859362	0.0143751	0.0123534			0.95625	0.00665458	0.00647206	0.00603943	0.00514177	0.00370395	0.00214062
42.6667	11.8519	54	4.55625	77.7037	6.55625	-2.524	0.0801384	-4.94178	0.00714189	0.925807	0.00709125	0.00656513			0.95625	0.00665458	0.00647206	0.00603943	0.00514177	0.00370395	0.00214062
42.6667	11.8519	80	6.75	103.704	8.75	-5.176	0.00565056	-7.59378	0.000503575	0.994381	0.000503322	0.000500494			0.9625	0.0414974	0.0377108	0.0316472	0.0236593	0.0154637	0.00895226
44.3077	12.3077	18	1.4625	42.6154	3.4625	1.39908	4.05146	-1.11169	0.329002	0.197963	0.247556	0.0490067			0.984375	0.0323723	0.0298155	0.0254442	0.0192917	0.0126421	0.007225
44.3077	12.3077	22	1.7875	46.6154	3.7875	0.991077	2.69413	-1.51969	0.218779	0.270699	0.179507	0.0485924			0.984375	0.0323723	0.0298155	0.0254442	0.0192917	0.0126421	0.007225
44.3077	12.3077	48	3.9	72.6154	5.9	-1.66092	0.189964	-4.17169	0.0154261	0.840362	0.0151918	0.0127666			0.984375	0.0323723	0.0298155	0.0254442	0.0192917	0.0126421	0.007225
44.3077	12.3077	83	6.74375	107.615	8.74375	-5.23092	0.00534859	-7.74169	0.000434336	0.99468	0.000434147	0.000431838			1	0.0242183	0.0226148	0.0196696	0.0151946	0.0100328	0.00567387
44.3077	12.3077	86	6.9875	110.615	8.9875	-5.53692	0.00393863	-8.04769	0.000319839	0.996077	0.000319737	0.000318483			1.00938	0.017263	0.0163403	0.0145095	0.0114746	0.00768161	0.0043147
44.6512	12.4031	90	7.25625	114.806	9.25625	-5.89237	0.00276042	-8.4226	0.000219841	0.997247	0.000219793	0.000219188			1.0125	0.011636	0.0111558	0.0101216	0.00823198	0.00562963	0.00315784
46.08	12.8	1	0.078125	26.6	2.07812	3.40424	30.0914	0.79304	2.2101	0.0321632	0.688484	0.0221439			1.03125	0.0452853	0.0407934	0.0337616	0.0247892	0.0159107	0.0090812
46.08	12.8	8	0.625	33.6	2.625	2.69024	14.7352	0.07904	1.08225	0.0635517	0.51975	0.033031			1.0625	0.0265848	0.0246601	0.0211906	0.0160759	0.0103995	0.00578226
46.08	12.8	15	1.17188	40.6	3.17188	1.97624	7.21556	-0.63496	0.529957	0.12172	0.346387	0.0421623			1.0625	0.0265848	0.0246601	0.0211906	0.0160759	0.0103995	0.00578226
46.08	12.8	33	2.57812	58.6	4.57812	0.14024	1.15055	-2.47096	0.0845037	0.464997	0.0779192	0.0362322			1.0625	0.0265848	0.0246601	0.0211906	0.0160759	0.0103995	0.00578226
46.08	12.8	45	3.51562	70.6	5.51562	-1.08376	0.338321	-3.69496	0.0248484	0.747205	0.024246	0.0181167			1.0625	0.00811588	0.00784562	0.00721787	0.00597028	0.00411339	0.00226972
46.08	12.8	49	3.82812	74.6	5.82812	-1.49176	0.224976	-4.10296	0.0165237	0.816342	0.0162551	0.0132697			1.07812	0.0605832	0.0532926	0.0428168	0.0305911	0.0193551	0.0110806
46.08	12.8	78	6.09375	103.6	8.09375	-4.44976	0.0116814	-7.06096	0.000857954	0.988454	0.000857219	0.000847321			1.1	0.0493481	0.0440356	0.0359167	0.0258928	0.0163257	0.00919326
46.08	12.8	80	6.25	105.6	8.25	-4.65376	0.00952572	-7.26496	0.000699629	0.990564	0.00069914	0.000692543			1.125	0.0291565	0.0268511	0.022778	0.0169601	0.0107505	0.00588108
46.08	12.8	90	7.03125	115.6	9.03125	-5.67376	0.00343493	-8.28496	0.000252283	0.996577	0.000252219	0.000251356			1.17188	0.096129	0.0805358	0.061403	0.0421623	0.0263198	0.0152864
46.08	12.8	90	7.03125	115.6	9.03125	-5.67376	0.00343493	-8.28496	0.000252283	0.996577	0.000252219	0.000251356			1.1875	0.0229517	0.0213393	0.0183038	0.0137024	0.00859925	0.00457606
47.6033	13.2231	82	6.20125	108.446	8.20125	-4.62469	0.00980665	-7.32221	0.000660697	0.990289	0.000660261	0.000653849			1.1875	0.0229517	0.0213393	0.0183038	0.0137024	0.00859925	0.00457606
48	13.3333	66	4.95	92.6667	6.95	-2.932	0.0532904	-5.652	0.00351049	0.949406	0.00349821	0.00332122			1.1875	0.0229517	0.0213393	0.0183038	0.0137024	0.00859925	0.00457606
48	13.3333	3	0.225	29.6667	2.225	3.494	32.9174	0.774	2.16842	0.0294834	0.684386	0.020178			1.1875	0.0229517	0.0213393	0.0183038	0.0137024	0.00859925	0.00457606
48	13.3333	16	1.2	42.6667	3.2	2.168	8.74078	-0.552	0.575797	0.102661	0.365401	0.0375124			1.2	0.0837487	0.071009	0.0546112	0.0375124	0.0231841	0.0132183
48	13.3333	46	3.45	72.6667	5.45	-0.892	0.409835	-3.612	0.0269978	0.709303	0.0262881	0.0186462			1.2375	0.0171414	0.0161135	0.0140303	0.0106281	0.00664085	0.00344278
48	13.3333	49	3.675	75.6667	5.675	-1.198	0.301797	-3.918	0.0198808	0.768169	0.0194933	0.0149741			1.35	0.0207329	0.0192422	0.0163342	0.0118865	0.00709968	0.00355494
48	13.3333	65	4.875	91.6667	6.875	-2.83	0.0590129	-5.55	0.00388746	0.944276	0.0038724	0.00365662			1.36562	0.0302969	0.0275274	0.0226415	0.015956	0.00940214	0.00477355
48	13.3333	66	4.95	92.6667	6.95	-2.932	0.0532904	-5.652	0.00351049	0.949406	0.00349821	0.00332122			1.375	0.0417342	0.0371025	0.0296588	0.0204023	0.0119606	0.00617895
48	13.3333	84	6.3	110.667	8.3	-4.768	0.00849736	-7.488	0.000559761	0.991574	0.000559448	0.000554734			1.4625	0.135371	0.106081	0.0754847	0.0490067	0.0295739	0.0169689
50.087	13.913	13	0.934375	40.8261	2.93438	2.7933	16.3349	-0.0449565	0.956039	0.0576871	0.488763	0.0281953			1.5	0.125045	0.0989225	0.0776344	0.0605352	0.0469592	0.0362796
50.087	13.913	3	0.215625	30.8261	2.21562	3.8133	45.2999	0.975043	2.65128	0.0215983	0.726124	0.0156831			1.75313	0.0282109	0.0251325	0.0195585	0.0123848	0.00632549	0.00277704
50.087	13.913	4	0.2875	31.8261	2.2875	3.7113	40.9071	0.873043	2.39419	0.0238623	0.705379	0.0168319			1.7875	0.159675	0.117566	0.0786916	0.0485924	0.0283086	0.0158862
50.087	13.913	12	0.8625	39.8261	2.8625	2.8953	18.089	0.0570435	1.0587	0.0523862	0.514257	0.02694			1.8	0.0427935	0.0367543	0.0272368	0.016596	0.00843573	0.00380421
50.087	13.913	15	1.07812	42.8261	3.07812	2.5893	13.3205	-0.248957	0.779614	0.06983	0.43808	0.0305911			1.85625	0.0465881	0.0394878	0.0286691	0.0170815	0.00853737	0.00381385
50.087	13.913	47	3.37812	74.8261	5.37812	-0.674696	0.509311	-3.51296	0.0298087	0.662554	0.0289458	0.0191782			1.875	0.0792732	0.0633691	0.0435916	0.025555	0.013202	0.0063072
50.087	13.913	66	4.74375	93.8261	6.74375	-2.6127	0.0733366	-5.45096	0.0042922	0.931674	0.00427385	0.00398184			1.9	0.0650749	0.0530474	0.036933	0.0215088	0.0108309	0.00498671
52.3636	14.5455	2	0.1375	31.0909	2.1375	4.26364	71.0679	1.29636	3.65598	0.0138758	0.785222	0.0108956			1.9375	0.0850458	0.0668539	0.0450578	0.0259357	0.0132343	0.00627969
52.3636	14.5455	6	0.4125	35.0909	2.4125	3.85564	47.2587	0.888364	2.43115	0.0207217	0.708552	0.0146824			1.95937	0.0702074	0.0563161	0.0383864	0.0219153	0.0108872	0.00497605
52.3636	14.5455	6	0.4125	35.0909	2.4125	3.85564	47.2587	0.888364	2.43115	0.0207217	0.708552	0.0146824			1.96875	0.0549387	0.0452325	0.0314672	0.0179451	0.00869429	0.00381928
52.3636	14.5455	8	0.55	37.0909	2.55	3.65164	38.5377	0.684364	1.98251	0.0252923	0.664712	0.0168121			2.025	0.0594924	0.048212	0.0328088	0.0183179	0.00874943	0.00381507
52.3636	14.5455	10	0.6875	39.0909	2.6875	3.44764	31.426	0.480364	1.61666	0.0308394	0.617834	0.0190536			2.1375	0.0693199	0.054284	0.0353165	0.0189348	0.00881292	0.00379277
52.3636	14.5455	10	0.6875	39.0909	2.6875	3.44764	31.426	0.480364	1.61666	0.0308394	0.617834	0.0190536			2.175	0.183275	0.125003	0.0802242	0.0492518	0.0293558	0.0171755
52.3636	14.5455	10	0.6875	39.0909	2.6875	3.44764	31.426	0.480364	1.61666	0.0308394	0.617834	0.0190536			2.39063	0.0755941	0.0559015	0.0332676	0.0161693	0.00690316	0.00276493
52.3636	14.5455	15	1.03125	44.0909	3.03125	2.93764	18.8712	-0.0296364	0.970798	0.0503241	0.492591	0.0247892			2.45	0.0308976	0.0251877	0.0158126	0.00720677	0.00262443	0.000863326
52.3636	14.5455	80	5.5	109.091	7.5	-3.69236	0.024913	-6.65964	0.00128161	0.975693	0.00127997	0.00124886			2.57812	0.174185	0.110527	0.0649391	0.0362322	0.0195939	0.0104106
52.3636	14.5455	87	5.98125	116.091	7.98125	-4.40636	0.0121995	-7.37364	0.000627582	0.987948	0.000627188	0.000619629			2.64375	0.11998	0.0778609	0.0416542	0.0193614	0.00832692	0.0034535
52.3636	14.5455	76	5.225	105.091	7.225	-3.28436	0.0374644	-6.25164	0.0019273	0.963888	0.00192359	0.00185413			2.72813	0.146968	0.0905348	0.0478881	0.0228858	0.0103515	0.00455969
52.3636	14.5455	8	0.55	37.0909	2.55	3.65164	38.5377	0.684364	1.98251	0.0252923	0.664712	0.0168121			2.73125	0.142338	0.0879332	0.0462246	0.021807	0.00970494	0.00420112
52.3636	14.5455	14	0.9625	43.0909	2.9625	3.03964	20.8976	0.0723636	1.07505	0.045667	0.518083	0.0236593			2.75625	0.13028	0.0807904	0.0416321	0.0189227	0.00805003	0.00332275
52.3636	14.5455	16	1.1	45.0909	3.1	2.83564	17.0412	-0.131636	0.87666	0.0554286	0.467138	0.0258928			2.8125	0.073818	0.0573661	0.0443825	0.0342174	0.0263084	0.0201845
52.3636	14.5455	50	3.4375	79.0909	5.4375	-0.632364	0.531334	-3.59964	0.0273337	0.653025	0.0266064	0.0173747			2.8175	0.140659	0.0847157	0.0431	0.0196571	0.00847108	0.00355701
53.3333	14.8148	2	0.135	31.6296	2.135	4.412	82.4342	1.38978	4.01396	0.0119855	0.800557	0.00959507			2.85	0.149436	0.0885323	0.045121	0.0209131	0.00922694	0.00397861
53.8318	14.9533	87	5.81813	116.907	7.81813	-4.18174	0.0152719	-7.23221	0.000722925	0.984958	0.000722402	0.000711536			2.8875	0.150485	0.0936004	0.0558119	0.03239	0.0184909	0.010455
54.8571	15.2381	15	0.984375	45.4762	2.98438	3.31914	27.6367	0.210571	1.23438	0.0349203	0.552449	0.0192917			2.9	0.14533	0.0912413	0.0551853	0.0325822	0.0189538	0.0109288
54.8571	15.2381	14	0.91875	44.4762	2.91875	3.42114	30.6044	0.312571	1.36694	0.0316412	0.577513	0.0182732			2.90937	0.152027	0.0882561	0.0443445	0.0203925	0.00896342	0.00385847
54.8571	15.2381	15	0.984375	45.4762	2.98438	3.31914	27.6367	0.210571	1.23438	0.0349203	0.552449	0.0192917			2.90938	0.152027	0.0882561	0.0443445	0.0203925	0.00896342	0.00385847
54.8571	15.2381	63	4.13438	93.4762	6.13438	-1.57686	0.206623	-4.68543	0.00922878	0.828759	0.00914439	0.00757849			2.90938	0.152027	0.0882561	0.0443445	0.0203925	0.00896342	0.00385847
54.8571	15.2381	80	5.25	110.476	7.25	-3.31086	0.0364849	-6.41943	0.00162959	0.964799	0.00162694	0.00156967			2.90938	0.152027	0.0882561	0.0443445	0.0203925	0.00896342	0.00385847
54.8571	15.2381	86	5.64375	116.476	7.64375	-3.92286	0.0197845	-7.03143	0.000883668	0.980599	0.000882888	0.00086576			3.125	0.157344	0.0860753	0.0425207	0.0198297	0.00898568	0.00401741
54.8571	15.2381	49	3.21563	79.4762	5.21563	-0.148857	0.861692	-3.25743	0.0384872	0.537146	0.0370609	0.0199071			3.125	0.157344	0.0860753	0.0425207	0.0198297	0.00898568	0.00401741
54.8571	15.2381	70	4.59375	100.476	6.59375	-2.29086	0.10118	-5.39943	0.00451916	0.908117	0.00449883	0.00408547			3.125	0.157344	0.0860753	0.0425207	0.0198297	0.00898568	0.00401741
54.8571	15.2381	82	5.38125	112.476	7.38125	-3.51486	0.0297521	-6.62343	0.00132887	0.971108	0.0013271	0.00128876			3.1875	0.155139	0.0835645	0.0408962	0.01898	0.00858088	0.00383239
54.8571	15.2381	60	3.9375	90.4762	5.9375	-1.27086	0.280591	-4.37943	0.0125325	0.780889	0.0123774	0.00966538			3.21563	0.152408	0.0827501	0.0414955	0.0199071	0.00933863	0.00433384
54.8571	15.2381	67	4.39687	97.4762	6.39687	-1.98486	0.1374	-5.09343	0.00613694	0.879198	0.00609951	0.00536268			3.28125	0.148173	0.0794238	0.0395287	0.0188893	0.00884426	0.0041007
54.8571	15.2381	2	0.13125	32.4762	2.13125	4.64514	104.078	1.53657	4.64862	0.00951672	0.822966	0.00783193			3.37812	0.132726	0.0726811	0.0378591	0.0191782	0.00957375	0.00474376
54.8571	15.2381	3	0.196875	33.4762	2.19687	4.54314	93.9857	1.43457	4.19785	0.0105279	0.807613	0.00850246			3.4375	0.131875	0.0702338	0.0354453	0.0173747	0.00839157	0.00402354
54.8571	15.2381	4	0.2625	34.4762	2.2625	4.44114	84.8719	1.33257	3.79078	0.0116453	0.791266	0.00921449			3.45	0.121951	0.0675094	0.0358866	0.0186462	0.00957062	0.00488113
54.8571	15.2381	8	0.525	38.4762	2.525	4.03314	56.438	0.924571	2.52079	0.0174101	0.715973	0.0124651			3.50625	0.14104	0.0660556	0.0276555	0.010982	0.00426554	0.00164231
54.8571	15.2381	15	0.984375	45.4762	2.98437	3.31914	27.6367	0.210571	1.23438	0.0349203	0.552449	0.0192917			3.51562	0.111894	0.062756	0.0340405	0.0181167	0.00954222	0.00499815
54.8571	15.2381	50	3.28125	80.4762	5.28125	-0.250857	0.778134	-3.35943	0.0347551	0.562387	0.0335878	0.0188893			3.675	0.101874	0.0552243	0.0290064	0.0149741	0.00765982	0.00389978
54.8571	15.2381	61	4.00312	91.4762	6.00312	-1.37286	0.253382	-4.48143	0.0113172	0.797841	0.0111906	0.00892831			3.71875	0.0719674	0.0459767	0.0290323	0.0181953	0.0113491	0.00705761
54.8571	15.2381	83	5.44687	113.476	7.44687	-3.61686	0.026867	-6.72543	0.00120001	0.973836	0.00119857	0.00116721			3.82812	0.0855859	0.0469127	0.025114	0.0132697	0.00696229	0.00363935
56.4706	15.6863	10	0.6375	41.3725	2.6375	4.076	58.9094	0.876	2.40128	0.0166919	0.705993	0.0117843			3.875	0.0989546	0.0472753	0.0216756	0.00974369	0.00434043	0.00192561
57.6	16	1	0.0625	33	2.0625	5.1668	175.353	1.9028	6.70464	0.00567045	0.870208	0.00493447			3.9	0.0773723	0.0431553	0.0236023	0.0127666	0.0068637	0.003678
57.6	16	2	0.125	34	2.125	5.0648	158.349	1.8008	6.05449	0.00627554	0.858246	0.00538596			3.9375	0.0892202	0.0437146	0.0207232	0.00966538	0.00447326	0.00206282
57.6	16	3	0.1875	35	2.1875	4.9628	142.994	1.6988	5.46738	0.00694475	0.845378	0.00587094			3.9375	0.0928552	0.0440597	0.0201334	0.00903633	0.00402249	0.00178399
57.6	16	4	0.25	36	2.25	4.8608	129.127	1.5968	4.93721	0.00768477	0.831571	0.00639043			3.96563	0.0705346	0.0400289	0.022343	0.0123534	0.00679394	0.00372542
57.6	16	4	0.25	36	2.25	4.8608	129.127	1.5968	4.93721	0.00768477	0.831571	0.00639043			3.99938	0.101404	0.0409453	0.0155524	0.00576373	0.00211622	0.000774312
57.6	16	6	0.375	38	2.375	4.6568	105.299	1.3928	4.02611	0.00940746	0.801039	0.00753574			4	0.0602258	0.0371673	0.0226964	0.013769	0.00831951	0.0050145
57.6	16	10	0.625	42	2.625	4.2488	70.0213	0.9848	2.67728	0.0140803	0.72806	0.0102513			4.00312	0.0832398	0.0405527	0.0191692	0.00892831	0.00412947	0.00190371
57.6	16	10	0.625	42	2.625	4.2488	70.0213	0.9848	2.67728	0.0140803	0.72806	0.0102513			4.0625	0.0810415	0.0379941	0.0172605	0.00772598	0.003435	0.00152261
57.6	16	15	0.9375	47	2.9375	3.7388	42.0475	0.4748	1.60769	0.0232302	0.616519	0.0143218			4.125	0.0754046	0.0351652	0.0159348	0.00712432	0.00316585	0.00140298
57.6	16	15	0.9375	47	2.9375	3.7388	42.0475	0.4748	1.60769	0.0232302	0.616519	0.0143218			4.13438	0.0718935	0.0346759	0.0163098	0.00757849	0.00350126	0.00161328
57.6	16	16	1	48	3	3.6368	37.9701	0.3728	1.45179	0.0256607	0.592135	0.0151946			4.2875	0.0503974	0.0288469	0.0163354	0.00919341	0.00515584	0.00288578
57.6	16	17	1.0625	49	3.0625	3.5348	34.2882	0.2708	1.31101	0.0283381	0.567289	0.0160759			4.33125	0.0624433	0.0263988	0.010867	0.00442322	0.00179207	0.000724691
57.6	16	17	1.0625	49	3.0625	3.5348	34.2882	0.2708	1.31101	0.0283381	0.567289	0.0160759			4.375	0.0461857	0.0263749	0.0149155	0.00838787	0.00470204	0.00263114
57.6	16	17	1.0625	49	3.0625	3.5348	34.2882	0.2708	1.31101	0.0283381	0.567289	0.0160759			4.39687	0.0522354	0.0248099	0.0115821	0.00536268	0.00247347	0.00113883
57.6	16	18	1.125	50	3.125	3.4328	30.9632	0.1688	1.18388	0.031286	0.5421	0.0169601			4.455	0.0530354	0.0217976	0.00875843	0.00348664	0.00138282	0.000547623
57.6	16	22	1.375	54	3.375	3.0248	20.5899	-0.2392	0.787257	0.046318	0.440484	0.0204023			4.5	0.0467249	0.021286	0.0095401	0.00424402	0.00188171	0.00083307
57.6	16	31	1.9375	63	3.9375	2.1068	8.22189	-1.1572	0.314365	0.108438	0.239176	0.0259357			4.55625	0.0388368	0.0216312	0.0119454	0.00656513	0.00359862	0.00196968
57.6	16	50	3.125	82	5.125	0.1688	1.18388	-3.0952	0.045266	0.4579	0.0433057	0.0198297			4.59375	0.041339	0.0184569	0.00812089	0.00354982	0.00154724	0.00067354
57.6	16	50	3.125	82	5.125	0.1688	1.18388	-3.0952	0.045266	0.4579	0.0433057	0.0198297			4.59375	0.0403628	0.019012	0.00884016	0.00408547	0.00188274	0.000866498
57.6	16	50	3.125	82	5.125	0.1688	1.18388	-3.0952	0.045266	0.4579	0.0433057	0.0198297			4.74375	0.0324366	0.0162415	0.00805992	0.00398184	0.00196276	0.000966435
57.6	16	62	3.875	94	5.875	-1.0552	0.348123	-4.3192	0.0133105	0.741772	0.0131357	0.00974369			4.78125	0.0317804	0.0131054	0.00533827	0.00216345	0.000874979	0.000353577
57.6	16	63	3.9375	95	5.9375	-1.1572	0.314365	-4.4212	0.0120198	0.760824	0.011877	0.00903633			4.8	0.0306609	0.0133582	0.00575707	0.00246945	0.00105709	0.000452113
57.6	16	65	4.0625	97	6.0625	-1.3612	0.256353	-4.6252	0.00980169	0.795955	0.00970655	0.00772598			4.8125	0.0299968	0.0135075	0.00602178	0.00267247	0.00118365	0.00052378
57.6	16	66	4.125	98	6.125	-1.4632	0.231494	-4.7272	0.00885122	0.812022	0.00877356	0.00712432			4.86875	0.0276022	0.0118954	0.00507629	0.00215712	0.000914993	0.000387817
57.6	16	72	4.5	104	6.5	-2.0752	0.125531	-5.3392	0.00479971	0.888469	0.00477678	0.00424402			4.875	0.0274114	0.0140889	0.0071906	0.00365662	0.00185605	0.000941219
57.6	16	77	4.8125	109	6.8125	-2.5852	0.075381	-5.8492	0.0028822	0.929903	0.00287392	0.00267247			4.875	0.027359	0.0122985	0.0054785	0.00243051	0.00107632	0.000476252
57.6	16	78	4.875	110	6.875	-2.6872	0.0680713	-5.9512	0.00260272	0.936267	0.00259596	0.00243051			4.9	0.0267964	0.0162737	0.00983934	0.00593292	0.00357157	0.00214792
57.6	16	30	1.875	62	3.875	2.2088	9.10478	-1.0552	0.348123	0.098963	0.258228	0.025555			4.9375	0.0258435	0.0155891	0.00936258	0.00560818	0.00335396	0.00200391
57.6	16	51	3.1875	83	5.1875	0.0668	1.06908	-3.1972	0.0408765	0.483306	0.0392712	0.01898			4.95	0.0249581	0.0128103	0.00653342	0.00332122	0.0016855	0.000854649
58.7755	16.3265	75	4.59375	107.653	6.59375	-2.20135	0.110654	-5.53196	0.00395823	0.90037	0.00394262	0.00354982			4.95	0.0249581	0.0128103	0.00653342	0.00332122	0.0016855	0.000854649
59.3814	16.4948	45	2.72813	77.9897	4.72813	0.951361	2.58923	-2.41359	0.0894936	0.278611	0.0821424	0.0228858			5.075	0.0220899	0.0124595	0.0069963	0.00391866	0.00219175	0.00122489
60	16.6667	80	4.8	113.333	6.8	-2.524	0.0801384	-5.924	0.00267448	0.925807	0.00266735	0.00246945			5.225	0.0156544	0.00669407	0.00284708	0.0012081	0.000512132	0.00021701
60.6316	16.8421	15	0.890625	48.6842	2.89063	4.20263	66.8621	0.766842	2.15296	0.0147358	0.682837	0.0100621			5.225	0.0168965	0.00812149	0.00388498	0.00185413	0.000883913	0.000421163
60.6316	16.8421	20	1.1875	53.6842	3.1875	3.69263	40.1504	0.256842	1.29284	0.0243011	0.56386	0.0137024			5.25	0.0182266	0.0102614	0.00575592	0.00322201	0.0018015	0.00100661
60.6316	16.8421	49	2.90938	82.6842	4.90938	0.734632	2.08471	-2.70116	0.0671277	0.324179	0.0629051	0.0203925			5.25	0.0159154	0.00738238	0.0034079	0.00156967	0.000722238	0.00033216
60.6316	16.8421	46	2.73125	79.6842	4.73125	1.04063	2.831	-2.39516	0.0911583	0.261028	0.0835427	0.021807			5.38125	0.0131031	0.00606798	0.00279901	0.00128876	0.000592891	0.000272652
60.6316	16.8421	17	1.00938	50.6842	3.00938	3.99863	54.5235	0.562842	1.75566	0.0180104	0.63711	0.0114746			5.4375	0.0151168	0.00866902	0.00495719	0.00282999	0.00161409	0.000920097
60.6316	16.8421	20	1.1875	53.6842	3.1875	3.69263	40.1504	0.256842	1.29284	0.0243011	0.56386	0.0137024			5.44687	0.0118813	0.00549829	0.0025354	0.00116721	0.000536934	0.000246912
60.6316	16.8421	49	2.90938	82.6842	4.90938	0.734632	2.08471	-2.70116	0.0671277	0.324179	0.0629051	0.0203925			5.5	0.0114406	0.00548223	0.00261861	0.00124886	0.000595165	0.000283536
60.6316	16.8421	49	2.90938	82.6842	4.90938	0.734632	2.08471	-2.70116	0.0671277	0.324179	0.0629051	0.0203925			5.5125	0.0136082	0.0076446	0.00428281	0.00239575	0.001339	0.000748018
60.6316	16.8421	20	1.1875	53.6842	3.1875	3.69263	40.1504	0.256842	1.29284	0.0243011	0.56386	0.0137024			5.64375	0.00883843	0.00408307	0.00188129	0.00086576	0.000398195	0.000183097
60.6316	16.8421	20	1.1875	53.6842	3.1875	3.69263	40.1504	0.256842	1.29284	0.0243011	0.56386	0.0137024			5.6875	0.0111766	0.00627152	0.00351132	0.00196348	0.00109719	0.000612863
60.6316	16.8421	23	1.36562	56.6842	3.36562	3.38663	29.5662	-0.0491579	0.952031	0.0327159	0.487713	0.015956			5.8125	0.0107343	0.00636921	0.00377229	0.00223179	0.00131954	0.00077988
60.6316	16.8421	48	2.85	81.6842	4.85	0.836632	2.30858	-2.59916	0.0743362	0.302245	0.0691926	0.0209131			5.81813	0.00696673	0.0032619	0.00152419	0.000711536	0.00033202	0.000154897
60.6316	16.8421	82	4.86875	115.684	6.86875	-2.63137	0.0719799	-6.06716	0.00231775	0.932853	0.00231239	0.00215712			5.98125	0.00570678	0.00272608	0.00130017	0.000619629	0.000295194	0.000140607
60.6316	16.8421	88	5.225	121.684	7.225	-3.24337	0.0390322	-6.67916	0.00125684	0.962434	0.00125526	0.0012081			6.09375	0.00597461	0.00311934	0.00162634	0.000847321	0.000441285	0.000229776
60.6316	16.8421	5	0.296875	38.6842	2.29687	5.22263	185.421	1.78684	5.97057	0.00536419	0.85654	0.00459464			6.20125	0.0049231	0.00251431	0.00128257	0.000653849	0.000333226	0.000169797
60.6316	16.8421	15	0.890625	48.6842	2.89062	4.20263	66.8621	0.766842	2.15296	0.0147358	0.682837	0.0100621			6.25	0.00488793	0.00255062	0.00132946	0.000692543	0.000360649	0.000187782
60.6316	16.8421	32	1.9	65.6842	3.9	2.46863	11.8063	-0.967158	0.380162	0.0780867	0.275447	0.0215088			6.27812	0.0094194	0.00634626	0.00427136	0.00287286	0.00193134	0.00129798
60.6316	16.8421	33	1.95937	66.6842	3.95937	2.36663	10.6614	-1.06916	0.343297	0.0857529	0.255563	0.0219153			6.3	0.00425034	0.00215786	0.00109438	0.000554734	0.000281115	0.000142438
60.6316	16.8421	49	2.90937	82.6842	4.90937	0.734632	2.08471	-2.70116	0.0671277	0.324179	0.0629051	0.0203925			6.375	0.00571567	0.00332556	0.00193295	0.00112285	0.000652035	0.00037856
62.6087	17.3913	49	2.8175	83.7826	4.8175	1.03713	2.82111	-2.5107	0.0812117	0.261704	0.0751118	0.0196571			6.53438	0.00771489	0.00519486	0.00349505	0.00235011	0.00157964	0.00106149
64	17.7778	77	4.33125	112.556	6.33125	-1.606	0.200689	-5.23267	0.00533927	0.832855	0.00531091	0.00442322			6.5625	0.00603465	0.00379432	0.00238369	0.0014967	0.000939448	0.000589551
64	17.7778	18	1.0125	53.5556	3.0125	4.412	82.4342	0.785333	2.19314	0.0119855	0.686828	0.00823198			6.74375	0.00283192	0.00151375	0.000808647	0.000431838	0.000230571	0.000123097
64	17.7778	35	1.96875	70.5556	3.96875	2.678	14.556	-0.948667	0.387257	0.0642841	0.279153	0.0179451			6.75	0.00306055	0.00167455	0.000915638	0.000500494	0.000273521	0.000149465
64	17.7778	22	1.2375	57.5556	3.2375	4.004	54.817	0.377333	1.45839	0.0179157	0.59323	0.0106281			6.9	0.00269376	0.00149308	0.00082713	0.000458073	0.000253644	0.000140434
64	17.7778	85	4.78125	120.556	6.78125	-2.422	0.088744	-6.04867	0.00236101	0.91849	0.00235545	0.00216345			6.9875	0.00208988	0.00111672	0.000596441	0.000318483	0.000170038	9.07775e-05
64	17.7778	17	0.95625	52.5556	2.95625	4.514	91.2862	0.887333	2.42864	0.0108359	0.70834	0.00767546			7.0125	0.00376532	0.00233329	0.00144509	0.000894695	0.000553813	0.000342763
64	17.7778	24	1.35	59.5556	3.35	3.8	44.7012	0.173333	1.18926	0.0218813	0.543225	0.0118865			7.03125	0.00177887	0.000926849	0.00048272	0.000251356	0.000130868	6.81324e-05
64	17.7778	32	1.8	67.5556	3.8	2.984	19.7667	-0.642667	0.525888	0.048154	0.344644	0.016596			7.03125	0.00177887	0.000926849	0.00048272	0.000251356	0.000130868	6.81324e-05
64	17.7778	33	1.85625	68.5556	3.85625	2.882	17.8499	-0.744667	0.474893	0.0530506	0.321985	0.0170815			7.16875	0.00263229	0.00155657	0.000920052	0.000543678	0.000321221	0.000189769
64	17.7778	36	2.025	71.5556	4.025	2.576	13.1445	-1.05067	0.349705	0.0706991	0.259097	0.0183179			7.25625	0.00146024	0.000776259	0.000412524	0.000219188	0.000116451	6.1866e-05
64	17.7778	38	2.1375	73.5556	4.1375	2.372	10.7188	-1.25467	0.285171	0.0853329	0.221893	0.0189348			7.6125	0.00135939	0.000774809	0.000441506	0.000251546	0.000143305	8.16366e-05
64	17.7778	47	2.64375	82.5556	4.64375	1.454	4.2802	-2.17267	0.113874	0.189387	0.102232	0.0193614			7.875	0.00113186	0.000657272	0.0003816	0.000221525	0.00012859	7.46404e-05
64	17.7778	49	2.75625	84.5556	4.75625	1.25	3.49034	-2.37667	0.0928596	0.2227	0.0849694	0.0189227			7.875	0.00504229	0.00377242	0.00282144	0.00210968	0.00157719	0.00117894
65.4545	18.1818	81	4.455	117.364	6.455	-1.79145	0.166717	-5.50055	0.00408454	0.857106	0.00406793	0.00348664			7.94375	0.00116862	0.000690634	0.000408071	0.000241087	0.000142423	8.4134e-05
67.7647	18.8235	17	0.903125	54.6471	2.90313	5.09	162.39	1.25	3.49034	0.00612033	0.7773	0.00475733			8.04375	0.00206978	0.001363	0.000897356	0.000590695	0.00038879	0.000255881
67.7647	18.8235	18	0.95625	55.6471	2.95625	4.988	146.643	1.148	3.15188	0.0067731	0.759145	0.00514177			8.15625	0.000738416	0.000420762	0.000239724	0.00013657	7.77995e-05	4.43188e-05
67.7647	18.8235	20	1.0625	57.6471	3.0625	4.784	119.582	0.944	2.57024	0.00829313	0.719907	0.00597028			8.23437	0.000861274	0.000508932	0.000300688	0.000177637	0.000104937	6.19889e-05
67.7647	18.8235	33	1.75313	70.6471	3.75313	3.458	31.7534	-0.382	0.682495	0.0305312	0.405645	0.0123848			8.25	0.00104867	0.000639794	0.000390275	0.000238045	0.000145185	8.85456e-05
67.7647	18.8235	45	2.39063	82.6471	4.39063	2.234	9.33714	-1.606	0.200689	0.0967386	0.167145	0.0161693			8.62187	0.000573175	0.000338652	0.000200069	0.00011819	6.98178e-05	4.12424e-05
67.7647	18.8235	66	3.50625	103.647	5.50625	0.092	1.09636	-3.748	0.0235648	0.477016	0.0230223	0.010982			9	0.000700904	0.000445543	0.000283191	0.000179988	0.000114391	7.26994e-05
67.7647	18.8235	18	0.95625	55.6471	2.95625	4.988	146.643	1.148	3.15188	0.0067731	0.759145	0.00514177			9.28125	0.000378818	0.000231055	0.000140921	8.59454e-05	5.24154e-05	3.19661e-05
71.1111	19.7531	79	3.99938	118.506	5.99938	-0.722	0.48578	-4.75163	0.00863761	0.673047	0.00856364	0.00576373			9.39375	0.000357478	0.000219332	0.000134565	8.25562e-05	5.06474e-05	3.10713e-05
76.8	21.3333	16	0.75	58.6667	2.75	6.5744	716.516	2.2224	9.22945	0.0013937	0.902243	0.00125745			10.5187	0.00079126	0.000574698	0.000417382	0.000303116	0.000220126	0.000159854
82.2857	22.8571	56	2.45	101.714	4.45	3.33371	28.0423	-1.32914	0.264704	0.0344325	0.209301	0.00720677			10.6313	0.000335855	0.000227743	0.000154426	0.00010471	7.09985e-05	4.81398e-05
headway=0.5
黄灯启亮时的速度_decision speed（km/h）	decision speed(m/s)	黄灯启亮时的距离_leading(m)	Estimated time to stop line_leading(s)	黄灯启亮时的距离_following	Estimated Time to Stop Line_following	logit（p）_leading	EXP_leading	logit（p）_following	EXP_following	P(stop)_leading	P(cross)_following	P(rear-end)
19.2	5.33333	8	1.5	10.6667	2	-1.4224	0.241135	-1.6944	0.183709	0.805714	0.155198	0.125045
19.2	5.33333	15	2.8125	17.6667	3.3125	-2.1364	0.118079	-2.4084	0.0899591	0.894391	0.0825344	0.073818
20.5714	5.71429	45	7.875	47.8571	8.375	-4.98657	0.00682904	-5.278	0.00510263	0.993217	0.00507672	0.00504229
22.5882	6.27451	66	10.5187	69.1373	11.0187	-6.82	0.00109172	-7.14	0.000792752	0.998909	0.000792124	0.00079126
27.4286	7.61905	81	10.6313	84.8095	11.1313	-7.60943	0.000495755	-7.998	0.000336134	0.999504	0.000336021	0.000335855
28.0976	7.80488	51	6.53438	54.9024	7.03438	-4.44707	0.0117128	-4.84512	0.00786666	0.988423	0.00780526	0.00771489
28.0976	7.80488	49	6.27812	52.9024	6.77812	-4.24307	0.0143634	-4.64112	0.00964687	0.98584	0.0095547	0.0094194
29.5385	8.20513	66	8.04375	70.1026	8.54375	-5.75662	0.00316179	-6.17508	0.00208065	0.996848	0.00207633	0.00206978
32	8.88889	80	9	84.4444	9.5	-6.808	0.0011049	-7.26133	0.000702171	0.998896	0.000701678	0.000700904
32.9143	9.14286	60	6.5625	64.5714	7.0625	-4.62811	0.00977317	-5.0944	0.00613098	0.990321	0.00609362	0.00603465
33.8824	9.41176	35	3.71875	39.7059	4.21875	-1.93	0.145148	-2.41	0.0898153	0.873249	0.0824133	0.0719674
33.8824	9.41176	66	7.0125	70.7059	7.5125	-5.092	0.00614572	-5.572	0.00380287	0.993892	0.00378846	0.00376532
34.491	9.58084	90	9.39375	94.7904	9.89375	-7.44687	0.000583262	-7.9355	0.000357814	0.999417	0.000357686	0.000357478
34.9091	9.69697	80	8.25	84.8485	8.75	-6.36291	0.00172434	-6.85745	0.00105159	0.998279	0.00105048	0.00104867
34.9091	9.69697	90	9.28125	94.8485	9.78125	-7.38291	0.000621789	-7.87745	0.000379197	0.999379	0.000379053	0.000378818
36	10	49	4.9	54	5.4	-3.034	0.0481228	-3.544	0.0288975	0.954087	0.0280859	0.0267964
36	10	40	4	45	4.5	-2.116	0.120513	-2.626	0.0723674	0.892449	0.0674837	0.0602258
36.4557	10.1266	50	4.9375	55.0633	5.4375	-3.06628	0.0465942	-3.58273	0.0277996	0.95548	0.0270477	0.0258435
37.1613	10.3226	74	7.16875	79.1613	7.66875	-5.40632	0.00448811	-5.93277	0.00265112	0.995532	0.00264411	0.00263229
37.1613	10.3226	82	7.94375	87.1613	8.44375	-6.22232	0.00198463	-6.74877	0.00117232	0.998019	0.00117094	0.00116862
37.1613	10.3226	89	8.62187	94.1613	9.12187	-6.93632	0.000971837	-7.46277	0.000574061	0.999029	0.000573732	0.000573175
37.1613	10.3226	60	5.8125	65.1613	6.3125	-3.97832	0.018717	-4.50477	0.0110561	0.981627	0.0109352	0.0107343
37.1613	10.3226	85	8.23437	90.1613	8.73437	-6.52832	0.00146146	-7.05477	0.000863278	0.998541	0.000862533	0.000861274
38.4	10.6667	68	6.375	73.3333	6.875	-4.6048	0.0100037	-5.1488	0.00580637	0.990095	0.00577285	0.00571567
38.4	10.6667	84	7.875	89.3333	8.375	-6.2368	0.00195611	-6.7808	0.00113537	0.998048	0.00113408	0.00113186
39.7241	11.0345	90	8.15625	95.5172	8.65625	-6.64621	0.00129894	-7.20897	0.000739922	0.998703	0.000739375	0.000738416
39.7241	11.0345	24	2.175	29.5172	2.675	0.0857931	1.08958	-0.476966	0.620664	0.478565	0.382969	0.183275
39.7241	11.0345	60	5.4375	65.5172	5.9375	-3.58621	0.0277032	-4.14897	0.0157807	0.973044	0.0155356	0.0151168
39.7241	11.0345	84	7.6125	89.5172	8.1125	-6.03421	0.0023954	-6.59697	0.0013645	0.99761	0.00136264	0.00135939
39.7241	11.0345	32	2.9	37.5172	3.4	-0.730207	0.481809	-1.29297	0.274456	0.674851	0.215351	0.14533
41.1429	11.4286	58	5.075	63.7143	5.575	-3.16514	0.0422081	-3.748	0.0235648	0.959501	0.0230223	0.0220899
41.1429	11.4286	33	2.8875	38.7143	3.3875	-0.615143	0.540564	-1.198	0.301797	0.649113	0.231831	0.150485
41.1429	11.4286	49	4.2875	54.7143	4.7875	-2.24714	0.105701	-2.83	0.0590129	0.904404	0.0557244	0.0503974
41.1429	11.4286	50	4.375	55.7143	4.875	-2.34914	0.0954509	-2.932	0.0532904	0.912866	0.0505942	0.0461857
41.1429	11.4286	60	5.25	65.7143	5.75	-3.36914	0.0344191	-3.952	0.0192162	0.966726	0.0188539	0.0182266
41.1429	11.4286	63	5.5125	68.7143	6.0125	-3.67514	0.0253458	-4.258	0.0141506	0.975281	0.0139531	0.0136082
41.1429	11.4286	65	5.6875	70.7143	6.1875	-3.87914	0.0206685	-4.462	0.0115393	0.97975	0.0114076	0.0111766
41.7391	11.5942	80	6.9	85.7971	7.4	-5.31791	0.00490298	-5.90922	0.00271431	0.995121	0.00270696	0.00269376
42.6667	11.8519	3	0.253125	8.92593	0.753125	2.678	14.556	2.07356	7.95305	0.0642841	0.888306	0.0571039
42.6667	11.8519	47	3.96563	52.9259	4.46563	-1.81	0.163654	-2.41444	0.089417	0.859362	0.0820778	0.0705346
42.6667	11.8519	54	4.55625	59.9259	5.05625	-2.524	0.0801384	-3.12844	0.0437859	0.925807	0.0419491	0.0388368
42.6667	11.8519	80	6.75	85.9259	7.25	-5.176	0.00565056	-5.78044	0.00308734	0.994381	0.00307784	0.00306055
44.3077	12.3077	18	1.4625	24.1538	1.9625	1.39908	4.05146	0.771385	2.16276	0.197963	0.68382	0.135371
44.3077	12.3077	22	1.7875	28.1538	2.2875	0.991077	2.69413	0.363385	1.43819	0.270699	0.58986	0.159675
44.3077	12.3077	48	3.9	54.1538	4.4	-1.66092	0.189964	-2.28862	0.101407	0.840362	0.0920702	0.0773723
44.3077	12.3077	83	6.74375	89.1538	7.24375	-5.23092	0.00534859	-5.85862	0.00285519	0.99468	0.00284707	0.00283192
44.3077	12.3077	86	6.9875	92.1538	7.4875	-5.53692	0.00393863	-6.16462	0.00210253	0.996077	0.00209812	0.00208988
44.6512	12.4031	90	7.25625	96.2016	7.75625	-5.89237	0.00276042	-6.52493	0.00146642	0.997247	0.00146427	0.00146024
46.08	12.8	1	0.078125	7.4	0.578125	3.40424	30.0914	2.75144	15.6652	0.0321632	0.939995	0.0302333
46.08	12.8	8	0.625	14.4	1.125	2.69024	14.7352	2.03744	7.67095	0.0635517	0.884672	0.0562225
46.08	12.8	15	1.17188	21.4	1.67188	1.97624	7.21556	1.32344	3.75632	0.12172	0.789753	0.096129
46.08	12.8	33	2.57812	39.4	3.07812	0.14024	1.15055	-0.51256	0.59896	0.464997	0.374594	0.174185
46.08	12.8	45	3.51562	51.4	4.01562	-1.08376	0.338321	-1.73656	0.176125	0.747205	0.14975	0.111894
46.08	12.8	49	3.82812	55.4	4.32812	-1.49176	0.224976	-2.14456	0.11712	0.816342	0.104841	0.0855859
46.08	12.8	78	6.09375	84.4	6.59375	-4.44976	0.0116814	-5.10256	0.00608116	0.988454	0.0060444	0.00597461
46.08	12.8	80	6.25	86.4	6.75	-4.65376	0.00952572	-5.30656	0.00495896	0.990564	0.00493449	0.00488793
46.08	12.8	90	7.03125	96.4	7.53125	-5.67376	0.00343493	-6.32656	0.00178817	0.996577	0.00178498	0.00177887
46.08	12.8	90	7.03125	96.4	7.53125	-5.67376	0.00343493	-6.32656	0.00178817	0.996577	0.00178498	0.00177887
47.6033	13.2231	82	6.20125	88.6116	6.70125	-4.62469	0.00980665	-5.29907	0.00499622	0.990289	0.00497138	0.0049231
48	13.3333	66	4.95	72.6667	5.45	-2.932	0.0532904	-3.612	0.0269978	0.949406	0.0262881	0.0249581
48	13.3333	3	0.225	9.66667	0.725	3.494	32.9174	2.814	16.6765	0.0294834	0.943428	0.0278155
48	13.3333	16	1.2	22.6667	1.7	2.168	8.74078	1.488	4.42823	0.102661	0.815778	0.0837487
48	13.3333	46	3.45	52.6667	3.95	-0.892	0.409835	-1.572	0.20763	0.709303	0.171931	0.121951
48	13.3333	49	3.675	55.6667	4.175	-1.198	0.301797	-1.878	0.152896	0.768169	0.132619	0.101874
48	13.3333	65	4.875	71.6667	5.375	-2.83	0.0590129	-3.51	0.0298969	0.944276	0.029029	0.0274114
48	13.3333	66	4.95	72.6667	5.45	-2.932	0.0532904	-3.612	0.0269978	0.949406	0.0262881	0.0249581
48	13.3333	84	6.3	90.6667	6.8	-4.768	0.00849736	-5.448	0.00430491	0.991574	0.00428645	0.00425034
50.087	13.913	13	0.934375	19.9565	1.43438	2.7933	16.3349	2.08374	8.03445	0.0576871	0.889313	0.0513018
50.087	13.913	3	0.215625	9.95652	0.715625	3.8133	45.2999	3.10374	22.2811	0.0215983	0.957047	0.0206706
50.087	13.913	4	0.2875	10.9565	0.7875	3.7113	40.9071	3.00174	20.1205	0.0238623	0.952653	0.0227325
50.087	13.913	12	0.8625	18.9565	1.3625	2.8953	18.089	2.18574	8.89722	0.0523862	0.898962	0.0470932
50.087	13.913	15	1.07812	21.9565	1.57812	2.5893	13.3205	1.87974	6.5518	0.06983	0.867581	0.0605832
50.087	13.913	47	3.37812	53.9565	3.87812	-0.674696	0.509311	-1.38426	0.250509	0.662554	0.200326	0.132726
50.087	13.913	66	4.74375	72.9565	5.24375	-2.6127	0.0733366	-3.32226	0.0360712	0.931674	0.0348154	0.0324366
52.3636	14.5455	2	0.1375	9.27273	0.6375	4.26364	71.0679	3.52182	33.8459	0.0138758	0.971302	0.0134776
52.3636	14.5455	6	0.4125	13.2727	0.9125	3.85564	47.2587	3.11382	22.5068	0.0207217	0.957459	0.0198401
52.3636	14.5455	6	0.4125	13.2727	0.9125	3.85564	47.2587	3.11382	22.5068	0.0207217	0.957459	0.0198401
52.3636	14.5455	8	0.55	15.2727	1.05	3.65164	38.5377	2.90982	18.3535	0.0252923	0.94833	0.0239855
52.3636	14.5455	10	0.6875	17.2727	1.1875	3.44764	31.426	2.70582	14.9666	0.0308394	0.937369	0.0289079
52.3636	14.5455	10	0.6875	17.2727	1.1875	3.44764	31.426	2.70582	14.9666	0.0308394	0.937369	0.0289079
52.3636	14.5455	10	0.6875	17.2727	1.1875	3.44764	31.426	2.70582	14.9666	0.0308394	0.937369	0.0289079
52.3636	14.5455	15	1.03125	22.2727	1.53125	2.93764	18.8712	2.19582	8.98735	0.0503241	0.899873	0.0452853
52.3636	14.5455	80	5.5	87.2727	6	-3.69236	0.024913	-4.43418	0.0118648	0.975693	0.0117256	0.0114406
52.3636	14.5455	87	5.98125	94.2727	6.48125	-4.40636	0.0121995	-5.14818	0.00580996	0.987948	0.0057764	0.00570678
52.3636	14.5455	76	5.225	83.2727	5.725	-3.28436	0.0374644	-4.02618	0.0178423	0.963888	0.0175296	0.0168965
52.3636	14.5455	8	0.55	15.2727	1.05	3.65164	38.5377	2.90982	18.3535	0.0252923	0.94833	0.0239855
52.3636	14.5455	14	0.9625	21.2727	1.4625	3.03964	20.8976	2.29782	9.95244	0.045667	0.908696	0.0414974
52.3636	14.5455	16	1.1	23.2727	1.6	2.83564	17.0412	2.09382	8.11584	0.0554286	0.890301	0.0493481
52.3636	14.5455	50	3.4375	57.2727	3.9375	-0.632364	0.531334	-1.37418	0.253047	0.653025	0.201945	0.131875
53.3333	14.8148	2	0.135	9.40741	0.635	4.412	82.4342	3.65644	38.7234	0.0119855	0.974826	0.0116838
53.8318	14.9533	87	5.81813	94.4766	6.31813	-4.18174	0.0152719	-4.94436	0.00712351	0.984958	0.00707312	0.00696673
54.8571	15.2381	15	0.984375	22.619	1.48438	3.31914	27.6367	2.542	12.7051	0.0349203	0.927034	0.0323723
54.8571	15.2381	14	0.91875	21.619	1.41875	3.42114	30.6044	2.644	14.0694	0.0316412	0.93364	0.0295415
54.8571	15.2381	15	0.984375	22.619	1.48438	3.31914	27.6367	2.542	12.7051	0.0349203	0.927034	0.0323723
54.8571	15.2381	63	4.13438	70.619	4.63438	-1.57686	0.206623	-2.354	0.0949884	0.828759	0.0867484	0.0718935
54.8571	15.2381	80	5.25	87.619	5.75	-3.31086	0.0364849	-4.088	0.0167727	0.964799	0.0164961	0.0159154
54.8571	15.2381	86	5.64375	93.619	6.14375	-3.92286	0.0197845	-4.7	0.00909528	0.980599	0.0090133	0.00883843
54.8571	15.2381	49	3.21563	56.619	3.71563	-0.148857	0.861692	-0.926	0.396135	0.537146	0.283737	0.152408
54.8571	15.2381	70	4.59375	77.619	5.09375	-2.29086	0.10118	-3.068	0.0465141	0.908117	0.0444467	0.0403628
54.8571	15.2381	82	5.38125	89.619	5.88125	-3.51486	0.0297521	-4.292	0.0136775	0.971108	0.013493	0.0131031
54.8571	15.2381	60	3.9375	67.619	4.4375	-1.27086	0.280591	-2.048	0.128993	0.780889	0.114255	0.0892202
54.8571	15.2381	67	4.39687	74.619	4.89687	-1.98486	0.1374	-2.762	0.0631653	0.879198	0.0594125	0.0522354
54.8571	15.2381	2	0.13125	9.61905	0.63125	4.64514	104.078	3.868	47.8466	0.00951672	0.979528	0.00932189
54.8571	15.2381	3	0.196875	10.619	0.696875	4.54314	93.9857	3.766	43.2069	0.0105279	0.977379	0.0102897
54.8571	15.2381	4	0.2625	11.619	0.7625	4.44114	84.8719	3.664	39.0171	0.0116453	0.975011	0.0113542
54.8571	15.2381	8	0.525	15.619	1.025	4.03314	56.438	3.256	25.9455	0.0174101	0.962888	0.016764
54.8571	15.2381	15	0.984375	22.619	1.48437	3.31914	27.6367	2.542	12.7051	0.0349203	0.927034	0.0323723
54.8571	15.2381	50	3.28125	57.619	3.78125	-0.250857	0.778134	-1.028	0.357722	0.562387	0.263472	0.148173
54.8571	15.2381	61	4.00312	68.619	4.50312	-1.37286	0.253382	-2.15	0.116484	0.797841	0.104331	0.0832398
54.8571	15.2381	83	5.44687	90.619	5.94687	-3.61686	0.026867	-4.394	0.0123512	0.973836	0.0122005	0.0118813
56.4706	15.6863	10	0.6375	17.8431	1.1375	4.076	58.9094	3.276	26.4697	0.0166919	0.963596	0.0160842
57.6	16	1	0.0625	9	0.5625	5.1668	175.353	4.3508	77.5405	0.00567045	0.987268	0.00559825
57.6	16	2	0.125	10	0.625	5.0648	158.349	4.2488	70.0213	0.00627554	0.98592	0.00618718
57.6	16	3	0.1875	11	0.6875	4.9628	142.994	4.1468	63.2313	0.00694475	0.984431	0.00683663
57.6	16	4	0.25	12	0.75	4.8608	129.127	4.0448	57.0998	0.00768477	0.982788	0.0075525
57.6	16	4	0.25	12	0.75	4.8608	129.127	4.0448	57.0998	0.00768477	0.982788	0.0075525
57.6	16	6	0.375	14	0.875	4.6568	105.299	3.8408	46.5627	0.00940746	0.978975	0.00920967
57.6	16	10	0.625	18	1.125	4.2488	70.0213	3.4328	30.9632	0.0140803	0.968714	0.0136398
57.6	16	10	0.625	18	1.125	4.2488	70.0213	3.4328	30.9632	0.0140803	0.968714	0.0136398
57.6	16	15	0.9375	23	1.4375	3.7388	42.0475	2.9228	18.5933	0.0232302	0.948962	0.0220445
57.6	16	15	0.9375	23	1.4375	3.7388	42.0475	2.9228	18.5933	0.0232302	0.948962	0.0220445
57.6	16	16	1	24	1.5	3.6368	37.9701	2.8208	16.7903	0.0256607	0.94379	0.0242183
57.6	16	17	1.0625	25	1.5625	3.5348	34.2882	2.7188	15.1621	0.0283381	0.938127	0.0265848
57.6	16	17	1.0625	25	1.5625	3.5348	34.2882	2.7188	15.1621	0.0283381	0.938127	0.0265848
57.6	16	17	1.0625	25	1.5625	3.5348	34.2882	2.7188	15.1621	0.0283381	0.938127	0.0265848
57.6	16	18	1.125	26	1.625	3.4328	30.9632	2.6168	13.6918	0.031286	0.931935	0.0291565
57.6	16	22	1.375	30	1.875	3.0248	20.5899	2.2088	9.10478	0.046318	0.901037	0.0417342
57.6	16	31	1.9375	39	2.4375	2.1068	8.22189	1.2908	3.63569	0.108438	0.784283	0.0850458
57.6	16	50	3.125	58	3.625	0.1688	1.18388	-0.6472	0.52351	0.4579	0.343621	0.157344
57.6	16	50	3.125	58	3.625	0.1688	1.18388	-0.6472	0.52351	0.4579	0.343621	0.157344
57.6	16	50	3.125	58	3.625	0.1688	1.18388	-0.6472	0.52351	0.4579	0.343621	0.157344
57.6	16	62	3.875	70	4.375	-1.0552	0.348123	-1.8712	0.153939	0.741772	0.133403	0.0989546
57.6	16	63	3.9375	71	4.4375	-1.1572	0.314365	-1.9732	0.139011	0.760824	0.122046	0.0928552
57.6	16	65	4.0625	73	4.5625	-1.3612	0.256353	-2.1772	0.113358	0.795955	0.101817	0.0810415
57.6	16	66	4.125	74	4.625	-1.4632	0.231494	-2.2792	0.102366	0.812022	0.0928603	0.0754046
57.6	16	72	4.5	80	5	-2.0752	0.125531	-2.8912	0.0555096	0.888469	0.0525903	0.0467249
57.6	16	77	4.8125	85	5.3125	-2.5852	0.075381	-3.4012	0.0333332	0.929903	0.032258	0.0299968
57.6	16	78	4.875	86	5.375	-2.6872	0.0680713	-3.5032	0.0301009	0.936267	0.0292213	0.027359
57.6	16	30	1.875	38	2.375	2.2088	9.10478	1.3928	4.02611	0.098963	0.801039	0.0792732
57.6	16	51	3.1875	59	3.6875	0.0668	1.06908	-0.7492	0.472745	0.483306	0.320996	0.155139
58.7755	16.3265	75	4.59375	83.1633	5.09375	-2.20135	0.110654	-3.034	0.0481228	0.90037	0.0459133	0.041339
59.3814	16.4948	45	2.72813	53.2474	3.22813	0.951361	2.58923	0.110124	1.11642	0.278611	0.527503	0.146968
60	16.6667	80	4.8	88.3333	5.3	-2.524	0.0801384	-3.374	0.0342524	0.925807	0.033118	0.0306609
60.6316	16.8421	15	0.890625	23.4211	1.39063	4.20263	66.8621	3.34368	28.3233	0.0147358	0.965897	0.0142332
60.6316	16.8421	20	1.1875	28.4211	1.6875	3.69263	40.1504	2.83368	17.008	0.0243011	0.944469	0.0229517
60.6316	16.8421	49	2.90938	57.4211	3.40938	0.734632	2.08471	-0.124316	0.883101	0.324179	0.468961	0.152027
60.6316	16.8421	46	2.73125	54.4211	3.23125	1.04063	2.831	0.181684	1.19924	0.261028	0.545297	0.142338
60.6316	16.8421	17	1.00938	25.4211	1.50938	3.99863	54.5235	3.13968	23.0966	0.0180104	0.9585	0.017263
60.6316	16.8421	20	1.1875	28.4211	1.6875	3.69263	40.1504	2.83368	17.008	0.0243011	0.944469	0.0229517
60.6316	16.8421	49	2.90938	57.4211	3.40938	0.734632	2.08471	-0.124316	0.883101	0.324179	0.468961	0.152027
60.6316	16.8421	49	2.90938	57.4211	3.40938	0.734632	2.08471	-0.124316	0.883101	0.324179	0.468961	0.152027
60.6316	16.8421	20	1.1875	28.4211	1.6875	3.69263	40.1504	2.83368	17.008	0.0243011	0.944469	0.0229517
60.6316	16.8421	20	1.1875	28.4211	1.6875	3.69263	40.1504	2.83368	17.008	0.0243011	0.944469	0.0229517
60.6316	16.8421	23	1.36562	31.4211	1.86562	3.38663	29.5662	2.52768	12.5245	0.0327159	0.92606	0.0302969
60.6316	16.8421	48	2.85	56.4211	3.35	0.836632	2.30858	-0.0223158	0.977931	0.302245	0.494421	0.149436
60.6316	16.8421	82	4.86875	90.4211	5.36875	-2.63137	0.0719799	-3.49032	0.0304912	0.932853	0.029589	0.0276022
60.6316	16.8421	88	5.225	96.4211	5.725	-3.24337	0.0390322	-4.10232	0.0165343	0.962434	0.0162654	0.0156544
60.6316	16.8421	5	0.296875	13.4211	0.796875	5.22263	185.421	4.36368	78.546	0.00536419	0.987429	0.00529675
60.6316	16.8421	15	0.890625	23.4211	1.39062	4.20263	66.8621	3.34368	28.3233	0.0147358	0.965897	0.0142332
60.6316	16.8421	32	1.9	40.4211	2.4	2.46863	11.8063	1.60968	5.00123	0.0780867	0.833368	0.0650749
60.6316	16.8421	33	1.95937	41.4211	2.45937	2.36663	10.6614	1.50768	4.51626	0.0857529	0.818718	0.0702074
60.6316	16.8421	49	2.90937	57.4211	3.40937	0.734632	2.08471	-0.124316	0.883101	0.324179	0.468961	0.152027
62.6087	17.3913	49	2.8175	57.6957	3.3175	1.03713	2.82111	0.150174	1.16204	0.261704	0.537473	0.140659
64	17.7778	77	4.33125	85.8889	4.83125	-1.606	0.200689	-2.51267	0.0810518	0.832855	0.074975	0.0624433
64	17.7778	18	1.0125	26.8889	1.5125	4.412	82.4342	3.50533	33.2925	0.0119855	0.970839	0.011636
64	17.7778	35	1.96875	43.8889	2.46875	2.678	14.556	1.77133	5.87869	0.0642841	0.854623	0.0549387
64	17.7778	22	1.2375	30.8889	1.7375	4.004	54.817	3.09733	22.1388	0.0179157	0.956783	0.0171414
64	17.7778	85	4.78125	93.8889	5.28125	-2.422	0.088744	-3.32867	0.0358409	0.91849	0.0346007	0.0317804
64	17.7778	17	0.95625	25.8889	1.45625	4.514	91.2862	3.60733	36.8676	0.0108359	0.973592	0.0105497
64	17.7778	24	1.35	32.8889	1.85	3.8	44.7012	2.89333	18.0534	0.0218813	0.947516	0.0207329
64	17.7778	32	1.8	40.8889	2.3	2.984	19.7667	2.07733	7.98315	0.048154	0.888681	0.0427935
64	17.7778	33	1.85625	41.8889	2.35625	2.882	17.8499	1.97533	7.20902	0.0530506	0.878183	0.0465881
64	17.7778	36	2.025	44.8889	2.525	2.576	13.1445	1.66933	5.30863	0.0706991	0.841487	0.0594924
64	17.7778	38	2.1375	46.8889	2.6375	2.372	10.7188	1.46533	4.32899	0.0853329	0.812347	0.0693199
64	17.7778	47	2.64375	55.8889	3.14375	1.454	4.2802	0.547333	1.72864	0.189387	0.633517	0.11998
64	17.7778	49	2.75625	57.8889	3.25625	1.25	3.49034	0.343333	1.40964	0.2227	0.585	0.13028
65.4545	18.1818	81	4.455	90.0909	4.955	-1.79145	0.166717	-2.71873	0.0659586	0.857106	0.0618773	0.0530354
67.7647	18.8235	17	0.903125	26.4118	1.40313	5.09	162.39	4.13	62.1779	0.00612033	0.984172	0.00602346
67.7647	18.8235	18	0.95625	27.4118	1.45625	4.988	146.643	4.028	56.1485	0.0067731	0.982502	0.00665458
67.7647	18.8235	20	1.0625	29.4118	1.5625	4.784	119.582	3.824	45.787	0.00829313	0.978627	0.00811588
67.7647	18.8235	33	1.75313	42.4118	2.25313	3.458	31.7534	2.498	12.1582	0.0305312	0.924001	0.0282109
67.7647	18.8235	45	2.39063	54.4118	2.89063	2.234	9.33714	1.274	3.57512	0.0967386	0.781427	0.0755941
67.7647	18.8235	66	3.50625	75.4118	4.00625	0.092	1.09636	-0.868	0.41979	0.477016	0.295671	0.14104
67.7647	18.8235	18	0.95625	27.4118	1.45625	4.988	146.643	4.028	56.1485	0.0067731	0.982502	0.00665458
71.1111	19.7531	79	3.99938	88.8765	4.49938	-0.722	0.48578	-1.72941	0.177389	0.673047	0.150663	0.101404
76.8	21.3333	16	0.75	26.6667	1.25	6.5744	716.516	5.4864	241.387	0.0013937	0.995874	0.00138795
82.2857	22.8571	56	2.45	67.4286	2.95	3.33371	28.0423	2.168	8.74078	0.0344325	0.897339	0.0308976
headway1.0
黄灯启亮时的速度_decision speed（km/h）	decision speed(m/s)	黄灯启亮时的距离_leading(m)	Estimated time to stop line_leading(s)	黄灯启亮时的距离_following	Estimated Time to Stop Line_following	logit（p）_leading	EXP_leading	logit（p）_following	EXP_following	P(stop)_leading	P(cross)_following	P(rear-end)
19.2	5.33333	8	1.5	13.3333	2.5	-1.4224	0.241135	-1.9664	0.13996	0.805714	0.122776	0.0989225
19.2	5.33333	15	2.8125	20.3333	3.8125	-2.1364	0.118079	-2.6804	0.0685357	0.894391	0.0641399	0.0573661
20.5714	5.71429	45	7.875	50.7143	8.875	-4.98657	0.00682904	-5.56943	0.00381266	0.993217	0.00379818	0.00377242
22.5882	6.27451	66	10.5187	72.2745	11.5187	-6.82	0.00109172	-7.46	0.000575656	0.998909	0.000575325	0.000574698
27.4286	7.61905	81	10.6313	88.619	11.6313	-7.60943	0.000495755	-8.38657	0.000227907	0.999504	0.000227855	0.000227743
28.0976	7.80488	51	6.53438	58.8049	7.53438	-4.44707	0.0117128	-5.24317	0.00528348	0.988423	0.00525571	0.00519486
28.0976	7.80488	49	6.27812	56.8049	7.27812	-4.24307	0.0143634	-5.03917	0.00647912	0.98584	0.00643741	0.00634626
29.5385	8.20513	66	8.04375	74.2051	9.04375	-5.75662	0.00316179	-6.59354	0.00136919	0.996848	0.00136731	0.001363
32	8.88889	80	9	88.8889	10	-6.808	0.0011049	-7.71467	0.000446234	0.998896	0.000446035	0.000445543
32.9143	9.14286	60	6.5625	69.1429	7.5625	-4.62811	0.00977317	-5.56069	0.00384614	0.990321	0.0038314	0.00379432
33.8824	9.41176	35	3.71875	44.4118	4.71875	-1.93	0.145148	-2.89	0.0555762	0.873249	0.0526501	0.0459767
33.8824	9.41176	66	7.0125	75.4118	8.0125	-5.092	0.00614572	-6.052	0.00235315	0.993892	0.00234763	0.00233329
34.491	9.58084	90	9.39375	99.5808	10.3938	-7.44687	0.000583262	-8.42412	0.000219508	0.999417	0.00021946	0.000219332
34.9091	9.69697	80	8.25	89.697	9.25	-6.36291	0.00172434	-7.352	0.000641308	0.998279	0.000640897	0.000639794
34.9091	9.69697	90	9.28125	99.697	10.2812	-7.38291	0.000621789	-8.372	0.000231253	0.999379	0.000231199	0.000231055
36	10	49	4.9	59	5.9	-3.034	0.0481228	-4.054	0.0173528	0.954087	0.0170568	0.0162737
36	10	40	4	50	5	-2.116	0.120513	-3.136	0.0434563	0.892449	0.0416465	0.0371673
36.4557	10.1266	50	4.9375	60.1266	5.9375	-3.06628	0.0465942	-4.09919	0.0165861	0.95548	0.0163155	0.0155891
37.1613	10.3226	74	7.16875	84.3226	8.16875	-5.40632	0.00448811	-6.45923	0.00156601	0.995532	0.00156356	0.00155657
37.1613	10.3226	82	7.94375	92.3226	8.94375	-6.22232	0.00198463	-7.27523	0.000692484	0.998019	0.000692005	0.000690634
37.1613	10.3226	89	8.62187	99.3226	9.62187	-6.93632	0.000971837	-7.98923	0.000339097	0.999029	0.000338982	0.000338652
37.1613	10.3226	60	5.8125	70.3226	6.8125	-3.97832	0.018717	-5.03123	0.0065308	0.981627	0.00648843	0.00636921
37.1613	10.3226	85	8.23437	95.3226	9.23437	-6.52832	0.00146146	-7.58123	0.000509936	0.998541	0.000509676	0.000508932
38.4	10.6667	68	6.375	78.6667	7.375	-4.6048	0.0100037	-5.6928	0.00337014	0.990095	0.00335882	0.00332556
38.4	10.6667	84	7.875	94.6667	8.875	-6.2368	0.00195611	-7.3248	0.000658991	0.998048	0.000658557	0.000657272
39.7241	11.0345	90	8.15625	101.034	9.15625	-6.64621	0.00129894	-7.77172	0.000421486	0.998703	0.000421308	0.000420762
39.7241	11.0345	24	2.175	35.0345	3.175	0.0857931	1.08958	-1.03972	0.353552	0.478565	0.261203	0.125003
39.7241	11.0345	60	5.4375	71.0345	6.4375	-3.58621	0.0277032	-4.71172	0.00898927	0.973044	0.00890918	0.00866902
39.7241	11.0345	84	7.6125	95.0345	8.6125	-6.03421	0.0023954	-7.15972	0.000777269	0.99761	0.000776665	0.000774809
39.7241	11.0345	32	2.9	43.0345	3.9	-0.730207	0.481809	-1.85572	0.15634	0.674851	0.135202	0.0912413
41.1429	11.4286	58	5.075	69.4286	6.075	-3.16514	0.0422081	-4.33086	0.0131563	0.959501	0.0129854	0.0124595
41.1429	11.4286	33	2.8875	44.4286	3.8875	-0.615143	0.540564	-1.78086	0.168494	0.649113	0.144197	0.0936004
41.1429	11.4286	49	4.2875	60.4286	5.2875	-2.24714	0.105701	-3.41286	0.0329469	0.904404	0.0318961	0.0288469
41.1429	11.4286	50	4.375	61.4286	5.375	-2.34914	0.0954509	-3.51486	0.0297521	0.912866	0.0288924	0.0263749
41.1429	11.4286	60	5.25	71.4286	6.25	-3.36914	0.0344191	-4.53486	0.0107284	0.966726	0.0106146	0.0102614
41.1429	11.4286	63	5.5125	74.4286	6.5125	-3.67514	0.0253458	-4.84086	0.00790028	0.975281	0.00783835	0.0076446
41.1429	11.4286	65	5.6875	76.4286	6.6875	-3.87914	0.0206685	-5.04486	0.00644238	0.97975	0.00640114	0.00627152
41.7391	11.5942	80	6.9	91.5942	7.9	-5.31791	0.00490298	-6.50052	0.00150265	0.995121	0.0015004	0.00149308
42.6667	11.8519	3	0.253125	14.8519	1.25313	2.678	14.556	1.46911	4.34537	0.0642841	0.812922	0.052258
42.6667	11.8519	47	3.96563	58.8519	4.96563	-1.81	0.163654	-3.01889	0.0488555	0.859362	0.0465798	0.0400289
42.6667	11.8519	54	4.55625	65.8519	5.55625	-2.524	0.0801384	-3.73289	0.0239236	0.925807	0.0233647	0.0216312
42.6667	11.8519	80	6.75	91.8519	7.75	-5.176	0.00565056	-6.38489	0.00168686	0.994381	0.00168402	0.00167455
44.3077	12.3077	18	1.4625	30.3077	2.4625	1.39908	4.05146	0.143692	1.15453	0.197963	0.535861	0.106081
44.3077	12.3077	22	1.7875	34.3077	2.7875	0.991077	2.69413	-0.264308	0.767737	0.270699	0.434305	0.117566
44.3077	12.3077	48	3.9	60.3077	4.9	-1.66092	0.189964	-2.91631	0.0541332	0.840362	0.0513533	0.0431553
44.3077	12.3077	83	6.74375	95.3077	7.74375	-5.23092	0.00534859	-6.48631	0.00152417	0.99468	0.00152185	0.00151375
44.3077	12.3077	86	6.9875	98.3077	7.9875	-5.53692	0.00393863	-6.79231	0.00112238	0.996077	0.00112112	0.00111672
44.6512	12.4031	90	7.25625	102.403	8.25625	-5.89237	0.00276042	-7.15749	0.000779009	0.997247	0.000778402	0.000776259
46.08	12.8	1	0.078125	13.8	1.07812	3.40424	30.0914	2.09864	8.15507	0.0321632	0.890771	0.0286501
46.08	12.8	8	0.625	20.8	1.625	2.69024	14.7352	1.38464	3.99339	0.0635517	0.799735	0.0508246
46.08	12.8	15	1.17188	27.8	2.17188	1.97624	7.21556	0.67064	1.95549	0.12172	0.661646	0.0805358
46.08	12.8	33	2.57812	45.8	3.57812	0.14024	1.15055	-1.16536	0.31181	0.464997	0.237695	0.110527
46.08	12.8	45	3.51562	57.8	4.51562	-1.08376	0.338321	-2.38936	0.0916883	0.747205	0.0839877	0.062756
46.08	12.8	49	3.82812	61.8	4.82812	-1.49176	0.224976	-2.79736	0.0609708	0.816342	0.057467	0.0469127
46.08	12.8	78	6.09375	90.8	7.09375	-4.44976	0.0116814	-5.75536	0.00316577	0.988454	0.00315578	0.00311934
46.08	12.8	80	6.25	92.8	7.25	-4.65376	0.00952572	-5.95936	0.00258156	0.990564	0.00257492	0.00255062
46.08	12.8	90	7.03125	102.8	8.03125	-5.67376	0.00343493	-6.97936	0.000930899	0.996577	0.000930033	0.000926849
46.08	12.8	90	7.03125	102.8	8.03125	-5.67376	0.00343493	-6.97936	0.000930899	0.996577	0.000930033	0.000926849
47.6033	13.2231	82	6.20125	95.2231	7.20125	-4.62469	0.00980665	-5.97345	0.00254543	0.990289	0.00253897	0.00251431
48	13.3333	66	4.95	79.3333	5.95	-2.932	0.0532904	-4.292	0.0136775	0.949406	0.013493	0.0128103
48	13.3333	3	0.225	16.3333	1.225	3.494	32.9174	2.134	8.44859	0.0294834	0.894164	0.026363
48	13.3333	16	1.2	29.3333	2.2	2.168	8.74078	0.808	2.24342	0.102661	0.691683	0.071009
48	13.3333	46	3.45	59.3333	4.45	-0.892	0.409835	-2.252	0.105189	0.709303	0.0951771	0.0675094
48	13.3333	49	3.675	62.3333	4.675	-1.198	0.301797	-2.558	0.0774595	0.768169	0.0718909	0.0552243
48	13.3333	65	4.875	78.3333	5.875	-2.83	0.0590129	-4.19	0.0151463	0.944276	0.0149203	0.0140889
48	13.3333	66	4.95	79.3333	5.95	-2.932	0.0532904	-4.292	0.0136775	0.949406	0.013493	0.0128103
48	13.3333	84	6.3	97.3333	7.3	-4.768	0.00849736	-6.128	0.00218094	0.991574	0.00217619	0.00215786
50.087	13.913	13	0.934375	26.913	1.93438	2.7933	16.3349	1.37417	3.95181	0.0576871	0.798054	0.0460374
50.087	13.913	3	0.215625	16.913	1.21562	3.8133	45.2999	2.39417	10.9591	0.0215983	0.916382	0.0197923
50.087	13.913	4	0.2875	17.913	1.2875	3.7113	40.9071	2.29217	9.89643	0.0238623	0.908227	0.0216724
50.087	13.913	12	0.8625	25.913	1.8625	2.8953	18.089	1.47617	4.37617	0.0523862	0.813994	0.042642
50.087	13.913	15	1.07812	28.913	2.07812	2.5893	13.3205	1.17017	3.22255	0.06983	0.763176	0.0532926
50.087	13.913	47	3.37812	60.913	4.37812	-0.674696	0.509311	-2.09383	0.123215	0.662554	0.109698	0.0726811
50.087	13.913	66	4.74375	79.913	5.74375	-2.6127	0.0733366	-4.03183	0.0177419	0.931674	0.0174326	0.0162415
52.3636	14.5455	2	0.1375	16.5455	1.1375	4.26364	71.0679	2.78	16.119	0.0138758	0.941585	0.0130652
52.3636	14.5455	6	0.4125	20.5455	1.4125	3.85564	47.2587	2.372	10.7188	0.0207217	0.914667	0.0189534
52.3636	14.5455	6	0.4125	20.5455	1.4125	3.85564	47.2587	2.372	10.7188	0.0207217	0.914667	0.0189534
52.3636	14.5455	8	0.55	22.5455	1.55	3.65164	38.5377	2.168	8.74078	0.0252923	0.897339	0.0226958
52.3636	14.5455	10	0.6875	24.5455	1.6875	3.44764	31.426	1.964	7.12778	0.0308394	0.876965	0.0270451
52.3636	14.5455	10	0.6875	24.5455	1.6875	3.44764	31.426	1.964	7.12778	0.0308394	0.876965	0.0270451
52.3636	14.5455	10	0.6875	24.5455	1.6875	3.44764	31.426	1.964	7.12778	0.0308394	0.876965	0.0270451
52.3636	14.5455	15	1.03125	29.5455	2.03125	2.93764	18.8712	1.454	4.2802	0.0503241	0.810613	0.0407934
52.3636	14.5455	80	5.5	94.5455	6.5	-3.69236	0.024913	-5.176	0.00565056	0.975693	0.00561881	0.00548223
52.3636	14.5455	87	5.98125	101.545	6.98125	-4.40636	0.0121995	-5.89	0.00276698	0.987948	0.00275934	0.00272608
52.3636	14.5455	76	5.225	90.5455	6.225	-3.28436	0.0374644	-4.768	0.00849736	0.963888	0.00842576	0.00812149
52.3636	14.5455	8	0.55	22.5455	1.55	3.65164	38.5377	2.168	8.74078	0.0252923	0.897339	0.0226958
52.3636	14.5455	14	0.9625	28.5455	1.9625	3.03964	20.8976	1.556	4.73982	0.045667	0.825779	0.0377108
52.3636	14.5455	16	1.1	30.5455	2.1	2.83564	17.0412	1.352	3.86515	0.0554286	0.794456	0.0440356
52.3636	14.5455	50	3.4375	64.5455	4.4375	-0.632364	0.531334	-2.116	0.120513	0.653025	0.107551	0.0702338
53.3333	14.8148	2	0.135	16.8148	1.135	4.412	82.4342	2.90089	18.1903	0.0119855	0.94789	0.0113609
53.8318	14.9533	87	5.81813	101.953	6.81813	-4.18174	0.0152719	-5.70697	0.00332272	0.984958	0.00331171	0.0032619
54.8571	15.2381	15	0.984375	30.2381	1.98438	3.31914	27.6367	1.76486	5.84074	0.0349203	0.853817	0.0298155
54.8571	15.2381	14	0.91875	29.2381	1.91875	3.42114	30.6044	1.86686	6.46794	0.0316412	0.866094	0.0274043
54.8571	15.2381	15	0.984375	30.2381	1.98438	3.31914	27.6367	1.76486	5.84074	0.0349203	0.853817	0.0298155
54.8571	15.2381	63	4.13438	78.2381	5.13438	-1.57686	0.206623	-3.13114	0.0436679	0.828759	0.0418408	0.0346759
54.8571	15.2381	80	5.25	95.2381	6.25	-3.31086	0.0364849	-4.86514	0.00771073	0.964799	0.00765173	0.00738238
54.8571	15.2381	86	5.64375	101.238	6.64375	-3.92286	0.0197845	-5.47714	0.00418126	0.980599	0.00416385	0.00408307
54.8571	15.2381	49	3.21563	64.2381	4.21563	-0.148857	0.861692	-1.70314	0.18211	0.537146	0.154055	0.0827501
54.8571	15.2381	70	4.59375	85.2381	5.59375	-2.29086	0.10118	-3.84514	0.0213833	0.908117	0.0209357	0.019012
54.8571	15.2381	82	5.38125	97.2381	6.38125	-3.51486	0.0297521	-5.06914	0.00628781	0.971108	0.00624852	0.00606798
54.8571	15.2381	60	3.9375	75.2381	4.9375	-1.27086	0.280591	-2.82514	0.0593002	0.780889	0.0559805	0.0437146
54.8571	15.2381	67	4.39687	82.2381	5.39687	-1.98486	0.1374	-3.53914	0.0290382	0.879198	0.0282188	0.0248099
54.8571	15.2381	2	0.13125	17.2381	1.13125	4.64514	104.078	3.09086	21.9959	0.00951672	0.956514	0.00910288
54.8571	15.2381	3	0.196875	18.2381	1.19687	4.54314	93.9857	2.98886	19.863	0.0105279	0.952068	0.0100233
54.8571	15.2381	4	0.2625	19.2381	1.2625	4.44114	84.8719	2.88686	17.9368	0.0116453	0.947193	0.0110303
54.8571	15.2381	8	0.525	23.2381	1.525	4.03314	56.438	2.47886	11.9276	0.0174101	0.922646	0.0160633
54.8571	15.2381	15	0.984375	30.2381	1.98437	3.31914	27.6367	1.76486	5.84074	0.0349203	0.853817	0.0298155
54.8571	15.2381	50	3.28125	65.2381	4.28125	-0.250857	0.778134	-1.80514	0.164451	0.562387	0.141226	0.0794238
54.8571	15.2381	61	4.00312	76.2381	5.00312	-1.37286	0.253382	-2.92714	0.0535498	0.797841	0.050828	0.0405527
54.8571	15.2381	83	5.44687	98.2381	6.44687	-3.61686	0.026867	-5.17114	0.00567808	0.973836	0.00564602	0.00549829
56.4706	15.6863	10	0.6375	25.6863	1.6375	4.076	58.9094	2.476	11.8936	0.0166919	0.922442	0.0153973
57.6	16	1	0.0625	17	1.0625	5.1668	175.353	3.5348	34.2882	0.00567045	0.971662	0.00550976
57.6	16	2	0.125	18	1.125	5.0648	158.349	3.4328	30.9632	0.00627554	0.968714	0.00607921
57.6	16	3	0.1875	19	1.1875	4.9628	142.994	3.3308	27.9607	0.00694475	0.96547	0.00670495
57.6	16	4	0.25	20	1.25	4.8608	129.127	3.2288	25.2493	0.00768477	0.961904	0.00739201
57.6	16	4	0.25	20	1.25	4.8608	129.127	3.2288	25.2493	0.00768477	0.961904	0.00739201
57.6	16	6	0.375	22	1.375	4.6568	105.299	3.0248	20.5899	0.00940746	0.953682	0.00897173
57.6	16	10	0.625	26	1.625	4.2488	70.0213	2.6168	13.6918	0.0140803	0.931935	0.0131219
57.6	16	10	0.625	26	1.625	4.2488	70.0213	2.6168	13.6918	0.0140803	0.931935	0.0131219
57.6	16	15	0.9375	31	1.9375	3.7388	42.0475	2.1068	8.22189	0.0232302	0.891562	0.0207111
57.6	16	15	0.9375	31	1.9375	3.7388	42.0475	2.1068	8.22189	0.0232302	0.891562	0.0207111
57.6	16	16	1	32	2	3.6368	37.9701	2.0048	7.42461	0.0256607	0.8813	0.0226148
57.6	16	17	1.0625	33	2.0625	3.5348	34.2882	1.9028	6.70464	0.0283381	0.870208	0.0246601
57.6	16	17	1.0625	33	2.0625	3.5348	34.2882	1.9028	6.70464	0.0283381	0.870208	0.0246601
57.6	16	17	1.0625	33	2.0625	3.5348	34.2882	1.9028	6.70464	0.0283381	0.870208	0.0246601
57.6	16	18	1.125	34	2.125	3.4328	30.9632	1.8008	6.05449	0.031286	0.858246	0.0268511
57.6	16	22	1.375	38	2.375	3.0248	20.5899	1.3928	4.02611	0.046318	0.801039	0.0371025
57.6	16	31	1.9375	47	2.9375	2.1068	8.22189	0.4748	1.60769	0.108438	0.616519	0.0668539
57.6	16	50	3.125	66	4.125	0.1688	1.18388	-1.4632	0.231494	0.4579	0.187978	0.0860753
57.6	16	50	3.125	66	4.125	0.1688	1.18388	-1.4632	0.231494	0.4579	0.187978	0.0860753
57.6	16	50	3.125	66	4.125	0.1688	1.18388	-1.4632	0.231494	0.4579	0.187978	0.0860753
57.6	16	62	3.875	78	4.875	-1.0552	0.348123	-2.6872	0.0680713	0.741772	0.0637329	0.0472753
57.6	16	63	3.9375	79	4.9375	-1.1572	0.314365	-2.7892	0.0614704	0.760824	0.0579106	0.0440597
57.6	16	65	4.0625	81	5.0625	-1.3612	0.256353	-2.9932	0.0501268	0.795955	0.047734	0.0379941
57.6	16	66	4.125	82	5.125	-1.4632	0.231494	-3.0952	0.045266	0.812022	0.0433057	0.0351652
57.6	16	72	4.5	88	5.5	-2.0752	0.125531	-3.7072	0.0245462	0.888469	0.0239581	0.021286
57.6	16	77	4.8125	93	5.8125	-2.5852	0.075381	-4.2172	0.0147399	0.929903	0.0145258	0.0135075
57.6	16	78	4.875	94	5.875	-2.6872	0.0680713	-4.3192	0.0133105	0.936267	0.0131357	0.0122985
57.6	16	30	1.875	46	2.875	2.2088	9.10478	0.5768	1.78033	0.098963	0.640331	0.0633691
57.6	16	51	3.1875	67	4.1875	0.0668	1.06908	-1.5652	0.209046	0.483306	0.172902	0.0835645
58.7755	16.3265	75	4.59375	91.3265	5.59375	-2.20135	0.110654	-3.86665	0.0209283	0.90037	0.0204993	0.0184569
59.3814	16.4948	45	2.72813	61.4948	3.72813	0.951361	2.58923	-0.731113	0.481373	0.278611	0.32495	0.0905348
60	16.6667	80	4.8	96.6667	5.8	-2.524	0.0801384	-4.224	0.01464	0.925807	0.0144287	0.0133582
60.6316	16.8421	15	0.890625	31.8421	1.89063	4.20263	66.8621	2.48474	11.998	0.0147358	0.923065	0.0136021
60.6316	16.8421	20	1.1875	36.8421	2.1875	3.69263	40.1504	1.97474	7.20472	0.0243011	0.878119	0.0213393
60.6316	16.8421	49	2.90938	65.8421	3.90938	0.734632	2.08471	-0.983263	0.374088	0.324179	0.272245	0.0882561
60.6316	16.8421	46	2.73125	62.8421	3.73125	1.04063	2.831	-0.677263	0.508005	0.261028	0.336872	0.0879332
60.6316	16.8421	17	1.00938	33.8421	2.00938	3.99863	54.5235	2.28074	9.78389	0.0180104	0.907269	0.0163403
60.6316	16.8421	20	1.1875	36.8421	2.1875	3.69263	40.1504	1.97474	7.20472	0.0243011	0.878119	0.0213393
60.6316	16.8421	49	2.90938	65.8421	3.90938	0.734632	2.08471	-0.983263	0.374088	0.324179	0.272245	0.0882561
60.6316	16.8421	49	2.90938	65.8421	3.90938	0.734632	2.08471	-0.983263	0.374088	0.324179	0.272245	0.0882561
60.6316	16.8421	20	1.1875	36.8421	2.1875	3.69263	40.1504	1.97474	7.20472	0.0243011	0.878119	0.0213393
60.6316	16.8421	20	1.1875	36.8421	2.1875	3.69263	40.1504	1.97474	7.20472	0.0243011	0.878119	0.0213393
60.6316	16.8421	23	1.36562	39.8421	2.36562	3.38663	29.5662	1.66874	5.30546	0.0327159	0.841407	0.0275274
60.6316	16.8421	48	2.85	64.8421	3.85	0.836632	2.30858	-0.881263	0.414259	0.302245	0.292916	0.0885323
60.6316	16.8421	82	4.86875	98.8421	5.86875	-2.63137	0.0719799	-4.34926	0.0129163	0.932853	0.0127516	0.0118954
60.6316	16.8421	88	5.225	104.842	6.225	-3.24337	0.0390322	-4.96126	0.00700407	0.962434	0.00695536	0.00669407
60.6316	16.8421	5	0.296875	21.8421	1.29687	5.22263	185.421	3.50474	33.2727	0.00536419	0.970822	0.00520767
60.6316	16.8421	15	0.890625	31.8421	1.89062	4.20263	66.8621	2.48474	11.998	0.0147358	0.923065	0.0136021
60.6316	16.8421	32	1.9	48.8421	2.9	2.46863	11.8063	0.750737	2.11856	0.0780867	0.679339	0.0530474
60.6316	16.8421	33	1.95937	49.8421	2.95937	2.36663	10.6614	0.648737	1.91312	0.0857529	0.656726	0.0563161
60.6316	16.8421	49	2.90937	65.8421	3.90937	0.734632	2.08471	-0.983263	0.374088	0.324179	0.272245	0.0882561
62.6087	17.3913	49	2.8175	66.3913	3.8175	1.03713	2.82111	-0.736783	0.478651	0.261704	0.323708	0.0847157
64	17.7778	77	4.33125	94.7778	5.33125	-1.606	0.200689	-3.41933	0.0327343	0.832855	0.0316967	0.0263988
64	17.7778	18	1.0125	35.7778	2.0125	4.412	82.4342	2.59867	13.4458	0.0119855	0.930776	0.0111558
64	17.7778	35	1.96875	52.7778	2.96875	2.678	14.556	0.864667	2.37421	0.0642841	0.703635	0.0452325
64	17.7778	22	1.2375	39.7778	2.2375	4.004	54.817	2.19067	8.94117	0.0179157	0.899408	0.0161135
64	17.7778	85	4.78125	102.778	5.78125	-2.422	0.088744	-4.23533	0.014475	0.91849	0.0142684	0.0131054
64	17.7778	17	0.95625	34.7778	1.95625	4.514	91.2862	2.70067	14.8897	0.0108359	0.937066	0.0101539
64	17.7778	24	1.35	41.7778	2.35	3.8	44.7012	1.98667	7.29119	0.0218813	0.87939	0.0192422
64	17.7778	32	1.8	49.7778	2.8	2.984	19.7667	1.17067	3.22414	0.048154	0.763265	0.0367543
64	17.7778	33	1.85625	50.7778	2.85625	2.882	17.8499	1.06867	2.91149	0.0530506	0.744343	0.0394878
64	17.7778	36	2.025	53.7778	3.025	2.576	13.1445	0.762667	2.14399	0.0706991	0.681932	0.048212
64	17.7778	38	2.1375	55.7778	3.1375	2.372	10.7188	0.558667	1.74834	0.0853329	0.636144	0.054284
64	17.7778	47	2.64375	64.7778	3.64375	1.454	4.2802	-0.359333	0.698142	0.189387	0.411121	0.0778609
64	17.7778	49	2.75625	66.7778	3.75625	1.25	3.49034	-0.563333	0.569308	0.2227	0.362777	0.0807904
65.4545	18.1818	81	4.455	99.1818	5.455	-1.79145	0.166717	-3.646	0.0260953	0.857106	0.0254317	0.0217976
67.7647	18.8235	17	0.903125	35.8235	1.90313	5.09	162.39	3.17	23.8075	0.00612033	0.95969	0.00587362
67.7647	18.8235	18	0.95625	36.8235	1.95625	4.988	146.643	3.068	21.4989	0.0067731	0.955553	0.00647206
67.7647	18.8235	20	1.0625	38.8235	2.0625	4.784	119.582	2.864	17.5315	0.00829313	0.946038	0.00784562
67.7647	18.8235	33	1.75313	51.8235	2.75313	3.458	31.7534	1.538	4.65527	0.0305312	0.823174	0.0251325
67.7647	18.8235	45	2.39063	63.8235	3.39063	2.234	9.33714	0.314	1.36889	0.0967386	0.577861	0.0559015
67.7647	18.8235	66	3.50625	84.8235	4.50625	0.092	1.09636	-1.828	0.160735	0.477016	0.138477	0.0660556
67.7647	18.8235	18	0.95625	36.8235	1.95625	4.988	146.643	3.068	21.4989	0.0067731	0.955553	0.00647206
71.1111	19.7531	79	3.99938	98.7531	4.99938	-0.722	0.48578	-2.73681	0.0647763	0.673047	0.0608356	0.0409453
76.8	21.3333	16	0.75	37.3333	1.75	6.5744	716.516	4.3984	81.3207	0.0013937	0.987852	0.00137677
82.2857	22.8571	56	2.45	78.8571	3.45	3.33371	28.0423	1.00229	2.7245	0.0344325	0.731508	0.0251877
headway=1.5
黄灯启亮时的速度_decision speed（km/h）	decision speed(m/s)	黄灯启亮时的距离_leading(m)	Estimated time to stop line_leading(s)	黄灯启亮时的距离_following	Estimated Time to Stop Line_following	logit（p）_leading	EXP_leading	logit（p）_following	EXP_following	P(stop)_leading	P(cross)_following	Probablity(rear-end)
19.2	5.33333	8	1.5	16	3	-1.4224	0.241135	-2.2384	0.106629	0.805714	0.0963548	0.0776344
19.2	5.33333	15	2.8125	23	4.3125	-2.1364	0.118079	-2.9524	0.0522142	0.894391	0.0496232	0.0443825
20.5714	5.71429	45	7.875	53.5714	9.375	-4.98657	0.00682904	-5.86086	0.0028488	0.993217	0.00284071	0.00282144
22.5882	6.27451	66	10.5187	75.4118	12.0187	-6.82	0.00109172	-7.78	0.000418012	0.998909	0.000417838	0.000417382
27.4286	7.61905	81	10.6313	92.4286	12.1313	-7.60943	0.000495755	-8.77514	0.000154527	0.999504	0.000154503	0.000154426
28.0976	7.80488	51	6.53438	62.7073	8.03438	-4.44707	0.0117128	-5.64122	0.00354854	0.988423	0.00353599	0.00349505
28.0976	7.80488	49	6.27812	60.7073	7.77812	-4.24307	0.0143634	-5.43722	0.00435157	0.98584	0.00433271	0.00427136
29.5385	8.20513	66	8.04375	78.3077	9.54375	-5.75662	0.00316179	-7.012	0.000901005	0.996848	0.000900194	0.000897356
32	8.88889	80	9	93.3333	10.5	-6.808	0.0011049	-8.168	0.000283585	0.998896	0.000283504	0.000283191
32.9143	9.14286	60	6.5625	73.7143	8.0625	-4.62811	0.00977317	-6.02697	0.00241279	0.990321	0.00240698	0.00238369
33.8824	9.41176	35	3.71875	49.1176	5.21875	-1.93	0.145148	-3.37	0.0343896	0.873249	0.0332463	0.0290323
33.8824	9.41176	66	7.0125	80.1176	8.5125	-5.092	0.00614572	-6.532	0.00145609	0.993892	0.00145397	0.00144509
34.491	9.58084	90	9.39375	104.371	10.8938	-7.44687	0.000583262	-8.91274	0.000134662	0.999417	0.000134644	0.000134565
34.9091	9.69697	80	8.25	94.5455	9.75	-6.36291	0.00172434	-7.84655	0.000391101	0.998279	0.000390948	0.000390275
34.9091	9.69697	90	9.28125	104.545	10.7812	-7.38291	0.000621789	-8.86655	0.000141029	0.999379	0.000141009	0.000140921
36	10	49	4.9	64	6.4	-3.034	0.0481228	-4.564	0.0104203	0.954087	0.0103128	0.00983934
36	10	40	4	55	5.5	-2.116	0.120513	-3.646	0.0260953	0.892449	0.0254317	0.0226964
36.4557	10.1266	50	4.9375	65.1899	6.4375	-3.06628	0.0465942	-4.61565	0.00989579	0.95548	0.00979883	0.00936258
37.1613	10.3226	74	7.16875	89.4839	8.66875	-5.40632	0.00448811	-6.98568	0.000925036	0.995532	0.000924182	0.000920052
37.1613	10.3226	82	7.94375	97.4839	9.44375	-6.22232	0.00198463	-7.80168	0.000409048	0.998019	0.000408881	0.000408071
37.1613	10.3226	89	8.62187	104.484	10.1219	-6.93632	0.000971837	-8.51568	0.000200303	0.999029	0.000200263	0.000200069
37.1613	10.3226	60	5.8125	75.4839	7.3125	-3.97832	0.018717	-5.55768	0.00385773	0.981627	0.0038429	0.00377229
37.1613	10.3226	85	8.23437	100.484	9.73437	-6.52832	0.00146146	-8.10768	0.000301218	0.998541	0.000301127	0.000300688
38.4	10.6667	68	6.375	84	7.875	-4.6048	0.0100037	-6.2368	0.00195611	0.990095	0.00195229	0.00193295
38.4	10.6667	84	7.875	100	9.375	-6.2368	0.00195611	-7.8688	0.000382493	0.998048	0.000382347	0.0003816
39.7241	11.0345	90	8.15625	106.552	9.65625	-6.64621	0.00129894	-8.33448	0.000240093	0.998703	0.000240036	0.000239724
39.7241	11.0345	24	2.175	40.5517	3.675	0.0857931	1.08958	-1.60248	0.201396	0.478565	0.167635	0.0802242
39.7241	11.0345	60	5.4375	76.5517	6.9375	-3.58621	0.0277032	-5.27448	0.0051206	0.973044	0.00509452	0.00495719
39.7241	11.0345	84	7.6125	100.552	9.1125	-6.03421	0.0023954	-7.72248	0.00044276	0.99761	0.000442564	0.000441506
39.7241	11.0345	32	2.9	48.5517	4.4	-0.730207	0.481809	-2.41848	0.0890566	0.674851	0.0817741	0.0551853
41.1429	11.4286	58	5.075	75.1429	6.575	-3.16514	0.0422081	-4.91371	0.00734516	0.959501	0.0072916	0.0069963
41.1429	11.4286	33	2.8875	50.1429	4.3875	-0.615143	0.540564	-2.36371	0.0940702	0.649113	0.0859818	0.0558119
41.1429	11.4286	49	4.2875	66.1429	5.7875	-2.24714	0.105701	-3.99571	0.0183943	0.904404	0.0180621	0.0163354
41.1429	11.4286	50	4.375	67.1429	5.875	-2.34914	0.0954509	-4.09771	0.0166106	0.912866	0.0163392	0.0149155
41.1429	11.4286	60	5.25	77.1429	6.75	-3.36914	0.0344191	-5.11771	0.0059897	0.966726	0.00595404	0.00575592
41.1429	11.4286	63	5.5125	80.1429	7.0125	-3.67514	0.0253458	-5.42371	0.00441073	0.975281	0.00439136	0.00428281
41.1429	11.4286	65	5.6875	82.1429	7.1875	-3.87914	0.0206685	-5.62771	0.00359679	0.97975	0.0035839	0.00351132
41.7391	11.5942	80	6.9	97.3913	8.4	-5.31791	0.00490298	-7.09183	0.000831877	0.995121	0.000831185	0.00082713
42.6667	11.8519	3	0.253125	20.7778	1.75313	2.678	14.556	0.864667	2.37421	0.0642841	0.703635	0.0452325
42.6667	11.8519	47	3.96563	64.7778	5.46563	-1.81	0.163654	-3.62333	0.0266935	0.859362	0.0259995	0.022343
42.6667	11.8519	54	4.55625	71.7778	6.05625	-2.524	0.0801384	-4.33733	0.0130713	0.925807	0.0129027	0.0119454
42.6667	11.8519	80	6.75	97.7778	8.25	-5.176	0.00565056	-6.98933	0.000921661	0.994381	0.000920812	0.000915638
44.3077	12.3077	18	1.4625	36.4615	2.9625	1.39908	4.05146	-0.484	0.616313	0.197963	0.381308	0.0754847
44.3077	12.3077	22	1.7875	40.4615	3.2875	0.991077	2.69413	-0.892	0.409835	0.270699	0.290697	0.0786916
44.3077	12.3077	48	3.9	66.4615	5.4	-1.66092	0.189964	-3.544	0.0288975	0.840362	0.0280859	0.0236023
44.3077	12.3077	83	6.74375	101.462	8.24375	-5.23092	0.00534859	-7.114	0.000813634	0.99468	0.000812972	0.000808647
44.3077	12.3077	86	6.9875	104.462	8.4875	-5.53692	0.00393863	-7.42	0.000599149	0.996077	0.00059879	0.000596441
44.6512	12.4031	90	7.25625	108.605	8.75625	-5.89237	0.00276042	-7.79005	0.000413834	0.997247	0.000413662	0.000412524
46.08	12.8	1	0.078125	20.2	1.57812	3.40424	30.0914	1.44584	4.24542	0.0321632	0.809357	0.0260315
46.08	12.8	8	0.625	27.2	2.125	2.69024	14.7352	0.73184	2.0789	0.0635517	0.675209	0.0429107
46.08	12.8	15	1.17188	34.2	2.67188	1.97624	7.21556	0.01784	1.018	0.12172	0.50446	0.061403
46.08	12.8	33	2.57812	52.2	4.07812	0.14024	1.15055	-1.81816	0.162324	0.464997	0.139655	0.0649391
46.08	12.8	45	3.51562	64.2	5.01562	-1.08376	0.338321	-3.04216	0.0477317	0.747205	0.0455572	0.0340405
46.08	12.8	49	3.82812	68.2	5.32812	-1.49176	0.224976	-3.45016	0.0317406	0.816342	0.0307641	0.025114
46.08	12.8	78	6.09375	97.2	7.59375	-4.44976	0.0116814	-6.40816	0.00164805	0.988454	0.00164534	0.00162634
46.08	12.8	80	6.25	99.2	7.75	-4.65376	0.00952572	-6.61216	0.00134393	0.990564	0.00134212	0.00132946
46.08	12.8	90	7.03125	109.2	8.53125	-5.67376	0.00343493	-7.63216	0.000484613	0.996577	0.000484378	0.00048272
46.08	12.8	90	7.03125	109.2	8.53125	-5.67376	0.00343493	-7.63216	0.000484613	0.996577	0.000484378	0.00048272
47.6033	13.2231	82	6.20125	101.835	7.70125	-4.62469	0.00980665	-6.64783	0.00129683	0.990289	0.00129515	0.00128257
48	13.3333	66	4.95	86	6.45	-2.932	0.0532904	-4.972	0.00692928	0.949406	0.00688159	0.00653342
48	13.3333	3	0.225	23	1.725	3.494	32.9174	1.454	4.2802	0.0294834	0.810613	0.0238997
48	13.3333	16	1.2	36	2.7	2.168	8.74078	0.128	1.13655	0.102661	0.531956	0.0546112
48	13.3333	46	3.45	66	4.95	-0.892	0.409835	-2.932	0.0532904	0.709303	0.0505942	0.0358866
48	13.3333	49	3.675	69	5.175	-1.198	0.301797	-3.238	0.0392423	0.768169	0.0377605	0.0290064
48	13.3333	65	4.875	85	6.375	-2.83	0.0590129	-4.87	0.00767337	0.944276	0.00761493	0.0071906
48	13.3333	66	4.95	86	6.45	-2.932	0.0532904	-4.972	0.00692928	0.949406	0.00688159	0.00653342
48	13.3333	84	6.3	104	7.8	-4.768	0.00849736	-6.808	0.0011049	0.991574	0.00110368	0.00109438
50.087	13.913	13	0.934375	33.8696	2.43438	2.7933	16.3349	0.664609	1.94373	0.0576871	0.660295	0.0380905
50.087	13.913	3	0.215625	23.8696	1.71562	3.8133	45.2999	1.68461	5.39034	0.0215983	0.843514	0.0182185
50.087	13.913	4	0.2875	24.8696	1.7875	3.7113	40.9071	1.58261	4.86764	0.0238623	0.829574	0.0197955
50.087	13.913	12	0.8625	32.8696	2.3625	2.8953	18.089	0.766609	2.15245	0.0523862	0.682787	0.0357686
50.087	13.913	15	1.07812	35.8696	2.57812	2.5893	13.3205	0.460609	1.58504	0.06983	0.613159	0.0428168
50.087	13.913	47	3.37812	67.8696	4.87812	-0.674696	0.509311	-2.80339	0.0606042	0.662554	0.0571412	0.0378591
50.087	13.913	66	4.74375	86.8696	6.24375	-2.6127	0.0733366	-4.74139	0.0087265	0.931674	0.008651	0.00805992
52.3636	14.5455	2	0.1375	23.8182	1.6375	4.26364	71.0679	2.03818	7.67664	0.0138758	0.884748	0.0122766
52.3636	14.5455	6	0.4125	27.8182	1.9125	3.85564	47.2587	1.63018	5.1048	0.0207217	0.836195	0.0173273
52.3636	14.5455	6	0.4125	27.8182	1.9125	3.85564	47.2587	1.63018	5.1048	0.0207217	0.836195	0.0173273
52.3636	14.5455	8	0.55	29.8182	2.05	3.65164	38.5377	1.42618	4.16277	0.0252923	0.806306	0.0203934
52.3636	14.5455	10	0.6875	31.8182	2.1875	3.44764	31.426	1.22218	3.39459	0.0308394	0.772447	0.0238218
52.3636	14.5455	10	0.6875	31.8182	2.1875	3.44764	31.426	1.22218	3.39459	0.0308394	0.772447	0.0238218
52.3636	14.5455	10	0.6875	31.8182	2.1875	3.44764	31.426	1.22218	3.39459	0.0308394	0.772447	0.0238218
52.3636	14.5455	15	1.03125	36.8182	2.53125	2.93764	18.8712	0.712182	2.03843	0.0503241	0.670883	0.0337616
52.3636	14.5455	80	5.5	101.818	7	-3.69236	0.024913	-5.91782	0.00269107	0.975693	0.00268384	0.00261861
52.3636	14.5455	87	5.98125	108.818	7.48125	-4.40636	0.0121995	-6.63182	0.00131776	0.987948	0.00131603	0.00130017
52.3636	14.5455	76	5.225	97.8182	6.725	-3.28436	0.0374644	-5.50982	0.00404684	0.963888	0.00403053	0.00388498
52.3636	14.5455	8	0.55	29.8182	2.05	3.65164	38.5377	1.42618	4.16277	0.0252923	0.806306	0.0203934
52.3636	14.5455	14	0.9625	35.8182	2.4625	3.03964	20.8976	0.814182	2.25733	0.045667	0.693	0.0316472
52.3636	14.5455	16	1.1	37.8182	2.6	2.83564	17.0412	0.610182	1.84077	0.0554286	0.647982	0.0359167
52.3636	14.5455	50	3.4375	71.8182	4.9375	-0.632364	0.531334	-2.85782	0.0573938	0.653025	0.0542786	0.0354453
53.3333	14.8148	2	0.135	24.2222	1.635	4.412	82.4342	2.14533	8.54489	0.0119855	0.895232	0.0107298
53.8318	14.9533	87	5.81813	109.43	7.31813	-4.18174	0.0152719	-6.46959	0.00154986	0.984958	0.00154746	0.00152419
54.8571	15.2381	15	0.984375	37.8571	2.48438	3.31914	27.6367	0.987714	2.68509	0.0349203	0.728636	0.0254442
54.8571	15.2381	14	0.91875	36.8571	2.41875	3.42114	30.6044	1.08971	2.97342	0.0316412	0.748328	0.023678
54.8571	15.2381	15	0.984375	37.8571	2.48438	3.31914	27.6367	0.987714	2.68509	0.0349203	0.728636	0.0254442
54.8571	15.2381	63	4.13438	85.8571	5.63438	-1.57686	0.206623	-3.90829	0.0200749	0.828759	0.0196798	0.0163098
54.8571	15.2381	80	5.25	102.857	6.75	-3.31086	0.0364849	-5.64229	0.00354476	0.964799	0.00353224	0.0034079
54.8571	15.2381	86	5.64375	108.857	7.14375	-3.92286	0.0197845	-6.25429	0.0019222	0.980599	0.00191851	0.00188129
54.8571	15.2381	49	3.21563	71.8571	4.71563	-0.148857	0.861692	-2.48029	0.0837193	0.537146	0.0772518	0.0414955
54.8571	15.2381	70	4.59375	92.8571	6.09375	-2.29086	0.10118	-4.62229	0.0098303	0.908117	0.00973461	0.00884016
54.8571	15.2381	82	5.38125	104.857	6.88125	-3.51486	0.0297521	-5.84629	0.00289062	0.971108	0.00288228	0.00279901
54.8571	15.2381	60	3.9375	82.8571	5.4375	-1.27086	0.280591	-3.60229	0.0272613	0.780889	0.0265379	0.0207232
54.8571	15.2381	67	4.39687	89.8571	5.89687	-1.98486	0.1374	-4.31629	0.0133494	0.879198	0.0131735	0.0115821
54.8571	15.2381	2	0.13125	24.8571	1.63125	4.64514	104.078	2.31371	10.1119	0.00951672	0.910006	0.00866028
54.8571	15.2381	3	0.196875	25.8571	1.69687	4.54314	93.9857	2.21171	9.13136	0.0105279	0.901297	0.00948876
54.8571	15.2381	4	0.2625	26.8571	1.7625	4.44114	84.8719	2.10971	8.24588	0.0116453	0.891844	0.0103857
54.8571	15.2381	8	0.525	30.8571	2.025	4.03314	56.438	1.70171	5.48334	0.0174101	0.845758	0.0147247
54.8571	15.2381	15	0.984375	37.8571	2.48437	3.31914	27.6367	0.987714	2.68509	0.0349203	0.728636	0.0254442
54.8571	15.2381	50	3.28125	72.8571	4.78125	-0.250857	0.778134	-2.58229	0.075601	0.562387	0.0702872	0.0395287
54.8571	15.2381	61	4.00312	83.8571	5.50312	-1.37286	0.253382	-3.70429	0.0246178	0.797841	0.0240263	0.0191692
54.8571	15.2381	83	5.44687	105.857	6.94687	-3.61686	0.026867	-5.94829	0.00261031	0.973836	0.00260352	0.0025354
56.4706	15.6863	10	0.6375	33.5294	2.1375	4.076	58.9094	1.676	5.34414	0.0166919	0.842374	0.0140608
57.6	16	1	0.0625	25	1.5625	5.1668	175.353	2.7188	15.1621	0.00567045	0.938127	0.0053196
57.6	16	2	0.125	26	1.625	5.0648	158.349	2.6168	13.6918	0.00627554	0.931935	0.0058484
57.6	16	3	0.1875	27	1.6875	4.9628	142.994	2.5148	12.3641	0.00694475	0.925173	0.0064251
57.6	16	4	0.25	28	1.75	4.8608	129.127	2.4128	11.1652	0.00768477	0.917798	0.00705307
57.6	16	4	0.25	28	1.75	4.8608	129.127	2.4128	11.1652	0.00768477	0.917798	0.00705307
57.6	16	6	0.375	30	1.875	4.6568	105.299	2.2088	9.10478	0.00940746	0.901037	0.00847647
57.6	16	10	0.625	34	2.125	4.2488	70.0213	1.8008	6.05449	0.0140803	0.858246	0.0120843
57.6	16	10	0.625	34	2.125	4.2488	70.0213	1.8008	6.05449	0.0140803	0.858246	0.0120843
57.6	16	15	0.9375	39	2.4375	3.7388	42.0475	1.2908	3.63569	0.0232302	0.784283	0.018219
57.6	16	15	0.9375	39	2.4375	3.7388	42.0475	1.2908	3.63569	0.0232302	0.784283	0.018219
57.6	16	16	1	40	2.5	3.6368	37.9701	1.1888	3.28314	0.0256607	0.766526	0.0196696
57.6	16	17	1.0625	41	2.5625	3.5348	34.2882	1.0868	2.96477	0.0283381	0.747779	0.0211906
57.6	16	17	1.0625	41	2.5625	3.5348	34.2882	1.0868	2.96477	0.0283381	0.747779	0.0211906
57.6	16	17	1.0625	41	2.5625	3.5348	34.2882	1.0868	2.96477	0.0283381	0.747779	0.0211906
57.6	16	18	1.125	42	2.625	3.4328	30.9632	0.9848	2.67728	0.031286	0.72806	0.022778
57.6	16	22	1.375	46	2.875	3.0248	20.5899	0.5768	1.78033	0.046318	0.640331	0.0296588
57.6	16	31	1.9375	55	3.4375	2.1068	8.22189	-0.3412	0.710917	0.108438	0.415518	0.0450578
57.6	16	50	3.125	74	4.625	0.1688	1.18388	-2.2792	0.102366	0.4579	0.0928603	0.0425207
57.6	16	50	3.125	74	4.625	0.1688	1.18388	-2.2792	0.102366	0.4579	0.0928603	0.0425207
57.6	16	50	3.125	74	4.625	0.1688	1.18388	-2.2792	0.102366	0.4579	0.0928603	0.0425207
57.6	16	62	3.875	86	5.375	-1.0552	0.348123	-3.5032	0.0301009	0.741772	0.0292213	0.0216756
57.6	16	63	3.9375	87	5.4375	-1.1572	0.314365	-3.6052	0.027182	0.760824	0.0264627	0.0201334
57.6	16	65	4.0625	89	5.5625	-1.3612	0.256353	-3.8092	0.0221659	0.795955	0.0216852	0.0172605
57.6	16	66	4.125	90	5.625	-1.4632	0.231494	-3.9112	0.0200165	0.812022	0.0196237	0.0159348
57.6	16	72	4.5	96	6	-2.0752	0.125531	-4.5232	0.0108542	0.888469	0.0107377	0.0095401
57.6	16	77	4.8125	101	6.3125	-2.5852	0.075381	-5.0332	0.00651792	0.929903	0.00647571	0.00602178
57.6	16	78	4.875	102	6.375	-2.6872	0.0680713	-5.1352	0.00588587	0.936267	0.00585143	0.0054785
57.6	16	30	1.875	54	3.375	2.2088	9.10478	-0.2392	0.787257	0.098963	0.440484	0.0435916
57.6	16	51	3.1875	75	4.6875	0.0668	1.06908	-2.3812	0.0924396	0.483306	0.0846176	0.0408962
58.7755	16.3265	75	4.59375	99.4898	6.09375	-2.20135	0.110654	-4.69931	0.00910159	0.90037	0.0090195	0.00812089
59.3814	16.4948	45	2.72813	69.7423	4.22813	0.951361	2.58923	-1.57235	0.207557	0.278611	0.171882	0.0478881
60	16.6667	80	4.8	105	6.3	-2.524	0.0801384	-5.074	0.00625734	0.925807	0.00621843	0.00575707
60.6316	16.8421	15	0.890625	40.2632	2.39063	4.20263	66.8621	1.62579	5.08243	0.0147358	0.835592	0.0123131
60.6316	16.8421	20	1.1875	45.2632	2.6875	3.69263	40.1504	1.11579	3.05198	0.0243011	0.753207	0.0183038
60.6316	16.8421	49	2.90938	74.2632	4.40938	0.734632	2.08471	-1.84221	0.158467	0.324179	0.13679	0.0443445
60.6316	16.8421	46	2.73125	71.2632	4.23125	1.04063	2.831	-1.53621	0.215195	0.261028	0.177087	0.0462246
60.6316	16.8421	17	1.00938	42.2632	2.50938	3.99863	54.5235	1.42179	4.14453	0.0180104	0.805619	0.0145095
60.6316	16.8421	20	1.1875	45.2632	2.6875	3.69263	40.1504	1.11579	3.05198	0.0243011	0.753207	0.0183038
60.6316	16.8421	49	2.90938	74.2632	4.40938	0.734632	2.08471	-1.84221	0.158467	0.324179	0.13679	0.0443445
60.6316	16.8421	49	2.90938	74.2632	4.40938	0.734632	2.08471	-1.84221	0.158467	0.324179	0.13679	0.0443445
60.6316	16.8421	20	1.1875	45.2632	2.6875	3.69263	40.1504	1.11579	3.05198	0.0243011	0.753207	0.0183038
60.6316	16.8421	20	1.1875	45.2632	2.6875	3.69263	40.1504	1.11579	3.05198	0.0243011	0.753207	0.0183038
60.6316	16.8421	23	1.36562	48.2632	2.86562	3.38663	29.5662	0.809789	2.24743	0.0327159	0.692065	0.0226415
60.6316	16.8421	48	2.85	73.2632	4.35	0.836632	2.30858	-1.74021	0.175483	0.302245	0.149286	0.045121
60.6316	16.8421	82	4.86875	107.263	6.36875	-2.63137	0.0719799	-5.20821	0.00547146	0.932853	0.00544168	0.00507629
60.6316	16.8421	88	5.225	113.263	6.725	-3.24337	0.0390322	-5.82021	0.00296698	0.962434	0.0029582	0.00284708
60.6316	16.8421	5	0.296875	30.2632	1.79687	5.22263	185.421	2.64579	14.0946	0.00536419	0.933751	0.00500882
60.6316	16.8421	15	0.890625	40.2632	2.39062	4.20263	66.8621	1.62579	5.08243	0.0147358	0.835592	0.0123131
60.6316	16.8421	32	1.9	57.2632	3.4	2.46863	11.8063	-0.108211	0.897439	0.0780867	0.472974	0.036933
60.6316	16.8421	33	1.95937	58.2632	3.45937	2.36663	10.6614	-0.210211	0.810414	0.0857529	0.44764	0.0383864
60.6316	16.8421	49	2.90937	74.2632	4.40937	0.734632	2.08471	-1.84221	0.158467	0.324179	0.13679	0.0443445
62.6087	17.3913	49	2.8175	75.087	4.3175	1.03713	2.82111	-1.62374	0.19716	0.261704	0.16469	0.0431
64	17.7778	77	4.33125	103.667	5.83125	-1.606	0.200689	-4.326	0.0132203	0.832855	0.0130478	0.010867
64	17.7778	18	1.0125	44.6667	2.5125	4.412	82.4342	1.692	5.43033	0.0119855	0.844487	0.0101216
64	17.7778	35	1.96875	61.6667	3.46875	2.678	14.556	-0.042	0.95887	0.0642841	0.489502	0.0314672
64	17.7778	22	1.2375	48.6667	2.7375	4.004	54.817	1.284	3.61106	0.0179157	0.78313	0.0140303
64	17.7778	85	4.78125	111.667	6.28125	-2.422	0.088744	-5.142	0.00584599	0.91849	0.00581201	0.00533827
64	17.7778	17	0.95625	43.6667	2.45625	4.514	91.2862	1.794	6.01346	0.0108359	0.857417	0.00929084
64	17.7778	24	1.35	50.6667	2.85	3.8	44.7012	1.08	2.94468	0.0218813	0.746494	0.0163342
64	17.7778	32	1.8	58.6667	3.3	2.984	19.7667	0.264	1.30213	0.048154	0.565619	0.0272368
64	17.7778	33	1.85625	59.6667	3.35625	2.882	17.8499	0.162	1.17586	0.0530506	0.540412	0.0286691
64	17.7778	36	2.025	62.6667	3.525	2.576	13.1445	-0.144	0.865888	0.0706991	0.464062	0.0328088
64	17.7778	38	2.1375	64.6667	3.6375	2.372	10.7188	-0.348	0.706099	0.0853329	0.413867	0.0353165
64	17.7778	47	2.64375	73.6667	4.14375	1.454	4.2802	-1.266	0.281957	0.189387	0.219943	0.0416542
64	17.7778	49	2.75625	75.6667	4.25625	1.25	3.49034	-1.47	0.229925	0.2227	0.186943	0.0416321
65.4545	18.1818	81	4.455	108.273	5.955	-1.79145	0.166717	-4.57327	0.0103241	0.857106	0.0102186	0.00875843
67.7647	18.8235	17	0.903125	45.2353	2.40313	5.09	162.39	2.21	9.11572	0.00612033	0.901144	0.0055153
67.7647	18.8235	18	0.95625	46.2353	2.45625	4.988	146.643	2.108	8.23176	0.0067731	0.891678	0.00603943
67.7647	18.8235	20	1.0625	48.2353	2.5625	4.784	119.582	1.904	6.71269	0.00829313	0.870344	0.00721787
67.7647	18.8235	33	1.75313	61.2353	3.25313	3.458	31.7534	0.578	1.78247	0.0305312	0.640607	0.0195585
67.7647	18.8235	45	2.39063	73.2353	3.89063	2.234	9.33714	-0.646	0.524138	0.0967386	0.343891	0.0332676
67.7647	18.8235	66	3.50625	94.2353	5.00625	0.092	1.09636	-2.788	0.0615442	0.477016	0.0579761	0.0276555
67.7647	18.8235	18	0.95625	46.2353	2.45625	4.988	146.643	2.108	8.23176	0.0067731	0.891678	0.00603943
71.1111	19.7531	79	3.99938	108.63	5.49938	-0.722	0.48578	-3.74422	0.023654	0.673047	0.0231074	0.0155524
76.8	21.3333	16	0.75	48	2.25	6.5744	716.516	3.3104	27.3961	0.0013937	0.964784	0.00134462
82.2857	22.8571	56	2.45	90.2857	3.95	3.33371	28.0423	-0.163429	0.849227	0.0344325	0.459234	0.0158126
headway=2.5
黄灯启亮时的速度_decision speed（km/h）	decision speed(m/s)	黄灯启亮时的距离_leading(m)	Estimated time to stop line_leading(s)	黄灯启亮时的距离_following	Estimated Time to Stop Line_following	logit（p）_leading	EXP_leading	logit（p）_following	EXP_following	P(stop)_leading	P(cross)_following	Probablity(rear-end)
19.2	5.33333	8	1.5	21.3333	4	-1.4224	0.241135	-2.7824	0.0618898	0.805714	0.0582827	0.0469592
19.2	5.33333	15	2.8125	28.3333	5.3125	-2.1364	0.118079	-3.4964	0.0303063	0.894391	0.0294148	0.0263084
20.5714	5.71429	45	7.875	59.2857	10.375	-4.98657	0.00682904	-6.44371	0.00159049	0.993217	0.00158796	0.00157719
22.5882	6.27451	66	10.5187	81.6863	13.0187	-6.82	0.00109172	-8.42	0.000220415	0.998909	0.000220366	0.000220126
27.4286	7.61905	81	10.6313	100.048	13.1313	-7.60943	0.000495755	-9.55229	7.10387e-05	0.999504	7.10337e-05	7.09985e-05
28.0976	7.80488	51	6.53438	70.5122	9.03438	-4.44707	0.0117128	-6.43732	0.0016007	0.988423	0.00159814	0.00157964
28.0976	7.80488	49	6.27812	68.5122	8.77812	-4.24307	0.0143634	-6.23332	0.00196293	0.98584	0.00195908	0.00193134
29.5385	8.20513	66	8.04375	86.5128	10.5438	-5.75662	0.00316179	-7.84892	0.000390172	0.996848	0.00039002	0.00038879
32	8.88889	80	9	102.222	11.5	-6.808	0.0011049	-9.07467	0.000114531	0.998896	0.000114518	0.000114391
32.9143	9.14286	60	6.5625	82.8571	9.0625	-4.62811	0.00977317	-6.95954	0.000949531	0.990321	0.00094863	0.000939448
33.8824	9.41176	35	3.71875	58.5294	6.21875	-1.93	0.145148	-4.33	0.0131675	0.873249	0.0129964	0.0113491
33.8824	9.41176	66	7.0125	89.5294	9.5125	-5.092	0.00614572	-7.492	0.000557527	0.993892	0.000557216	0.000553813
34.491	9.58084	90	9.39375	113.952	11.8938	-7.44687	0.000583262	-9.88999	5.06796e-05	0.999417	5.0677e-05	5.06474e-05
34.9091	9.69697	80	8.25	104.242	10.75	-6.36291	0.00172434	-8.83564	0.000145456	0.998279	0.000145435	0.000145185
34.9091	9.69697	90	9.28125	114.242	11.7812	-7.38291	0.000621789	-9.85564	5.24507e-05	0.999379	5.2448e-05	5.24154e-05
36	10	49	4.9	74	7.4	-3.034	0.0481228	-5.584	0.00375751	0.954087	0.00374344	0.00357157
36	10	40	4	65	6.5	-2.116	0.120513	-4.666	0.00940983	0.892449	0.00932211	0.00831951
36.4557	10.1266	50	4.9375	75.3165	7.4375	-3.06628	0.0465942	-5.64856	0.0035226	0.95548	0.00351023	0.00335396
37.1613	10.3226	74	7.16875	99.8065	9.66875	-5.40632	0.00448811	-8.03858	0.000322767	0.995532	0.000322663	0.000321221
37.1613	10.3226	82	7.94375	107.806	10.4438	-6.22232	0.00198463	-8.85458	0.000142726	0.998019	0.000142706	0.000142423
37.1613	10.3226	89	8.62187	114.806	11.1219	-6.93632	0.000971837	-9.56858	6.98905e-05	0.999029	6.98856e-05	6.98178e-05
37.1613	10.3226	60	5.8125	85.8065	8.3125	-3.97832	0.018717	-6.61058	0.00134605	0.981627	0.00134424	0.00131954
37.1613	10.3226	85	8.23437	110.806	10.7344	-6.52832	0.00146146	-9.16058	0.000105102	0.998541	0.000105091	0.000104937
38.4	10.6667	68	6.375	94.6667	8.875	-4.6048	0.0100037	-7.3248	0.000658991	0.990095	0.000658557	0.000652035
38.4	10.6667	84	7.875	110.667	10.375	-6.2368	0.00195611	-8.9568	0.000128858	0.998048	0.000128841	0.00012859
39.7241	11.0345	90	8.15625	117.586	10.6563	-6.64621	0.00129894	-9.46	7.79066e-05	0.998703	7.79005e-05	7.77995e-05
39.7241	11.0345	24	2.175	51.5862	4.675	0.0857931	1.08958	-2.728	0.0653499	0.478565	0.0613412	0.0293558
39.7241	11.0345	60	5.4375	87.5862	7.9375	-3.58621	0.0277032	-6.4	0.00166156	0.973044	0.0016588	0.00161409
39.7241	11.0345	84	7.6125	111.586	10.1125	-6.03421	0.0023954	-8.848	0.000143669	0.99761	0.000143648	0.000143305
39.7241	11.0345	32	2.9	59.5862	5.4	-0.730207	0.481809	-3.544	0.0288975	0.674851	0.0280859	0.0189538
41.1429	11.4286	58	5.075	86.5714	7.575	-3.16514	0.0422081	-6.07943	0.00228948	0.959501	0.00228425	0.00219175
41.1429	11.4286	33	2.8875	61.5714	5.3875	-0.615143	0.540564	-3.52943	0.0293217	0.649113	0.0284864	0.0184909
41.1429	11.4286	49	4.2875	77.5714	6.7875	-2.24714	0.105701	-5.16143	0.0057335	0.904404	0.00570082	0.00515584
41.1429	11.4286	50	4.375	78.5714	6.875	-2.34914	0.0954509	-5.26343	0.00517752	0.912866	0.00515085	0.00470204
41.1429	11.4286	60	5.25	88.5714	7.75	-3.36914	0.0344191	-6.28343	0.00186699	0.966726	0.00186351	0.0018015
41.1429	11.4286	63	5.5125	91.5714	8.0125	-3.67514	0.0253458	-6.58943	0.00137483	0.975281	0.00137294	0.001339
41.1429	11.4286	65	5.6875	93.5714	8.1875	-3.87914	0.0206685	-6.79343	0.00112112	0.97975	0.00111986	0.00109719
41.7391	11.5942	80	6.9	108.986	9.4	-5.31791	0.00490298	-8.27443	0.000254952	0.995121	0.000254887	0.000253644
42.6667	11.8519	3	0.253125	32.6296	2.75313	2.678	14.556	-0.344222	0.708771	0.0642841	0.414784	0.026664
42.6667	11.8519	47	3.96563	76.6296	6.46563	-1.81	0.163654	-4.83222	0.00796879	0.859362	0.00790579	0.00679394
42.6667	11.8519	54	4.55625	83.6296	7.05625	-2.524	0.0801384	-5.54622	0.00390217	0.925807	0.003887	0.00359862
42.6667	11.8519	80	6.75	109.63	9.25	-5.176	0.00565056	-8.19822	0.000275142	0.994381	0.000275067	0.000273521
44.3077	12.3077	18	1.4625	48.7692	3.9625	1.39908	4.05146	-1.73938	0.175628	0.197963	0.149391	0.0295739
44.3077	12.3077	22	1.7875	52.7692	4.2875	0.991077	2.69413	-2.14738	0.116789	0.270699	0.104576	0.0283086
44.3077	12.3077	48	3.9	78.7692	6.4	-1.66092	0.189964	-4.79938	0.00823481	0.840362	0.00816755	0.0068637
44.3077	12.3077	83	6.74375	113.769	9.24375	-5.23092	0.00534859	-8.36938	0.000231858	0.99468	0.000231804	0.000230571
44.3077	12.3077	86	6.9875	116.769	9.4875	-5.53692	0.00393863	-8.67538	0.000170737	0.996077	0.000170708	0.000170038
44.6512	12.4031	90	7.25625	121.008	9.75625	-5.89237	0.00276042	-9.05516	0.000116787	0.997247	0.000116773	0.000116451
46.08	12.8	1	0.078125	33	2.57812	3.40424	30.0914	0.14024	1.15055	0.0321632	0.535003	0.0172074
46.08	12.8	8	0.625	40	3.125	2.69024	14.7352	-0.57376	0.563403	0.0635517	0.36037	0.0229021
46.08	12.8	15	1.17188	47	3.67188	1.97624	7.21556	-1.28776	0.275888	0.12172	0.216232	0.0263198
46.08	12.8	33	2.57812	65	5.07812	0.14024	1.15055	-3.12376	0.0439914	0.464997	0.0421377	0.0195939
46.08	12.8	45	3.51562	77	6.01562	-1.08376	0.338321	-4.34776	0.0129358	0.747205	0.0127706	0.00954222
46.08	12.8	49	3.82812	81	6.32812	-1.49176	0.224976	-4.75576	0.008602	0.816342	0.00852864	0.00696229
46.08	12.8	78	6.09375	110	8.59375	-4.44976	0.0116814	-7.71376	0.000446639	0.988454	0.00044644	0.000441285
46.08	12.8	80	6.25	112	8.75	-4.65376	0.00952572	-7.91776	0.000364217	0.990564	0.000364085	0.000360649
46.08	12.8	90	7.03125	122	9.53125	-5.67376	0.00343493	-8.93776	0.000131335	0.996577	0.000131318	0.000130868
46.08	12.8	90	7.03125	122	9.53125	-5.67376	0.00343493	-8.93776	0.000131335	0.996577	0.000131318	0.000130868
47.6033	13.2231	82	6.20125	115.058	8.70125	-4.62469	0.00980665	-7.9966	0.000336607	0.990289	0.000336494	0.000333226
48	13.3333	66	4.95	99.3333	7.45	-2.932	0.0532904	-6.332	0.00177847	0.949406	0.00177532	0.0016855
48	13.3333	3	0.225	36.3333	2.725	3.494	32.9174	0.094	1.09856	0.0294834	0.523483	0.0154341
48	13.3333	16	1.2	49.3333	3.7	2.168	8.74078	-1.232	0.291709	0.102661	0.225832	0.0231841
48	13.3333	46	3.45	79.3333	5.95	-0.892	0.409835	-4.292	0.0136775	0.709303	0.013493	0.00957062
48	13.3333	49	3.675	82.3333	6.175	-1.198	0.301797	-4.598	0.010072	0.768169	0.00997153	0.00765982
48	13.3333	65	4.875	98.3333	7.375	-2.83	0.0590129	-6.23	0.00196945	0.944276	0.00196558	0.00185605
48	13.3333	66	4.95	99.3333	7.45	-2.932	0.0532904	-6.332	0.00177847	0.949406	0.00177532	0.0016855
48	13.3333	84	6.3	117.333	8.8	-4.768	0.00849736	-8.168	0.000283585	0.991574	0.000283504	0.000281115
50.087	13.913	13	0.934375	47.7826	3.43438	2.7933	16.3349	-0.754522	0.470235	0.0576871	0.319837	0.0184505
50.087	13.913	3	0.215625	37.7826	2.71562	3.8133	45.2999	0.265478	1.30405	0.0215983	0.565982	0.0122243
50.087	13.913	4	0.2875	38.7826	2.7875	3.7113	40.9071	0.163478	1.1776	0.0238623	0.540779	0.0129042
50.087	13.913	12	0.8625	46.7826	3.3625	2.8953	18.089	-0.652522	0.520731	0.0523862	0.342421	0.0179382
50.087	13.913	15	1.07812	49.7826	3.57812	2.5893	13.3205	-0.958522	0.383459	0.06983	0.277174	0.0193551
50.087	13.913	47	3.37812	81.7826	5.87812	-0.674696	0.509311	-4.22252	0.0146616	0.662554	0.0144498	0.00957375
50.087	13.913	66	4.74375	100.783	7.24375	-2.6127	0.0733366	-6.16052	0.00211115	0.931674	0.0021067	0.00196276
52.3636	14.5455	2	0.1375	38.3636	2.6375	4.26364	71.0679	0.554545	1.74115	0.0138758	0.63519	0.00881376
52.3636	14.5455	6	0.4125	42.3636	2.9125	3.85564	47.2587	0.146545	1.15783	0.0207217	0.536571	0.0111186
52.3636	14.5455	6	0.4125	42.3636	2.9125	3.85564	47.2587	0.146545	1.15783	0.0207217	0.536571	0.0111186
52.3636	14.5455	8	0.55	44.3636	3.05	3.65164	38.5377	-0.0574545	0.944165	0.0252923	0.48564	0.012283
52.3636	14.5455	10	0.6875	46.3636	3.1875	3.44764	31.426	-0.261455	0.769931	0.0308394	0.435006	0.0134153
52.3636	14.5455	10	0.6875	46.3636	3.1875	3.44764	31.426	-0.261455	0.769931	0.0308394	0.435006	0.0134153
52.3636	14.5455	10	0.6875	46.3636	3.1875	3.44764	31.426	-0.261455	0.769931	0.0308394	0.435006	0.0134153
52.3636	14.5455	15	1.03125	51.3636	3.53125	2.93764	18.8712	-0.771455	0.46234	0.0503241	0.316165	0.0159107
52.3636	14.5455	80	5.5	116.364	8	-3.69236	0.024913	-7.40145	0.000610364	0.975693	0.000609992	0.000595165
52.3636	14.5455	87	5.98125	123.364	8.48125	-4.40636	0.0121995	-8.11545	0.000298884	0.987948	0.000298795	0.000295194
52.3636	14.5455	76	5.225	112.364	7.725	-3.28436	0.0374644	-6.99345	0.00091787	0.963888	0.000917029	0.000883913
52.3636	14.5455	8	0.55	44.3636	3.05	3.65164	38.5377	-0.0574545	0.944165	0.0252923	0.48564	0.012283
52.3636	14.5455	14	0.9625	50.3636	3.4625	3.03964	20.8976	-0.669455	0.511988	0.045667	0.338619	0.0154637
52.3636	14.5455	16	1.1	52.3636	3.6	2.83564	17.0412	-0.873455	0.417507	0.0554286	0.294536	0.0163257
52.3636	14.5455	50	3.4375	86.3636	5.9375	-0.632364	0.531334	-4.34145	0.0130176	0.653025	0.0128503	0.00839157
53.3333	14.8148	2	0.135	39.037	2.635	4.412	82.4342	0.634222	1.88556	0.0119855	0.653446	0.00783188
53.8318	14.9533	87	5.81813	124.383	8.31813	-4.18174	0.0152719	-7.99482	0.000337204	0.984958	0.00033709	0.00033202
54.8571	15.2381	15	0.984375	53.0952	3.48438	3.31914	27.6367	-0.566571	0.567468	0.0349203	0.362028	0.0126421
54.8571	15.2381	14	0.91875	52.0952	3.41875	3.42114	30.6044	-0.464571	0.628404	0.0316412	0.385902	0.0122104
54.8571	15.2381	15	0.984375	53.0952	3.48438	3.31914	27.6367	-0.566571	0.567468	0.0349203	0.362028	0.0126421
54.8571	15.2381	63	4.13438	101.095	6.63438	-1.57686	0.206623	-5.46257	0.00424263	0.828759	0.00422471	0.00350126
54.8571	15.2381	80	5.25	118.095	7.75	-3.31086	0.0364849	-7.19657	0.00074915	0.964799	0.000748589	0.000722238
54.8571	15.2381	86	5.64375	124.095	8.14375	-3.92286	0.0197845	-7.80857	0.000406238	0.980599	0.000406073	0.000398195
54.8571	15.2381	49	3.21563	87.0952	5.71563	-0.148857	0.861692	-4.03457	0.0176933	0.537146	0.0173857	0.00933863
54.8571	15.2381	70	4.59375	108.095	7.09375	-2.29086	0.10118	-6.17657	0.00207754	0.908117	0.00207323	0.00188274
54.8571	15.2381	82	5.38125	120.095	7.88125	-3.51486	0.0297521	-7.40057	0.000610904	0.971108	0.000610531	0.000592891
54.8571	15.2381	60	3.9375	98.0952	6.4375	-1.27086	0.280591	-5.15657	0.00576142	0.780889	0.00572842	0.00447326
54.8571	15.2381	67	4.39687	105.095	6.89687	-1.98486	0.1374	-5.87057	0.00282126	0.879198	0.00281332	0.00247347
54.8571	15.2381	2	0.13125	40.0952	2.63125	4.64514	104.078	0.759429	2.13705	0.00951672	0.68123	0.00648307
54.8571	15.2381	3	0.196875	41.0952	2.69687	4.54314	93.9857	0.657429	1.92982	0.0105279	0.658683	0.00693454
54.8571	15.2381	4	0.2625	42.0952	2.7625	4.44114	84.8719	0.555429	1.74269	0.0116453	0.635394	0.00739933
54.8571	15.2381	8	0.525	46.0952	3.025	4.03314	56.438	0.147429	1.15885	0.0174101	0.536791	0.00934556
54.8571	15.2381	15	0.984375	53.0952	3.48437	3.31914	27.6367	-0.566571	0.567468	0.0349203	0.362028	0.0126421
54.8571	15.2381	50	3.28125	88.0952	5.78125	-0.250857	0.778134	-4.13657	0.0159775	0.562387	0.0157263	0.00884426
54.8571	15.2381	61	4.00312	99.0952	6.50312	-1.37286	0.253382	-5.25857	0.00520273	0.797841	0.0051758	0.00412947
54.8571	15.2381	83	5.44687	121.095	7.94687	-3.61686	0.026867	-7.50257	0.000551664	0.973836	0.00055136	0.000536934
56.4706	15.6863	10	0.6375	49.2157	3.1375	4.076	58.9094	0.076	1.07896	0.0166919	0.518991	0.00866293
57.6	16	1	0.0625	41	2.5625	5.1668	175.353	1.0868	2.96477	0.00567045	0.747779	0.00424024
57.6	16	2	0.125	42	2.625	5.0648	158.349	0.9848	2.67728	0.00627554	0.72806	0.00456897
57.6	16	3	0.1875	43	2.6875	4.9628	142.994	0.8828	2.41766	0.00694475	0.707402	0.00491273
57.6	16	4	0.25	44	2.75	4.8608	129.127	0.7808	2.18322	0.00768477	0.685853	0.00527062
57.6	16	4	0.25	44	2.75	4.8608	129.127	0.7808	2.18322	0.00768477	0.685853	0.00527062
57.6	16	6	0.375	46	2.875	4.6568	105.299	0.5768	1.78033	0.00940746	0.640331	0.00602389
57.6	16	10	0.625	50	3.125	4.2488	70.0213	0.1688	1.18388	0.0140803	0.5421	0.00763292
57.6	16	10	0.625	50	3.125	4.2488	70.0213	0.1688	1.18388	0.0140803	0.5421	0.00763292
57.6	16	15	0.9375	55	3.4375	3.7388	42.0475	-0.3412	0.710917	0.0232302	0.415518	0.00965255
57.6	16	15	0.9375	55	3.4375	3.7388	42.0475	-0.3412	0.710917	0.0232302	0.415518	0.00965255
57.6	16	16	1	56	3.5	3.6368	37.9701	-0.4432	0.641979	0.0256607	0.390979	0.0100328
57.6	16	17	1.0625	57	3.5625	3.5348	34.2882	-0.5452	0.579726	0.0283381	0.366979	0.0103995
57.6	16	17	1.0625	57	3.5625	3.5348	34.2882	-0.5452	0.579726	0.0283381	0.366979	0.0103995
57.6	16	17	1.0625	57	3.5625	3.5348	34.2882	-0.5452	0.579726	0.0283381	0.366979	0.0103995
57.6	16	18	1.125	58	3.625	3.4328	30.9632	-0.6472	0.52351	0.031286	0.343621	0.0107505
57.6	16	22	1.375	62	3.875	3.0248	20.5899	-1.0552	0.348123	0.046318	0.258228	0.0119606
57.6	16	31	1.9375	71	4.4375	2.1068	8.22189	-1.9732	0.139011	0.108438	0.122046	0.0132343
57.6	16	50	3.125	90	5.625	0.1688	1.18388	-3.9112	0.0200165	0.4579	0.0196237	0.00898568
57.6	16	50	3.125	90	5.625	0.1688	1.18388	-3.9112	0.0200165	0.4579	0.0196237	0.00898568
57.6	16	50	3.125	90	5.625	0.1688	1.18388	-3.9112	0.0200165	0.4579	0.0196237	0.00898568
57.6	16	62	3.875	102	6.375	-1.0552	0.348123	-5.1352	0.00588587	0.741772	0.00585143	0.00434043
57.6	16	63	3.9375	103	6.4375	-1.1572	0.314365	-5.2372	0.00531512	0.760824	0.00528702	0.00402249
57.6	16	65	4.0625	105	6.5625	-1.3612	0.256353	-5.4412	0.00433428	0.795955	0.00431557	0.003435
57.6	16	66	4.125	106	6.625	-1.4632	0.231494	-5.5432	0.00391398	0.812022	0.00389872	0.00316585
57.6	16	72	4.5	112	7	-2.0752	0.125531	-6.1552	0.00212242	0.888469	0.00211792	0.00188171
57.6	16	77	4.8125	117	7.3125	-2.5852	0.075381	-6.6652	0.0012745	0.929903	0.00127288	0.00118365
57.6	16	78	4.875	118	7.375	-2.6872	0.0680713	-6.7672	0.00115091	0.936267	0.00114959	0.00107632
57.6	16	30	1.875	70	4.375	2.2088	9.10478	-1.8712	0.153939	0.098963	0.133403	0.013202
57.6	16	51	3.1875	91	5.6875	0.0668	1.06908	-4.0132	0.0180755	0.483306	0.0177545	0.00858088
58.7755	16.3265	75	4.59375	115.816	7.09375	-2.20135	0.110654	-6.36461	0.00172141	0.90037	0.00171845	0.00154724
59.3814	16.4948	45	2.72813	86.2371	5.22813	0.951361	2.58923	-3.25482	0.0385876	0.278611	0.0371539	0.0103515
60	16.6667	80	4.8	121.667	7.3	-2.524	0.0801384	-6.774	0.00114311	0.925807	0.00114181	0.00105709
60.6316	16.8421	15	0.890625	57.1053	3.39063	4.20263	66.8621	-0.0921053	0.912009	0.0147358	0.47699	0.00702882
60.6316	16.8421	20	1.1875	62.1053	3.6875	3.69263	40.1504	-0.602105	0.547657	0.0243011	0.353862	0.00859925
60.6316	16.8421	49	2.90938	91.1053	5.40938	0.734632	2.08471	-3.56011	0.0284358	0.324179	0.0276496	0.00896342
60.6316	16.8421	46	2.73125	88.1053	5.23125	1.04063	2.831	-3.25411	0.0386154	0.261028	0.0371797	0.00970494
60.6316	16.8421	17	1.00938	59.1053	3.50938	3.99863	54.5235	-0.296105	0.743709	0.0180104	0.42651	0.00768161
60.6316	16.8421	20	1.1875	62.1053	3.6875	3.69263	40.1504	-0.602105	0.547657	0.0243011	0.353862	0.00859925
60.6316	16.8421	49	2.90938	91.1053	5.40938	0.734632	2.08471	-3.56011	0.0284358	0.324179	0.0276496	0.00896342
60.6316	16.8421	49	2.90938	91.1053	5.40938	0.734632	2.08471	-3.56011	0.0284358	0.324179	0.0276496	0.00896342
60.6316	16.8421	20	1.1875	62.1053	3.6875	3.69263	40.1504	-0.602105	0.547657	0.0243011	0.353862	0.00859925
60.6316	16.8421	20	1.1875	62.1053	3.6875	3.69263	40.1504	-0.602105	0.547657	0.0243011	0.353862	0.00859925
60.6316	16.8421	23	1.36562	65.1053	3.86562	3.38663	29.5662	-0.908105	0.403288	0.0327159	0.287388	0.00940214
60.6316	16.8421	48	2.85	90.1053	5.35	0.836632	2.30858	-3.45811	0.0314894	0.302245	0.0305281	0.00922694
60.6316	16.8421	82	4.86875	124.105	7.36875	-2.63137	0.0719799	-6.92611	0.000981817	0.932853	0.000980854	0.000914993
60.6316	16.8421	88	5.225	130.105	7.725	-3.24337	0.0390322	-7.53811	0.000532405	0.962434	0.000532122	0.000512132
60.6316	16.8421	5	0.296875	47.1053	2.79687	5.22263	185.421	0.927895	2.52918	0.00536419	0.716648	0.00384423
60.6316	16.8421	15	0.890625	57.1053	3.39062	4.20263	66.8621	-0.0921053	0.912009	0.0147358	0.47699	0.00702882
60.6316	16.8421	32	1.9	74.1053	4.4	2.46863	11.8063	-1.82611	0.16104	0.0780867	0.138703	0.0108309
60.6316	16.8421	33	1.95937	75.1053	4.45937	2.36663	10.6614	-1.92811	0.145423	0.0857529	0.12696	0.0108872
60.6316	16.8421	49	2.90937	91.1053	5.40937	0.734632	2.08471	-3.56011	0.0284358	0.324179	0.0276496	0.00896342
62.6087	17.3913	49	2.8175	92.4783	5.3175	1.03713	2.82111	-3.39765	0.0334517	0.261704	0.0323689	0.00847108
64	17.7778	77	4.33125	121.444	6.83125	-1.606	0.200689	-6.13933	0.00215636	0.832855	0.00215172	0.00179207
64	17.7778	18	1.0125	62.4444	3.5125	4.412	82.4342	-0.121333	0.885739	0.0119855	0.469704	0.00562963
64	17.7778	35	1.96875	79.4444	4.46875	2.678	14.556	-1.85533	0.156401	0.0642841	0.135248	0.00869429
64	17.7778	22	1.2375	66.4444	3.7375	4.004	54.817	-0.529333	0.588998	0.0179157	0.370672	0.00664085
64	17.7778	85	4.78125	129.444	7.28125	-2.422	0.088744	-6.95533	0.000953536	0.91849	0.000952628	0.000874979
64	17.7778	17	0.95625	61.4444	3.45625	4.514	91.2862	-0.0193333	0.980852	0.0108359	0.495167	0.00536555
64	17.7778	24	1.35	68.4444	3.85	3.8	44.7012	-0.733333	0.480305	0.0218813	0.324464	0.00709968
64	17.7778	32	1.8	76.4444	4.3	2.984	19.7667	-1.54933	0.21239	0.048154	0.175183	0.00843573
64	17.7778	33	1.85625	77.4444	4.35625	2.882	17.8499	-1.65133	0.191794	0.0530506	0.160929	0.00853737
64	17.7778	36	2.025	80.4444	4.525	2.576	13.1445	-1.95733	0.141235	0.0706991	0.123756	0.00874943
64	17.7778	38	2.1375	82.4444	4.6375	2.372	10.7188	-2.16133	0.115171	0.0853329	0.103277	0.00881292
64	17.7778	47	2.64375	91.4444	5.14375	1.454	4.2802	-3.07933	0.0459899	0.189387	0.0439678	0.00832692
64	17.7778	49	2.75625	93.4444	5.25625	1.25	3.49034	-3.28333	0.037503	0.2227	0.0361474	0.00805003
65.4545	18.1818	81	4.455	126.455	6.955	-1.79145	0.166717	-6.42782	0.00161597	0.857106	0.00161337	0.00138282
67.7647	18.8235	17	0.903125	64.0588	3.40313	5.09	162.39	0.29	1.33643	0.00612033	0.571996	0.00350081
67.7647	18.8235	18	0.95625	65.0588	3.45625	4.988	146.643	0.188	1.20683	0.0067731	0.546862	0.00370395
67.7647	18.8235	20	1.0625	67.0588	3.5625	4.784	119.582	-0.016	0.984127	0.00829313	0.496	0.00411339
67.7647	18.8235	33	1.75313	80.0588	4.25313	3.458	31.7534	-1.342	0.261323	0.0305312	0.207181	0.00632549
67.7647	18.8235	45	2.39063	92.0588	4.89063	2.234	9.33714	-2.566	0.0768423	0.0967386	0.0713589	0.00690316
67.7647	18.8235	66	3.50625	113.059	6.00625	0.092	1.09636	-4.708	0.00902281	0.477016	0.00894212	0.00426554
67.7647	18.8235	18	0.95625	65.0588	3.45625	4.988	146.643	0.188	1.20683	0.0067731	0.546862	0.00370395
71.1111	19.7531	79	3.99938	128.383	6.49938	-0.722	0.48578	-5.75904	0.00315415	0.673047	0.00314423	0.00211622
76.8	21.3333	16	0.75	69.3333	3.25	6.5744	716.516	1.1344	3.10931	0.0013937	0.75665	0.00105454
82.2857	22.8571	56	2.45	113.143	4.95	3.33371	28.0423	-2.49486	0.0825082	0.0344325	0.0762195	0.00262443
headway=3.0
黄灯启亮时的速度_decision speed（km/h）	decision speed(m/s)	黄灯启亮时的距离_leading(m)	Estimated time to stop line_leading(s)	黄灯启亮时的距离_following	Estimated Time to Stop Line_following	logit（p）_leading	EXP_leading	logit（p）_following	EXP_following	P(stop)_leading	P(cross)_following	Probablity(rear-end)
19.2	5.33333	8	1.5	24	4.5	-1.4224	0.241135	-3.0544	0.047151	0.805714	0.0450279	0.0362796
19.2	5.33333	15	2.8125	31	5.8125	-2.1364	0.118079	-3.7684	0.023089	0.894391	0.0225679	0.0201845
20.5714	5.71429	45	7.875	62.1429	10.875	-4.98657	0.00682904	-6.73514	0.00118841	0.993217	0.00118699	0.00117894
22.5882	6.27451	66	10.5187	84.8235	13.5187	-6.82	0.00109172	-8.74	0.000160054	0.998909	0.000160028	0.000159854
27.4286	7.61905	81	10.6313	103.857	13.6313	-7.60943	0.000495755	-9.94086	4.8166e-05	0.999504	4.81637e-05	4.81398e-05
28.0976	7.80488	51	6.53438	74.4146	9.53438	-4.44707	0.0117128	-6.83537	0.00107507	0.988423	0.00107392	0.00106149
28.0976	7.80488	49	6.27812	72.4146	9.27812	-4.24307	0.0143634	-6.63137	0.00131836	0.98584	0.00131663	0.00129798
29.5385	8.20513	66	8.04375	90.6154	11.0438	-5.75662	0.00316179	-8.26738	0.000256756	0.996848	0.00025669	0.000255881
32	8.88889	80	9	106.667	12	-6.808	0.0011049	-9.528	7.2785e-05	0.998896	7.27798e-05	7.26994e-05
32.9143	9.14286	60	6.5625	87.4286	9.5625	-4.62811	0.00977317	-7.42583	0.000595667	0.990321	0.000595313	0.000589551
33.8824	9.41176	35	3.71875	63.2353	6.71875	-1.93	0.145148	-4.81	0.00814786	0.873249	0.00808201	0.00705761
33.8824	9.41176	66	7.0125	94.2353	10.0125	-5.092	0.00614572	-7.972	0.000344988	0.993892	0.000344869	0.000342763
34.491	9.58084	90	9.39375	118.743	12.3938	-7.44687	0.000583262	-10.3786	3.10904e-05	0.999417	3.10895e-05	3.10713e-05
34.9091	9.69697	80	8.25	109.091	11.25	-6.36291	0.00172434	-9.33018	8.87061e-05	0.998279	8.86982e-05	8.85456e-05
34.9091	9.69697	90	9.28125	119.091	12.2812	-7.38291	0.000621789	-10.3502	3.1987e-05	0.999379	3.1986e-05	3.19661e-05
36	10	49	4.9	79	7.9	-3.034	0.0481228	-6.094	0.00225637	0.954087	0.00225129	0.00214792
36	10	40	4	70	7	-2.116	0.120513	-5.176	0.00565056	0.892449	0.00561881	0.0050145
36.4557	10.1266	50	4.9375	80.3797	7.9375	-3.06628	0.0465942	-6.16501	0.00210169	0.95548	0.00209728	0.00200391
37.1613	10.3226	74	7.16875	104.968	10.1688	-5.40632	0.00448811	-8.56503	0.000190657	0.995532	0.000190621	0.000189769
37.1613	10.3226	82	7.94375	112.968	10.9438	-6.22232	0.00198463	-9.38103	8.43081e-05	0.998019	8.4301e-05	8.4134e-05
37.1613	10.3226	89	8.62187	119.968	11.6219	-6.93632	0.000971837	-10.095	4.12841e-05	0.999029	4.12824e-05	4.12424e-05
37.1613	10.3226	60	5.8125	90.9677	8.8125	-3.97832	0.018717	-7.13703	0.000795108	0.981627	0.000794477	0.00077988
37.1613	10.3226	85	8.23437	115.968	11.2344	-6.52832	0.00146146	-9.68703	6.20834e-05	0.998541	6.20795e-05	6.19889e-05
38.4	10.6667	68	6.375	100	9.375	-4.6048	0.0100037	-7.8688	0.000382493	0.990095	0.000382347	0.00037856
38.4	10.6667	84	7.875	116	10.875	-6.2368	0.00195611	-9.5008	7.4792e-05	0.998048	7.47864e-05	7.46404e-05
39.7241	11.0345	90	8.15625	123.103	11.1563	-6.64621	0.00129894	-10.0228	4.43784e-05	0.998703	4.43764e-05	4.43188e-05
39.7241	11.0345	24	2.175	57.1034	5.175	0.0857931	1.08958	-3.29076	0.0372256	0.478565	0.0358896	0.0171755
39.7241	11.0345	60	5.4375	93.1034	8.4375	-3.58621	0.0277032	-6.96276	0.000946482	0.973044	0.000945587	0.000920097
39.7241	11.0345	84	7.6125	117.103	10.6125	-6.03421	0.0023954	-9.41076	8.18388e-05	0.99761	8.18321e-05	8.16366e-05
39.7241	11.0345	32	2.9	65.1034	5.9	-0.730207	0.481809	-4.10676	0.016461	0.674851	0.0161945	0.0109288
41.1429	11.4286	58	5.075	92.2857	8.075	-3.16514	0.0422081	-6.66229	0.00127822	0.959501	0.00127659	0.00122489
41.1429	11.4286	33	2.8875	67.2857	5.8875	-0.615143	0.540564	-4.11229	0.0163703	0.649113	0.0161066	0.010455
41.1429	11.4286	49	4.2875	83.2857	7.2875	-2.24714	0.105701	-5.74429	0.00320102	0.904404	0.00319081	0.00288578
41.1429	11.4286	50	4.375	84.2857	7.375	-2.34914	0.0954509	-5.84629	0.00289062	0.912866	0.00288228	0.00263114
41.1429	11.4286	60	5.25	94.2857	8.25	-3.36914	0.0344191	-6.86629	0.00104234	0.966726	0.00104126	0.00100661
41.1429	11.4286	63	5.5125	97.2857	8.5125	-3.67514	0.0253458	-7.17229	0.000767566	0.975281	0.000766978	0.000748018
41.1429	11.4286	65	5.6875	99.2857	8.6875	-3.87914	0.0206685	-7.37629	0.000625921	0.97975	0.00062553	0.000612863
41.7391	11.5942	80	6.9	114.783	9.9	-5.31791	0.00490298	-8.86574	0.000141143	0.995121	0.000141123	0.000140434
42.6667	11.8519	3	0.253125	38.5556	3.25313	2.678	14.556	-0.948667	0.387257	0.0642841	0.279153	0.0179451
42.6667	11.8519	47	3.96563	82.5556	6.96563	-1.81	0.163654	-5.43667	0.00435397	0.859362	0.0043351	0.00372542
42.6667	11.8519	54	4.55625	89.5556	7.55625	-2.524	0.0801384	-6.15067	0.00213206	0.925807	0.00212752	0.00196968
42.6667	11.8519	80	6.75	115.556	9.75	-5.176	0.00565056	-8.80267	0.000150332	0.994381	0.000150309	0.000149465
44.3077	12.3077	18	1.4625	54.9231	4.4625	1.39908	4.05146	-2.36708	0.0937544	0.197963	0.0857179	0.0169689
44.3077	12.3077	22	1.7875	58.9231	4.7875	0.991077	2.69413	-2.77508	0.0623447	0.270699	0.0586859	0.0158862
44.3077	12.3077	48	3.9	84.9231	6.9	-1.66092	0.189964	-5.42708	0.00439593	0.840362	0.00437669	0.003678
44.3077	12.3077	83	6.74375	119.923	9.74375	-5.23092	0.00534859	-8.99708	0.000123771	0.99468	0.000123756	0.000123097
44.3077	12.3077	86	6.9875	122.923	9.9875	-5.53692	0.00393863	-9.30308	9.11434e-05	0.996077	9.11351e-05	9.07775e-05
44.6512	12.4031	90	7.25625	127.209	10.2562	-5.89237	0.00276042	-9.68772	6.20406e-05	0.997247	6.20368e-05	6.1866e-05
46.08	12.8	1	0.078125	39.4	3.07812	3.40424	30.0914	-0.51256	0.59896	0.0321632	0.374594	0.0120481
46.08	12.8	8	0.625	46.4	3.625	2.69024	14.7352	-1.22656	0.2933	0.0635517	0.226784	0.0144125
46.08	12.8	15	1.17188	53.4	4.17188	1.97624	7.21556	-1.94056	0.143623	0.12172	0.125586	0.0152864
46.08	12.8	33	2.57812	71.4	5.57812	0.14024	1.15055	-3.77656	0.0229013	0.464997	0.0223886	0.0104106
46.08	12.8	45	3.51562	83.4	6.51562	-1.08376	0.338321	-5.00056	0.00673417	0.747205	0.00668913	0.00499815
46.08	12.8	49	3.82812	87.4	6.82812	-1.49176	0.224976	-5.40856	0.00447808	0.816342	0.00445812	0.00363935
46.08	12.8	78	6.09375	116.4	9.09375	-4.44976	0.0116814	-8.36656	0.000232514	0.988454	0.00023246	0.000229776
46.08	12.8	80	6.25	118.4	9.25	-4.65376	0.00952572	-8.57056	0.000189606	0.990564	0.00018957	0.000187782
46.08	12.8	90	7.03125	128.4	10.0312	-5.67376	0.00343493	-9.59056	6.83711e-05	0.996577	6.83664e-05	6.81324e-05
46.08	12.8	90	7.03125	128.4	10.0312	-5.67376	0.00343493	-9.59056	6.83711e-05	0.996577	6.83664e-05	6.81324e-05
47.6033	13.2231	82	6.20125	121.669	9.20125	-4.62469	0.00980665	-8.67098	0.000171492	0.990289	0.000171462	0.000169797
48	13.3333	66	4.95	106	7.95	-2.932	0.0532904	-7.012	0.000901005	0.949406	0.000900194	0.000854649
48	13.3333	3	0.225	43	3.225	3.494	32.9174	-0.586	0.556549	0.0294834	0.357553	0.0105419
48	13.3333	16	1.2	56	4.2	2.168	8.74078	-1.912	0.147785	0.102661	0.128756	0.0132183
48	13.3333	46	3.45	86	6.45	-0.892	0.409835	-4.972	0.00692928	0.709303	0.00688159	0.00488113
48	13.3333	49	3.675	89	6.675	-1.198	0.301797	-5.278	0.00510263	0.768169	0.00507672	0.00389978
48	13.3333	65	4.875	105	7.875	-2.83	0.0590129	-6.91	0.000997758	0.944276	0.000996763	0.000941219
48	13.3333	66	4.95	106	7.95	-2.932	0.0532904	-7.012	0.000901005	0.949406	0.000900194	0.000854649
48	13.3333	84	6.3	124	9.3	-4.768	0.00849736	-8.848	0.000143669	0.991574	0.000143648	0.000142438
50.087	13.913	13	0.934375	54.7391	3.93438	2.7933	16.3349	-1.46409	0.231289	0.0576871	0.187843	0.0108361
50.087	13.913	3	0.215625	44.7391	3.21562	3.8133	45.2999	-0.444087	0.64141	0.0215983	0.390768	0.00843993
50.087	13.913	4	0.2875	45.7391	3.2875	3.7113	40.9071	-0.546087	0.579212	0.0238623	0.366773	0.00875204
50.087	13.913	12	0.8625	53.7391	3.8625	2.8953	18.089	-1.36209	0.256126	0.0523862	0.203901	0.0106816
50.087	13.913	15	1.07812	56.7391	4.07812	2.5893	13.3205	-1.66809	0.188608	0.06983	0.158679	0.0110806
50.087	13.913	47	3.37812	88.7391	6.37812	-0.674696	0.509311	-4.93209	0.00721144	0.662554	0.00715981	0.00474376
50.087	13.913	66	4.74375	107.739	7.74375	-2.6127	0.0733366	-6.87009	0.00103839	0.931674	0.00103731	0.000966435
52.3636	14.5455	2	0.1375	45.6364	3.1375	4.26364	71.0679	-0.187273	0.829218	0.0138758	0.453318	0.00629015
52.3636	14.5455	6	0.4125	49.6364	3.4125	3.85564	47.2587	-0.595273	0.551412	0.0207217	0.355426	0.00736502
52.3636	14.5455	6	0.4125	49.6364	3.4125	3.85564	47.2587	-0.595273	0.551412	0.0207217	0.355426	0.00736502
52.3636	14.5455	8	0.55	51.6364	3.55	3.65164	38.5377	-0.799273	0.449656	0.0252923	0.310181	0.0078452
52.3636	14.5455	10	0.6875	53.6364	3.6875	3.44764	31.426	-1.00327	0.366677	0.0308394	0.268298	0.00827417
52.3636	14.5455	10	0.6875	53.6364	3.6875	3.44764	31.426	-1.00327	0.366677	0.0308394	0.268298	0.00827417
52.3636	14.5455	10	0.6875	53.6364	3.6875	3.44764	31.426	-1.00327	0.366677	0.0308394	0.268298	0.00827417
52.3636	14.5455	15	1.03125	58.6364	4.03125	2.93764	18.8712	-1.51327	0.220188	0.0503241	0.180454	0.0090812
52.3636	14.5455	80	5.5	123.636	8.5	-3.69236	0.024913	-8.14327	0.000290684	0.975693	0.0002906	0.000283536
52.3636	14.5455	87	5.98125	130.636	8.98125	-4.40636	0.0121995	-8.85727	0.000142343	0.987948	0.000142322	0.000140607
52.3636	14.5455	76	5.225	119.636	8.225	-3.28436	0.0374644	-7.73527	0.000437133	0.963888	0.000436942	0.000421163
52.3636	14.5455	8	0.55	51.6364	3.55	3.65164	38.5377	-0.799273	0.449656	0.0252923	0.310181	0.0078452
52.3636	14.5455	14	0.9625	57.6364	3.9625	3.03964	20.8976	-1.41127	0.243833	0.045667	0.196033	0.00895226
52.3636	14.5455	16	1.1	59.6364	4.1	2.83564	17.0412	-1.61527	0.198836	0.0554286	0.165858	0.00919326
52.3636	14.5455	50	3.4375	93.6364	6.4375	-0.632364	0.531334	-5.08327	0.00619959	0.653025	0.00616139	0.00402354
53.3333	14.8148	2	0.135	46.4444	3.135	4.412	82.4342	-0.121333	0.885739	0.0119855	0.469704	0.00562963
53.8318	14.9533	87	5.81813	131.86	8.81813	-4.18174	0.0152719	-8.75744	0.000157287	0.984958	0.000157262	0.000154897
54.8571	15.2381	15	0.984375	60.7143	3.98438	3.31914	27.6367	-1.34371	0.260875	0.0349203	0.2069	0.007225
54.8571	15.2381	14	0.91875	59.7143	3.91875	3.42114	30.6044	-1.24171	0.288889	0.0316412	0.224138	0.00709199
54.8571	15.2381	15	0.984375	60.7143	3.98438	3.31914	27.6367	-1.34371	0.260875	0.0349203	0.2069	0.007225
54.8571	15.2381	63	4.13438	108.714	7.13438	-1.57686	0.206623	-6.23971	0.00195041	0.828759	0.00194662	0.00161328
54.8571	15.2381	80	5.25	125.714	8.25	-3.31086	0.0364849	-7.97371	0.000344397	0.964799	0.000344279	0.00033216
54.8571	15.2381	86	5.64375	131.714	8.64375	-3.92286	0.0197845	-8.58571	0.000186755	0.980599	0.00018672	0.000183097
54.8571	15.2381	49	3.21563	94.7143	6.21563	-0.148857	0.861692	-4.81171	0.0081339	0.537146	0.00806828	0.00433384
54.8571	15.2381	70	4.59375	115.714	7.59375	-2.29086	0.10118	-6.95371	0.000955081	0.908117	0.00095417	0.000866498
54.8571	15.2381	82	5.38125	127.714	8.38125	-3.51486	0.0297521	-8.17771	0.000280843	0.971108	0.000280764	0.000272652
54.8571	15.2381	60	3.9375	105.714	6.9375	-1.27086	0.280591	-5.93371	0.00264863	0.780889	0.00264163	0.00206282
54.8571	15.2381	67	4.39687	112.714	7.39687	-1.98486	0.1374	-6.64771	0.00129698	0.879198	0.0012953	0.00113883
54.8571	15.2381	2	0.13125	47.7143	3.13125	4.64514	104.078	-0.0177143	0.982442	0.00951672	0.495572	0.00471622
54.8571	15.2381	3	0.196875	48.7143	3.19687	4.54314	93.9857	-0.119714	0.887174	0.0105279	0.470107	0.00494924
54.8571	15.2381	4	0.2625	49.7143	3.2625	4.44114	84.8719	-0.221714	0.801144	0.0116453	0.444797	0.00517978
54.8571	15.2381	8	0.525	53.7143	3.525	4.03314	56.438	-0.629714	0.532744	0.0174101	0.347575	0.00605131
54.8571	15.2381	15	0.984375	60.7143	3.98437	3.31914	27.6367	-1.34371	0.260875	0.0349203	0.2069	0.007225
54.8571	15.2381	50	3.28125	95.7143	6.28125	-0.250857	0.778134	-4.91371	0.00734516	0.562387	0.0072916	0.0041007
54.8571	15.2381	61	4.00312	106.714	7.00312	-1.37286	0.253382	-6.03571	0.00239179	0.797841	0.00238608	0.00190371
54.8571	15.2381	83	5.44687	128.714	8.44687	-3.61686	0.026867	-8.27971	0.00025361	0.973836	0.000253545	0.000246912
56.4706	15.6863	10	0.6375	57.0588	3.6375	4.076	58.9094	-0.724	0.484809	0.0166919	0.326513	0.00545011
57.6	16	1	0.0625	49	3.0625	5.1668	175.353	0.2708	1.31101	0.00567045	0.567289	0.00321679
57.6	16	2	0.125	50	3.125	5.0648	158.349	0.1688	1.18388	0.00627554	0.5421	0.00340197
57.6	16	3	0.1875	51	3.1875	4.9628	142.994	0.0668	1.06908	0.00694475	0.516694	0.00358831
57.6	16	4	0.25	52	3.25	4.8608	129.127	-0.0352	0.965412	0.00768477	0.491201	0.00377477
57.6	16	4	0.25	52	3.25	4.8608	129.127	-0.0352	0.965412	0.00768477	0.491201	0.00377477
57.6	16	6	0.375	54	3.375	4.6568	105.299	-0.2392	0.787257	0.00940746	0.440484	0.00414383
57.6	16	10	0.625	58	3.625	4.2488	70.0213	-0.6472	0.52351	0.0140803	0.343621	0.00483828
57.6	16	10	0.625	58	3.625	4.2488	70.0213	-0.6472	0.52351	0.0140803	0.343621	0.00483828
57.6	16	15	0.9375	63	3.9375	3.7388	42.0475	-1.1572	0.314365	0.0232302	0.239176	0.0055561
57.6	16	15	0.9375	63	3.9375	3.7388	42.0475	-1.1572	0.314365	0.0232302	0.239176	0.0055561
57.6	16	16	1	64	4	3.6368	37.9701	-1.2592	0.283881	0.0256607	0.221112	0.00567387
57.6	16	17	1.0625	65	4.0625	3.5348	34.2882	-1.3612	0.256353	0.0283381	0.204045	0.00578226
57.6	16	17	1.0625	65	4.0625	3.5348	34.2882	-1.3612	0.256353	0.0283381	0.204045	0.00578226
57.6	16	17	1.0625	65	4.0625	3.5348	34.2882	-1.3612	0.256353	0.0283381	0.204045	0.00578226
57.6	16	18	1.125	66	4.125	3.4328	30.9632	-1.4632	0.231494	0.031286	0.187978	0.00588108
57.6	16	22	1.375	70	4.375	3.0248	20.5899	-1.8712	0.153939	0.046318	0.133403	0.00617895
57.6	16	31	1.9375	79	4.9375	2.1068	8.22189	-2.7892	0.0614704	0.108438	0.0579106	0.00627969
57.6	16	50	3.125	98	6.125	0.1688	1.18388	-4.7272	0.00885122	0.4579	0.00877356	0.00401741
57.6	16	50	3.125	98	6.125	0.1688	1.18388	-4.7272	0.00885122	0.4579	0.00877356	0.00401741
57.6	16	50	3.125	98	6.125	0.1688	1.18388	-4.7272	0.00885122	0.4579	0.00877356	0.00401741
57.6	16	62	3.875	110	6.875	-1.0552	0.348123	-5.9512	0.00260272	0.741772	0.00259596	0.00192561
57.6	16	63	3.9375	111	6.9375	-1.1572	0.314365	-6.0532	0.00235033	0.760824	0.00234482	0.00178399
57.6	16	65	4.0625	113	7.0625	-1.3612	0.256353	-6.2572	0.0019166	0.795955	0.00191294	0.00152261
57.6	16	66	4.125	114	7.125	-1.4632	0.231494	-6.3592	0.00173075	0.812022	0.00172776	0.00140298
57.6	16	72	4.5	120	7.5	-2.0752	0.125531	-6.9712	0.000938526	0.888469	0.000937646	0.00083307
57.6	16	77	4.8125	125	7.8125	-2.5852	0.075381	-7.4812	0.000563581	0.929903	0.000563263	0.00052378
57.6	16	78	4.875	126	7.875	-2.6872	0.0680713	-7.5832	0.00050893	0.936267	0.000508671	0.000476252
57.6	16	30	1.875	78	4.875	2.2088	9.10478	-2.6872	0.0680713	0.098963	0.0637329	0.0063072
57.6	16	51	3.1875	99	6.1875	0.0668	1.06908	-4.8292	0.00799291	0.483306	0.00792953	0.00383239
58.7755	16.3265	75	4.59375	123.98	7.59375	-2.20135	0.110654	-7.19727	0.00074863	0.90037	0.00074807	0.00067354
59.3814	16.4948	45	2.72813	94.4845	5.72813	0.951361	2.58923	-4.09606	0.0166381	0.278611	0.0163658	0.00455969
60	16.6667	80	4.8	130	7.8	-2.524	0.0801384	-7.624	0.000488584	0.925807	0.000488345	0.000452113
60.6316	16.8421	15	0.890625	65.5263	3.89063	4.20263	66.8621	-0.951053	0.386334	0.0147358	0.278673	0.00410647
60.6316	16.8421	20	1.1875	70.5263	4.1875	3.69263	40.1504	-1.46105	0.231992	0.0243011	0.188306	0.00457606
60.6316	16.8421	49	2.90938	99.5263	5.90938	0.734632	2.08471	-4.41905	0.0120456	0.324179	0.0119023	0.00385847
60.6316	16.8421	46	2.73125	96.5263	5.73125	1.04063	2.831	-4.11305	0.0163578	0.261028	0.0160945	0.00420112
60.6316	16.8421	17	1.00938	67.5263	4.00938	3.99863	54.5235	-1.15505	0.315041	0.0180104	0.239567	0.0043147
60.6316	16.8421	20	1.1875	70.5263	4.1875	3.69263	40.1504	-1.46105	0.231992	0.0243011	0.188306	0.00457606
60.6316	16.8421	49	2.90938	99.5263	5.90938	0.734632	2.08471	-4.41905	0.0120456	0.324179	0.0119023	0.00385847
60.6316	16.8421	49	2.90938	99.5263	5.90938	0.734632	2.08471	-4.41905	0.0120456	0.324179	0.0119023	0.00385847
60.6316	16.8421	20	1.1875	70.5263	4.1875	3.69263	40.1504	-1.46105	0.231992	0.0243011	0.188306	0.00457606
60.6316	16.8421	20	1.1875	70.5263	4.1875	3.69263	40.1504	-1.46105	0.231992	0.0243011	0.188306	0.00457606
60.6316	16.8421	23	1.36562	73.5263	4.36562	3.38663	29.5662	-1.76705	0.170836	0.0327159	0.145909	0.00477355
60.6316	16.8421	48	2.85	98.5263	5.85	0.836632	2.30858	-4.31705	0.0133391	0.302245	0.0131636	0.00397861
60.6316	16.8421	82	4.86875	132.526	7.86875	-2.63137	0.0719799	-7.78505	0.000415905	0.932853	0.000415733	0.000387817
60.6316	16.8421	88	5.225	138.526	8.225	-3.24337	0.0390322	-8.39705	0.000225531	0.962434	0.00022548	0.00021701
60.6316	16.8421	5	0.296875	55.5263	3.29687	5.22263	185.421	0.0689474	1.07138	0.00536419	0.51723	0.00277452
60.6316	16.8421	15	0.890625	65.5263	3.89062	4.20263	66.8621	-0.951053	0.386334	0.0147358	0.278673	0.00410647
60.6316	16.8421	32	1.9	82.5263	4.9	2.46863	11.8063	-2.68505	0.0682176	0.0780867	0.0638611	0.00498671
60.6316	16.8421	33	1.95937	83.5263	4.95937	2.36663	10.6614	-2.78705	0.0616025	0.0857529	0.0580279	0.00497605
60.6316	16.8421	49	2.90937	99.5263	5.90937	0.734632	2.08471	-4.41905	0.0120456	0.324179	0.0119023	0.00385847
62.6087	17.3913	49	2.8175	101.174	5.8175	1.03713	2.82111	-4.28461	0.013779	0.261704	0.0135917	0.00355701
64	17.7778	77	4.33125	130.333	7.33125	-1.606	0.200689	-7.046	0.000870886	0.832855	0.000870128	0.000724691
64	17.7778	18	1.0125	71.3333	4.0125	4.412	82.4342	-1.028	0.357722	0.0119855	0.263472	0.00315784
64	17.7778	35	1.96875	88.3333	4.96875	2.678	14.556	-2.762	0.0631653	0.0642841	0.0594125	0.00381928
64	17.7778	22	1.2375	75.3333	4.2375	4.004	54.817	-1.436	0.237877	0.0179157	0.192166	0.00344278
64	17.7778	85	4.78125	138.333	7.78125	-2.422	0.088744	-7.862	0.000385103	0.91849	0.000384955	0.000353577
64	17.7778	17	0.95625	70.3333	3.95625	4.514	91.2862	-0.926	0.396135	0.0108359	0.283737	0.00307453
64	17.7778	24	1.35	77.3333	4.35	3.8	44.7012	-1.64	0.19398	0.0218813	0.162465	0.00355494
64	17.7778	32	1.8	85.3333	4.8	2.984	19.7667	-2.456	0.0857774	0.048154	0.0790009	0.00380421
64	17.7778	33	1.85625	86.3333	4.85625	2.882	17.8499	-2.558	0.0774595	0.0530506	0.0718909	0.00381385
64	17.7778	36	2.025	89.3333	5.025	2.576	13.1445	-2.864	0.0570401	0.0706991	0.0539621	0.00381507
64	17.7778	38	2.1375	91.3333	5.1375	2.372	10.7188	-3.068	0.0465141	0.0853329	0.0444467	0.00379277
64	17.7778	47	2.64375	100.333	5.64375	1.454	4.2802	-3.986	0.0185739	0.189387	0.0182352	0.0034535
64	17.7778	49	2.75625	102.333	5.75625	1.25	3.49034	-4.19	0.0151463	0.2227	0.0149203	0.00332275
65.4545	18.1818	81	4.455	135.545	7.455	-1.79145	0.166717	-7.35509	0.000639329	0.857106	0.000638921	0.000547623
67.7647	18.8235	17	0.903125	73.4706	3.90313	5.09	162.39	-0.67	0.511709	0.00612033	0.338497	0.00207171
67.7647	18.8235	18	0.95625	74.4706	3.95625	4.988	146.643	-0.772	0.462088	0.0067731	0.316047	0.00214062
67.7647	18.8235	20	1.0625	76.4706	4.0625	4.784	119.582	-0.976	0.376815	0.00829313	0.273686	0.00226972
67.7647	18.8235	33	1.75313	89.4706	4.75313	3.458	31.7534	-2.302	0.100059	0.0305312	0.0909575	0.00277704
67.7647	18.8235	45	2.39063	101.471	5.39063	2.234	9.33714	-3.526	0.0294224	0.0967386	0.0285814	0.00276493
67.7647	18.8235	66	3.50625	122.471	6.50625	0.092	1.09636	-5.668	0.00345477	0.477016	0.00344287	0.00164231
67.7647	18.8235	18	0.95625	74.4706	3.95625	4.988	146.643	-0.772	0.462088	0.0067731	0.316047	0.00214062
71.1111	19.7531	79	3.99938	138.259	6.99938	-0.722	0.48578	-6.76644	0.00115178	0.673047	0.00115046	0.000774312
76.8	21.3333	16	0.75	80	3.75	6.5744	716.516	0.0464	1.04749	0.0013937	0.511598	0.000713013
82.2857	22.8571	56	2.45	124.571	5.45	3.33371	28.0423	-3.66057	0.0257178	0.0344325	0.025073	0.000863326
安虹路	headway=2.0
黄灯启亮时的速度_decision speed（km/h）	decision speed(m/s)	黄灯启亮时的距离_leading(m)	Estimated time to stop line_leading(s)	黄灯启亮时的距离_following	Estimated Time to Stop Line_following	logit（p）_leading	EXP_leading	logit（p）_following	EXP_following	P(stop)_leading	P(cross)_following	Probablity(rear-end)
19.2	5.33333	16	3	26.6667	5	0.5546	1.74124	-0.5334	0.586607	0.364798	0.369724	0.134875
24.5106	6.80851	82	12.0438	95.617	14.0438	-5.36487	0.00467806	-6.75381	0.00116643	0.995344	0.00116507	0.00115964
25.8296	7.17489	43	5.99312	57.3498	7.99312	-1.18507	0.305724	-2.64875	0.0707397	0.765858	0.0660662	0.0505973
37.1613	10.3226	5	0.484375	25.6452	2.48438	4.42468	83.4859	2.31887	10.1642	0.0118363	0.910428	0.0107761
38.1457	10.596	59	5.56812	80.1921	7.56812	-0.932709	0.393486	-3.0943	0.0453068	0.717624	0.0433431	0.031104
38.4	10.6667	86	8.0625	107.333	10.0625	-3.6478	0.0260484	-5.8238	0.00295635	0.974613	0.00294764	0.0028728
38.4	10.6667	85	7.96875	106.333	9.96875	-3.5458	0.0288455	-5.7218	0.00327381	0.971963	0.00326313	0.00317164
38.6577	10.7383	79	7.35688	100.477	9.35688	-2.89437	0.0553339	-5.08497	0.00618905	0.947567	0.00615098	0.00582847
39.7241	11.0345	18	1.63125	40.069	3.63125	3.49079	32.812	1.23976	3.45478	0.0295753	0.775522	0.0229363
39.7241	11.0345	58	5.25625	80.069	7.25625	-0.589207	0.554767	-2.84024	0.0584116	0.643183	0.055188	0.035496
40	11.1111	64	5.76	86.2222	7.76	-1.159	0.3138	-3.42567	0.0325276	0.761151	0.0315029	0.0239784
41.1429	11.4286	1	0.0875	23.8571	2.0875	5.44186	230.871	3.11043	22.4307	0.00431275	0.957321	0.00412869
41.1429	11.4286	66	5.775	88.8571	7.775	-1.18814	0.304787	-3.51957	0.0296121	0.766409	0.0287605	0.0220423
41.1429	11.4286	1	0.0875	23.8571	2.0875	5.44186	230.871	3.11043	22.4307	0.00431275	0.957321	0.00412869
41.1429	11.4286	77	6.7375	99.8571	8.7375	-2.31014	0.0992471	-4.64157	0.00964253	0.909714	0.00955044	0.00868817
41.4388	11.5108	46	3.99625	69.0216	5.99625	0.897144	2.45259	-1.45106	0.234322	0.289638	0.189839	0.0549845
41.7391	11.5942	79	6.81375	102.188	8.81375	-2.42291	0.088663	-4.78813	0.00832801	0.918558	0.00825923	0.00758658
42.6667	11.8519	17	1.43438	40.7037	3.43438	4.043	56.9971	1.62522	5.07955	0.0172422	0.835514	0.0144061
42.6667	11.8519	34	2.86875	57.7037	4.86875	2.309	10.0644	-0.108778	0.89693	0.0903803	0.472832	0.0427347
42.6667	11.8519	3	0.253125	26.7037	2.25312	5.471	237.698	3.05322	21.1835	0.0041894	0.954921	0.00400055
43.3083	12.0301	15	1.24688	39.0602	3.24688	4.34517	77.1048	1.89103	6.62619	0.0128033	0.868873	0.0111245
44.3077	12.3077	20	1.625	44.6154	3.625	3.98808	53.951	1.47731	4.38113	0.018198	0.814166	0.0148162
44.3077	12.3077	22	1.7875	46.6154	3.7875	3.78408	43.995	1.27331	3.57265	0.0222247	0.781308	0.0173643
44.3077	12.3077	10	0.8125	34.6154	2.8125	5.00808	149.617	2.49731	12.1497	0.00663937	0.923953	0.00613446
44.3077	12.3077	52	4.225	76.6154	6.225	0.724077	2.06283	-1.78669	0.167513	0.326496	0.143479	0.0468452
44.3077	12.3077	7	0.56875	31.6154	2.56875	5.31408	203.177	2.80331	16.4991	0.00489771	0.942854	0.00461783
44.3077	12.3077	2	0.1625	26.6154	2.1625	5.82408	338.349	3.31331	27.4759	0.00294682	0.964883	0.00284334
45.3543	12.5984	49	3.88937	74.1969	5.88937	1.19021	3.28778	-1.37987	0.251612	0.233221	0.20103	0.0468845
46.08	12.8	20	1.5625	45.6	3.5625	4.25924	70.7562	1.64804	5.19678	0.0139361	0.838626	0.0116872
46.08	12.8	33	2.57812	58.6	4.57812	2.93324	18.7884	0.32204	1.37994	0.0505346	0.579821	0.0293011
46.08	12.8	33	2.57812	58.6	4.57812	2.93324	18.7884	0.32204	1.37994	0.0505346	0.579821	0.0293011
46.08	12.8	32	2.5	57.6	4.5	3.03524	20.806	0.42404	1.52812	0.045859	0.60445	0.0277195
47.2131	13.1148	7	0.53375	33.2295	2.53375	5.75861	316.906	3.0832	21.8281	0.00314558	0.956194	0.00300779
47.2131	13.1148	24	1.83	50.2295	3.83	4.02461	55.9583	1.3492	3.85433	0.0175567	0.793998	0.01394
47.6033	13.2231	40	3.025	66.4463	5.025	2.45231	11.6151	-0.245215	0.782536	0.0792701	0.439002	0.0347997
48	13.3333	40	3	66.6667	5	2.513	12.3419	-0.207	0.81302	0.0749518	0.448434	0.033611
48	13.3333	4	0.3	30.6667	2.3	6.185	485.413	3.465	31.9765	0.00205587	0.969675	0.00199352
48	13.3333	14	1.05	40.6667	3.05	5.165	175.037	2.445	11.5305	0.00568061	0.920195	0.00522727
48	13.3333	18	1.35	44.6667	3.35	4.757	116.396	2.037	7.66757	0.00851816	0.884627	0.0075354
48	13.3333	85	6.375	111.667	8.375	-2.077	0.125306	-4.797	0.00825447	0.888648	0.00818689	0.00727526
48	13.3333	77	5.775	103.667	7.775	-1.261	0.283371	-3.981	0.018667	0.779198	0.0183249	0.0142787
48	13.3333	31	2.325	57.6667	4.325	3.431	30.9075	0.711	2.03603	0.0313406	0.670622	0.0210177
48	13.3333	12	0.9	38.6667	2.9	5.369	214.648	2.649	14.1399	0.00463718	0.933949	0.00433089
48	13.3333	47	3.525	73.6667	5.525	1.799	6.0436	-0.921	0.398121	0.141973	0.284754	0.0404274
48.4034	13.4454	33	2.45437	59.8908	4.45437	3.28871	26.8084	0.545857	1.72609	0.0359604	0.633174	0.0227692
48.8136	13.5593	53	3.90875	80.1186	5.90875	1.31147	3.71164	-1.45463	0.233487	0.21224	0.18929	0.040175
49.6552	13.7931	28	2.03	55.5862	4.03	3.99024	54.0679	1.17645	3.24284	0.0181594	0.764309	0.0138794
49.6552	13.7931	34	2.465	61.5862	4.465	3.37824	29.3192	0.564448	1.75848	0.0329824	0.637481	0.0210257
50.087	13.913	13	0.934375	40.8261	2.93438	5.5863	266.748	2.74804	15.6121	0.00373486	0.939803	0.00351003
50.087	13.913	38	2.73125	65.8261	4.73125	3.0363	20.8281	0.198043	1.21902	0.0458125	0.54935	0.0251671
50.087	13.913	45	3.23438	72.8261	5.23438	2.3223	10.1991	-0.515957	0.596929	0.0892925	0.373798	0.0333774
50.087	13.913	19	1.36562	46.8261	3.36562	4.9743	144.648	2.13604	8.46588	0.00686586	0.894357	0.00614053
50.9735	14.1593	32	2.26	60.3186	4.26	3.78394	43.9889	0.895442	2.44842	0.0222277	0.710012	0.0157819
51.4286	14.2857	17	1.19	45.5714	3.19	5.38357	217.799	2.46929	11.814	0.00457041	0.92196	0.00421374
51.8919	14.4144	86	5.96625	114.829	7.96625	-1.58354	0.205247	-4.52408	0.0108447	0.829705	0.0107283	0.00890135
52.3636	14.5455	8	0.55	37.0909	2.55	6.44464	629.318	3.47736	32.3743	0.0015865	0.970037	0.00153896
52.3636	14.5455	23	1.58125	52.0909	3.58125	4.91464	136.27	1.94736	7.01018	0.00728493	0.875159	0.00637547
52.3636	14.5455	24	1.65	53.0909	3.65	4.81264	123.056	1.84536	6.3304	0.0080609	0.863582	0.00696125
52.844	14.6789	50	3.40625	79.3578	5.40625	2.23414	9.33843	-0.760358	0.467499	0.0967265	0.318569	0.030814
52.844	14.6789	63	4.29187	92.3578	6.29187	0.908138	2.4797	-2.08636	0.124138	0.287381	0.11043	0.0317355
53.8318	14.9533	49	3.27688	78.9065	5.27688	2.48726	12.0283	-0.563206	0.569381	0.076756	0.362806	0.0278476
53.8318	14.9533	63	4.21313	92.9065	6.21313	1.05926	2.88424	-1.99121	0.136531	0.257451	0.120129	0.0309274
53.8318	14.9533	75	5.01563	104.907	7.01563	-0.164738	0.848116	-3.21521	0.0401471	0.541092	0.0385975	0.0208848
54.3396	15.0943	2	0.1325	32.1887	2.1325	7.35896	1570.21	4.27972	72.22	0.000636454	0.986343	0.000627761
54.3396	15.0943	67	4.43875	97.1887	6.43875	0.728962	2.07293	-2.35028	0.0953422	0.325422	0.0870433	0.0283258
54.8571	15.2381	32	2.1	62.4762	4.1	4.37814	79.6899	1.26957	3.55933	0.0123931	0.780669	0.00967493
54.8571	15.2381	84	5.5125	114.476	7.5125	-0.925857	0.396192	-4.03443	0.0176958	0.716234	0.0173881	0.0124539
54.8571	15.2381	62	4.06875	92.4762	6.06875	1.31814	3.73648	-1.79043	0.166889	0.211127	0.14302	0.0301955
54.8571	15.2381	50	3.28125	80.4762	5.28125	2.54214	12.7069	-0.566429	0.567549	0.0729561	0.362061	0.0264146
54.8571	15.2381	60	3.9375	90.4762	5.9375	1.52214	4.58203	-1.58643	0.204655	0.179146	0.169887	0.0304346
54.8571	15.2381	41	2.69062	71.4762	4.69062	3.46014	31.8215	0.351571	1.4213	0.0304678	0.586999	0.0178846
55.3846	15.3846	36	2.34	66.7692	4.34	4.05085	57.446	0.912385	2.49025	0.0171098	0.713488	0.0122076
56.4706	15.6863	69	4.39875	100.373	6.39875	0.851	2.34199	-2.349	0.0954646	0.299223	0.0871453	0.0260759
56.4706	15.6863	82	5.2275	113.373	7.2275	-0.475	0.621885	-3.675	0.0253494	0.616567	0.0247227	0.0152432
56.4706	15.6863	55	3.50625	86.3725	5.50625	2.279	9.76691	-0.921	0.398121	0.0928772	0.284754	0.0264472
57.0297	15.8416	3	0.189375	34.6832	2.18938	7.66854	2139.96	4.43686	84.5093	0.000467079	0.988305	0.000461617
57.6	16	10	0.625	42	2.625	7.0418	1143.44	3.7778	43.7198	0.000873787	0.977639	0.000854248
57.6	16	17	1.0625	49	3.0625	6.3278	559.923	3.0638	21.4088	0.00178277	0.955375	0.00170322
57.6	16	7	0.4375	39	2.4375	7.3478	1552.78	4.0838	59.3707	0.000643593	0.983436	0.000632932
57.6	16	17	1.0625	49	3.0625	6.3278	559.923	3.0638	21.4088	0.00178277	0.955375	0.00170322
57.6	16	10	0.625	42	2.625	7.0418	1143.44	3.7778	43.7198	0.000873787	0.977639	0.000854248
57.6	16	4	0.25	36	2.25	7.6538	2108.64	4.3898	80.6243	0.000474014	0.987749	0.000468207
57.6	16	45	2.8125	77	4.8125	3.4718	32.1946	0.2078	1.23097	0.0301253	0.551764	0.0166221
57.6	16	8	0.5	40	2.5	7.2458	1402.2	3.9818	53.6135	0.000712655	0.981689	0.000699606
57.6	16	31	1.9375	63	3.9375	4.8998	134.263	1.6358	5.13356	0.00739301	0.836963	0.00618767
57.6	16	47	2.9375	79	4.9375	3.2678	26.2535	0.0038	1.00381	0.0366925	0.50095	0.0183811
57.6	16	36	2.25	68	4.25	4.3898	80.6243	1.1258	3.08268	0.0122513	0.755063	0.00925047
57.6	16	47	2.9375	79	4.9375	3.2678	26.2535	0.0038	1.00381	0.0366925	0.50095	0.0183811
57.6	16	34	2.125	66	4.125	4.5938	98.8694	1.3298	3.78029	0.0100131	0.790808	0.00791842
57.6	16	26	1.625	58	3.625	5.4098	223.587	2.1458	8.54888	0.00445262	0.895276	0.00398632
57.6	16	34	2.125	66	4.125	4.5938	98.8694	1.3298	3.78029	0.0100131	0.790808	0.00791842
57.6	16	75	4.6875	107	6.6875	0.4118	1.50953	-2.8522	0.0577172	0.398481	0.0545677	0.0217442
59.3814	16.4948	48	2.91	80.9897	4.91	3.43836	31.1359	0.0734124	1.07617	0.0311179	0.518345	0.0161298
60	16.6667	3	0.18	36.3333	2.18	8.123	3371.12	4.723	112.505	0.000296549	0.99119	0.000293937
60	16.6667	3	0.18	36.3333	2.18	8.123	3371.12	4.723	112.505	0.000296549	0.99119	0.000293937
60.6316	16.8421	7	0.415625	40.6842	2.41563	7.81163	2469.16	4.37584	79.5068	0.000404833	0.987579	0.000399804
60.6316	16.8421	24	1.425	57.6842	3.425	6.07763	435.995	2.64184	14.039	0.00228835	0.933506	0.00213619
60.6316	16.8421	4	0.2375	37.6842	2.2375	8.11763	3353.07	4.68184	107.969	0.000298145	0.990823	0.000295409
60.6316	16.8421	67	3.97812	100.684	5.97812	1.69163	5.42833	-1.74416	0.174792	0.155561	0.148786	0.0231453
60.6316	16.8421	15	0.890625	48.6842	2.89062	6.99563	1091.85	3.55984	35.1576	0.000915036	0.972343	0.000889729
60.6316	16.8421	17	1.00937	50.6842	3.00937	6.79163	890.365	3.35584	28.6697	0.00112187	0.966296	0.00108406
60.6316	16.8421	36	2.1375	69.6842	4.1375	4.85363	128.205	1.41784	4.1282	0.00773963	0.805	0.0062304
60.6316	16.8421	78	4.63125	111.684	6.63125	0.569632	1.76762	-2.86616	0.0569172	0.361322	0.0538521	0.0194579
61.2766	17.0213	33	1.93875	67.0426	3.93875	5.25832	192.158	1.78598	5.96542	0.0051771	0.856434	0.00443384
62.6087	17.3913	33	1.8975	67.7826	3.8975	5.46213	235.599	1.9143	6.78222	0.00422656	0.871502	0.00368346
62.6087	17.3913	52	2.99	86.7826	4.99	3.52413	33.9243	-0.0236957	0.976583	0.0286334	0.494076	0.0141471
62.6087	17.3913	30	1.725	64.7826	3.725	5.76813	319.939	2.2203	9.21013	0.00311586	0.902058	0.00281068
64	17.7778	3	0.16875	38.5556	2.16875	8.735	6216.73	5.10833	165.394	0.00016083	0.99399	0.000159864
64	17.7778	18	1.0125	53.5556	3.0125	7.205	1346.14	3.57833	35.8138	0.000742311	0.972836	0.000722147
64	17.7778	34	1.9125	69.5556	3.9125	5.573	263.223	1.94633	7.00296	0.00378469	0.875046	0.00331178
64	17.7778	50	2.8125	85.5556	4.8125	3.941	51.47	0.314333	1.36935	0.0190585	0.577943	0.0110147
64	17.7778	58	3.2625	93.5556	5.2625	3.125	22.7599	-0.501667	0.605521	0.0420877	0.377149	0.0158733
64	17.7778	8	0.45	43.5556	2.45	8.225	3733.12	4.59833	99.3186	0.000267801	0.990032	0.000265131
64	17.7778	49	2.75625	84.5556	4.75625	4.043	56.9971	0.416333	1.51639	0.0172422	0.602606	0.0103903
64	17.7778	47	2.64375	82.5556	4.64375	4.247	69.8954	0.620333	1.85955	0.0141053	0.650294	0.00917259
64	17.7778	66	3.7125	101.556	5.7125	2.309	10.0644	-1.31767	0.267759	0.0903803	0.211207	0.0190889
64.7191	17.9775	34	1.89125	69.9551	3.89125	5.68302	293.836	2.01561	7.50528	0.00339171	0.882426	0.00299294
64.7191	17.9775	65	3.61563	100.955	5.61563	2.52102	12.4413	-1.14639	0.317781	0.0743975	0.241148	0.0179408
65.4545	18.1818	38	2.09	74.3636	4.09	5.38755	218.666	1.67845	5.35727	0.00455237	0.8427	0.00383628
65.4545	18.1818	62	3.41	98.3636	5.41	2.93955	18.9073	-0.769545	0.463224	0.050233	0.316577	0.0159026
65.4545	18.1818	36	1.98	72.3636	3.98	5.59155	268.15	1.88245	6.56961	0.0037154	0.867893	0.00322457
66.9767	18.6047	49	2.63375	86.2093	4.63375	4.49844	89.877	0.703093	2.01999	0.0110039	0.668873	0.0073602
67.7647	18.8235	18	0.95625	55.6471	2.95625	7.781	2394.67	3.941	51.47	0.00041742	0.980942	0.000409465
67.7647	18.8235	29	1.54063	66.6471	3.54063	6.659	779.771	2.819	16.7601	0.00128079	0.943694	0.00120867
67.7647	18.8235	15	0.796875	52.6471	2.79687	8.087	3251.92	4.247	69.8954	0.000307416	0.985895	0.00030308
67.7647	18.8235	49	2.60312	86.6471	4.60312	4.619	101.393	0.779	2.17929	0.00976633	0.685465	0.00669447
68.5714	19.0476	49	2.5725	87.0952	4.5725	4.74243	114.712	0.856714	2.35541	0.00864211	0.701974	0.00606654
68.5714	19.0476	37	1.9425	75.0952	3.9425	5.96643	390.11	2.08071	8.01019	0.00255683	0.889015	0.00227306
68.5714	19.0476	23	1.2075	61.0952	3.2075	7.39443	1626.9	3.50871	33.4053	0.00061429	0.970935	0.000596436
69.3976	19.2771	73	3.78688	111.554	5.78688	2.42083	11.2552	-1.5117	0.220535	0.0815979	0.180687	0.0147437
69.3976	19.2771	54	2.80125	92.5542	4.80125	4.35883	78.1657	0.426301	1.53158	0.0126317	0.60499	0.00764207
69.3976	19.2771	36	1.8675	74.5542	3.8675	6.19483	490.209	2.2623	9.60517	0.00203579	0.905706	0.00184383
70.2439	19.5122	65	3.33125	104.024	5.33125	3.36632	28.9716	-0.614171	0.541089	0.0333649	0.351108	0.0117147
70.2439	19.5122	63	3.22875	102.024	5.22875	3.57032	35.5279	-0.410171	0.663537	0.0273764	0.398871	0.0109196
70.2439	19.5122	46	2.3575	85.0244	4.3575	5.30432	201.204	1.32383	3.75778	0.00494551	0.789818	0.00390605
71.1111	19.7531	56	2.835	95.5062	4.835	4.417	82.8474	0.38737	1.4731	0.0119264	0.59565	0.00710397
72	20	59	2.95	99	4.95	4.247	69.8954	0.167	1.18175	0.0141053	0.541653	0.00764017
72.9114	20.2532	66	3.25875	106.506	5.25875	3.67244	39.3479	-0.459203	0.631787	0.0247844	0.387175	0.00959591
73.8462	20.5128	40	1.95	81.0256	3.95	6.46746	643.847	2.28285	9.80455	0.00155075	0.907446	0.00140723
74.8052	20.7792	34	1.63625	75.5584	3.63625	7.22619	1374.98	2.98723	19.8308	0.000726755	0.951994	0.000691866
75.7895	21.0526	80	3.8	122.105	5.8	2.68479	14.6551	-1.60995	0.199898	0.0638769	0.166596	0.0106416
76.8	21.3333	49	2.29688	91.6667	4.29688	6.0014	403.994	1.6494	5.20386	0.00246917	0.83881	0.00207117
76.8	21.3333	49	2.29688	91.6667	4.29688	6.0014	403.994	1.6494	5.20386	0.00246917	0.83881	0.00207117
76.8	21.3333	51	2.39062	93.6667	4.39062	5.7974	329.442	1.4454	4.24355	0.00302625	0.809289	0.00244911
76.8	21.3333	76	3.5625	118.667	5.5625	3.2474	25.7234	-1.1046	0.331343	0.0374204	0.248879	0.00931316
76.8	21.3333	78	3.65625	120.667	5.65625	3.0434	20.9764	-1.3086	0.270198	0.0455033	0.212721	0.00967951
76.8	21.3333	10	0.46875	52.6667	2.46875	9.9794	21577.4	5.6274	277.939	4.63427e-05	0.996415	4.61766e-05
77.8378	21.6216	65	3.00625	108.243	5.00625	4.52819	92.5907	0.117378	1.12454	0.0106848	0.529311	0.00565559
77.8378	21.6216	71	3.28375	114.243	5.28375	3.91619	50.2087	-0.494622	0.609802	0.0195279	0.378805	0.00739728
78.9041	21.9178	67	3.05688	110.836	5.05688	4.48733	88.8837	0.0160959	1.01623	0.0111255	0.504024	0.00560751
78.9041	21.9178	66	3.01125	109.836	5.01125	4.58933	98.4283	0.118096	1.12535	0.0100575	0.52949	0.00532534
78.9041	21.9178	46	2.09875	89.8356	4.09875	6.62933	756.974	2.1581	8.65464	0.00131931	0.896423	0.00118266
78.9041	21.9178	80	3.65	123.836	5.65	3.16133	23.6019	-1.3099	0.269846	0.0406472	0.212503	0.00863765
80	22.2222	56	2.52	100.444	4.52	5.777	322.789	1.24367	3.46831	0.00308843	0.776202	0.00239724
82.2857	22.8571	50	2.1875	95.7143	4.1875	6.73871	844.474	2.07586	7.97138	0.00118277	0.888534	0.00105093
82.2857	22.8571	67	2.93125	112.714	4.93125	5.00471	149.114	0.341857	1.40756	0.00666158	0.584642	0.00389464
82.2857	22.8571	56	2.45	101.714	4.45	6.12671	457.929	1.46386	4.3226	0.00217899	0.812122	0.0017696
83.4783	23.1884	72	3.105	118.377	5.105	4.67717	107.466	-0.0532609	0.948133	0.00921948	0.486688	0.00448701
85.9701	23.8806	82	3.43375	129.761	5.43375	4.03843	56.7374	-0.833209	0.434652	0.0173198	0.302967	0.00524733
88.6154	24.6154	52	2.1125	101.231	4.1125	7.50315	1813.75	2.48162	11.9606	0.000551039	0.922843	0.000508522
88.6154	24.6154	50	2.03125	99.2308	4.03125	7.70715	2224.2	2.68562	14.6672	0.000449397	0.936172	0.000420713
92.9032	25.8065	83	3.21625	134.613	5.21625	4.99719	147.997	-0.267323	0.765426	0.00671153	0.433565	0.00290988
Rear-end Probability 对比分析
Front vehicle to stop line=3.0s；H=2.0s
绿苑路
黄灯启亮时的速度_decision speed（km/h）	decision speed(m/s)	Estimated Distance to Stop Line_leading	Front vehicle to stop line	Estimated Distance to Stop Line_following	Following vehicle to Stop Line_following	logit（p）_leading	EXP_leading	logit（p）_following	EXP_following	P(stop)_leading	P(cross)_following	Probablity(rear-end)		黄灯启亮时的速度_decision speed（km/h）	decision speed(m/s)	Estimated Distance to Stop Line	Front vehicle to stop line	Estimated Distance to Stop Line_following	Following vehicle to Stop Line_following	logit（p）_leading	EXP_leading	logit（p）_following	EXP_following	P(stop)_leading	P(cross)_following	Probablity(rear-end)	Increased Crash Probability
1	0.277778	0.833333	3	1.38889	5	-3.476	0.0309309	-3.53267	0.0292269	0.969997	0.0283969	0.0275449			0.277778	0.833333	3	1.38889	5	-0.683	0.505099
2	0.555556	1.66667	3	2.77778	5	-3.408	0.0331073	-3.52133	0.02956	0.967954	0.0287113	0.0277912		1	0.555556	1.66667	3	2.77778	5	-0.615	0.540641	-0.739667	0.477273	0.664408	0.323077	0.214655	-0.18711	H=2.0s	T=3.0s
3	0.833333	2.5	3	4.16667	5	-3.34	0.035437	-3.51	0.0298969	0.965776	0.029029	0.0280355		2	0.833333	2.5	3	4.16667	5	-0.547	0.578683	-0.728333	0.482713	0.649081	0.325561	0.211315	-0.183524
4	1.11111	3.33333	3	5.55556	5	-3.272	0.0379305	-3.49867	0.0302377	0.963456	0.0293502	0.0282776		3	1.11111	3.33333	3	5.55556	5	-0.479	0.619402	-0.717	0.488215	0.633439	0.328054	0.207802	-0.179767
5	1.38889	4.16667	3	6.94444	5	-3.204	0.0405995	-3.48733	0.0305823	0.960985	0.0296748	0.028517		4	1.38889	4.16667	3	6.94444	5	-0.411	0.662987	-0.705667	0.493779	0.617512	0.330557	0.204123	-0.175845
6	1.66667	5	3	8.33333	5	-3.136	0.0434563	-3.476	0.0309309	0.958354	0.0300029	0.0287534		5	1.66667	5	3	8.33333	5	-0.343	0.709638	-0.694333	0.499407	0.601328	0.33307	0.200284	-0.171767
7	1.94444	5.83333	3	9.72222	5	-3.068	0.0465141	-3.46467	0.0312834	0.955553	0.0303345	0.0289862		6	1.94444	5.83333	3	9.72222	5	-0.275	0.759572	-0.683	0.505099	0.584919	0.335592	0.196294	-0.167541
8	2.22222	6.66667	3	11.1111	5	-3	0.0497871	-3.45333	0.03164	0.952574	0.0306696	0.0292151		7	2.22222	6.66667	3	11.1111	5	-0.207	0.81302	-0.671667	0.510856	0.56832	0.338124	0.192162	-0.163176
9	2.5	7.5	3	12.5	5	-2.932	0.0532904	-3.442	0.0320006	0.949406	0.0310083	0.0294395		8	2.5	7.5	3	12.5	5	-0.139	0.870228	-0.660333	0.516679	0.551566	0.340665	0.187899	-0.158684
10	2.77778	8.33333	3	13.8889	5	-2.864	0.0570401	-3.43067	0.0323654	0.946038	0.0313507	0.0296589		9	2.77778	8.33333	3	13.8889	5	-0.071	0.931462	-0.649	0.522568	0.534694	0.343215	0.183515	-0.154076
11	3.05556	9.16667	3	15.2778	5	-2.796	0.0610538	-3.41933	0.0327343	0.942459	0.0316967	0.0298728		10	3.05556	9.16667	3	15.2778	5	-0.003	0.997004	-0.637667	0.528524	0.517743	0.345774	0.179022	-0.149363
12	3.33333	10	3	16.6667	5	-2.728	0.0653499	-3.408	0.0331073	0.938659	0.0320464	0.0300806		11	3.33333	10	3	16.6667	5	0.065	1.06716	-0.626333	0.534548	0.50075	0.348342	0.174432	-0.14456
13	3.61111	10.8333	3	18.0556	5	-2.66	0.0699482	-3.39667	0.0334847	0.934625	0.0323998	0.0302817		12	3.61111	10.8333	3	18.0556	5	0.133	1.14225	-0.615	0.540641	0.483756	0.350919	0.169759	-0.139679
14	3.88889	11.6667	3	19.4444	5	-2.592	0.0748701	-3.38533	0.0338664	0.930345	0.032757	0.0304753		13	3.88889	11.6667	3	19.4444	5	0.201	1.22262	-0.603667	0.546803	0.466799	0.353505	0.165016	-0.134734
15	4.16667	12.5	3	20.8333	5	-2.524	0.0801384	-3.374	0.0342524	0.925807	0.033118	0.0306609		14	4.16667	12.5	3	20.8333	5	0.269	1.30866	-0.592333	0.553035	0.449918	0.3561	0.160216	-0.129741
16	4.44444	13.3333	3	22.2222	5	-2.456	0.0857774	-3.36267	0.0346428	0.920999	0.0334828	0.0308376		15	4.44444	13.3333	3	22.2222	5	0.337	1.40074	-0.581	0.559339	0.433153	0.358703	0.155373	-0.124712
17	4.72222	14.1667	3	23.6111	5	-2.388	0.0918131	-3.35133	0.0350376	0.915908	0.0338515	0.0310049		16	4.72222	14.1667	3	23.6111	5	0.405	1.4993	-0.569667	0.565714	0.416538	0.361314	0.150501	-0.119663
18	5	15	3	25	5	-2.32	0.0982736	-3.34	0.035437	0.91052	0.0342242	0.0311618		17	5	15	3	25	5	0.473	1.6048	-0.558333	0.572162	0.400112	0.363933	0.145614	-0.114609
19	5.27778	15.8333	3	26.3889	5	-2.252	0.105189	-3.32867	0.0358409	0.904823	0.0346007	0.0313075		18	5.27778	15.8333	3	26.3889	5	0.541	1.71772	-0.547	0.578683	0.383906	0.366561	0.140725	-0.109563
20	5.55556	16.6667	3	27.7778	5	-2.184	0.11259	-3.31733	0.0362494	0.898803	0.0349813	0.0314413		19	5.55556	16.6667	3	27.7778	5	0.609	1.83859	-0.535667	0.585279	0.367955	0.369196	0.135848	-0.10454
21	5.83333	17.5	3	29.1667	5	-2.116	0.120513	-3.306	0.0366625	0.892449	0.0353659	0.0315623		20	5.83333	17.5	3	29.1667	5	0.677	1.96796	-0.524333	0.59195	0.352287	0.37184	0.130994	-0.099553
22	6.11111	18.3333	3	30.5556	5	-2.048	0.128993	-3.29467	0.0370804	0.885745	0.0357546	0.0316695		21	6.11111	18.3333	3	30.5556	5	0.745	2.10644	-0.513	0.598697	0.336931	0.374491	0.126178	-0.0946153
23	6.38889	19.1667	3	31.9444	5	-1.98	0.138069	-3.28333	0.037503	0.878681	0.0361474	0.031762		22	6.38889	19.1667	3	31.9444	5	0.813	2.25466	-0.501667	0.605521	0.321912	0.377149	0.121409	-0.0897392
24	6.66667	20	3	33.3333	5	-1.912	0.147785	-3.272	0.0379305	0.871244	0.0365443	0.031839		23	6.66667	20	3	33.3333	5	0.881	2.41331	-0.490333	0.612422	0.307252	0.379815	0.116699	-0.0849367
25	6.94444	20.8333	3	34.7222	5	-1.844	0.158183	-3.26067	0.0383628	0.863421	0.0369455	0.0318995		24	6.94444	20.8333	3	34.7222	5	0.949	2.58313	-0.479	0.619402	0.292971	0.382488	0.112058	-0.0802188
26	7.22222	21.6667	3	36.1111	5	-1.776	0.169314	-3.24933	0.0388001	0.855202	0.0373509	0.0319425		25	7.22222	21.6667	3	36.1111	5	1.017	2.76489	-0.467667	0.626462	0.279086	0.385169	0.107495	-0.0755957		T=1.0s
27	7.5	22.5	3	37.5	5	-1.708	0.181228	-3.238	0.0392423	0.846577	0.0377605	0.0319672		26	7.5	22.5	3	37.5	5	1.085	2.95944	-0.456333	0.633603	0.265612	0.387856	0.103019	-0.0710767
28	7.77778	23.3333	3	38.8889	5	-1.64	0.19398	-3.22667	0.0396896	0.837535	0.0381744	0.0319724		27	7.77778	23.3333	3	38.8889	5	1.153	3.16768	-0.445	0.640824	0.252561	0.39055	0.0986377	-0.0666706
29	8.05556	24.1667	3	40.2778	5	-1.572	0.20763	-3.21533	0.040142	0.828069	0.0385928	0.0319575		28	8.05556	24.1667	3	40.2778	5	1.221	3.39058	-0.433667	0.648128	0.239942	0.393251	0.0943573	-0.0623848
30	8.33333	25	3	41.6667	5	-1.504	0.222239	-3.204	0.0405995	0.81817	0.0390155	0.0319213		29	8.33333	25	3	41.6667	5	1.289	3.62916	-0.422333	0.655515	0.227761	0.395959	0.0901837	-0.0582263
31	8.61111	25.8333	3	43.0556	5	-1.436	0.237877	-3.19267	0.0410622	0.807834	0.0394426	0.0318631		30	8.61111	25.8333	3	43.0556	5	1.357	3.88452	-0.411	0.662987	0.216022	0.398672	0.086122	-0.0542007
32	8.88889	26.6667	3	44.4444	5	-1.368	0.254616	-3.18133	0.0415302	0.797057	0.0398743	0.031782		31	8.88889	26.6667	3	44.4444	5	1.425	4.15786	-0.399667	0.670544	0.204728	0.401392	0.0821764	-0.0503133
33	9.16667	27.5	3	45.8333	5	-1.3	0.272532	-3.17	0.0420036	0.785835	0.0403104	0.0316773		32	9.16667	27.5	3	45.8333	5	1.493	4.45043	-0.388333	0.678186	0.193879	0.404119	0.0783501	-0.046568
34	9.44444	28.3333	3	47.2222	5	-1.232	0.291709	-3.15867	0.0424823	0.774168	0.0407511	0.0315482		33	9.44444	28.3333	3	47.2222	5	1.561	4.76358	-0.377	0.685916	0.183472	0.406851	0.0746457	-0.0429683
35	9.72222	29.1667	3	48.6111	5	-1.164	0.312235	-3.14733	0.0429666	0.762059	0.0411965	0.0313941		34	9.72222	29.1667	3	48.6111	5	1.629	5.09877	-0.365667	0.693734	0.173503	0.409589	0.0710649	-0.0395167
36	10	30	3	50	5	-1.096	0.334205	-3.136	0.0434563	0.74951	0.0416465	0.0312144		35	10	30	3	50	5	1.697	5.45755	-0.354333	0.701641	0.163967	0.412332	0.067609	-0.0362149
37	10.2778	30.8333	3	51.3889	5	-1.028	0.357722	-3.12467	0.0439516	0.736528	0.0421012	0.0310087		36	10.2778	30.8333	3	51.3889	5	1.765	5.84157	-0.343	0.709638	0.154857	0.415081	0.0642784	-0.0330639
38	10.5556	31.6667	3	52.7778	5	-0.96	0.382893	-3.11333	0.0444525	0.723122	0.0425606	0.0307765		37	10.5556	31.6667	3	52.7778	5	1.833	6.25262	-0.331667	0.717727	0.146165	0.417835	0.061073	-0.0300643
39	10.8333	32.5	3	54.1667	5	-0.892	0.409835	-3.102	0.0449592	0.709303	0.0430248	0.0305176		38	10.8333	32.5	3	54.1667	5	1.901	6.69258	-0.320333	0.725907	0.137881	0.420595	0.0579921	-0.0272156
40	11.1111	33.3333	3	55.5556	5	-0.824	0.438673	-3.09067	0.0454716	0.695085	0.0434939	0.0302319		39	11.1111	33.3333	3	55.5556	5	1.969	7.16351	-0.309	0.734181	0.129995	0.423359	0.0550347	-0.024517
41	11.3889	34.1667	3	56.9444	5	-0.756	0.469541	-3.07933	0.0459899	0.680485	0.0439678	0.0299194		40	11.3889	34.1667	3	56.9444	5	2.037	7.66757	-0.297667	0.742549	0.122496	0.426128	0.0521991	-0.0219672
42	11.6667	35	3	58.3333	5	-0.688	0.50258	-3.068	0.0465141	0.665522	0.0444467	0.0295802		41	11.6667	35	3	58.3333	5	2.105	8.2071	-0.286333	0.751012	0.115373	0.428902	0.0494835	-0.0195641
43	11.9444	35.8333	3	59.7222	5	-0.62	0.537944	-3.05667	0.0470442	0.650219	0.0449305	0.0292147		42	11.9444	35.8333	3	59.7222	5	2.173	8.7846	-0.275	0.759572	0.108612	0.43168	0.0468855	-0.0173053
44	12.2222	36.6667	3	61.1111	5	-0.552	0.575797	-3.04533	0.0475804	0.634599	0.0454194	0.0288231		43	12.2222	36.6667	3	61.1111	5	2.241	9.40273	-0.263667	0.76823	0.102201	0.434463	0.0444027	-0.015188
45	12.5	37.5	3	62.5	5	-0.484	0.616313	-3.034	0.0481228	0.618692	0.0459133	0.0284062		44	12.5	37.5	3	62.5	5	2.309	10.0644	-0.252333	0.776986	0.0961286	0.437249	0.0420322	-0.0132091
46	12.7778	38.3333	3	63.8889	5	-0.416	0.65968	-3.02267	0.0486713	0.602526	0.0464123	0.0279646		45	12.7778	38.3333	3	63.8889	5	2.377	10.7725	-0.241	0.785842	0.0903803	0.44004	0.039771	-0.0113648
47	13.0556	39.1667	3	65.2778	5	-0.348	0.706099	-3.01133	0.049226	0.586133	0.0469165	0.0274993		46	13.0556	39.1667	3	65.2778	5	2.445	11.5305	-0.229667	0.794798	0.0849435	0.442834	0.0376159	-0.00965128
48	13.3333	40	3	66.6667	5	-0.28	0.755784	-3	0.0497871	0.569546	0.0474259	0.0270112		47	13.3333	40	3	66.6667	5	2.513	12.3419	-0.218333	0.803857	0.079805	0.445632	0.0355637	-0.0080644
49	13.6111	40.8333	3	68.0556	5	-0.212	0.808965	-2.98867	0.0503545	0.552802	0.0479405	0.0265016		48	13.6111	40.8333	3	68.0556	5	2.581	13.2103	-0.207	0.81302	0.0749518	0.448434	0.033611	-0.00659973
50	13.8889	41.6667	3	69.4444	5	-0.144	0.865888	-2.97733	0.0509285	0.535938	0.0484604	0.0259718		49	13.8889	41.6667	3	69.4444	5	2.649	14.1399	-0.195667	0.822286	0.0703713	0.451239	0.0317543	-0.00525263		T=2.0s
51	14.1667	42.5	3	70.8333	5	-0.076	0.926816	-2.966	0.0515089	0.518991	0.0489857	0.0254231		50	14.1667	42.5	3	70.8333	5	2.717	15.1348	-0.184333	0.831659	0.0660507	0.454047	0.0299901	-0.0040183
52	14.4444	43.3333	3	72.2222	5	-0.008	0.992032	-2.95467	0.052096	0.502	0.0495164	0.0248572		51	14.4444	43.3333	3	72.2222	5	2.785	16.1998	-0.173	0.841138	0.0619776	0.456858	0.028315	-0.00289181
53	14.7222	44.1667	3	73.6111	5	0.06	1.06184	-2.94333	0.0526898	0.485004	0.0500525	0.0242757		52	14.7222	44.1667	3	73.6111	5	2.853	17.3397	-0.161667	0.850725	0.0581402	0.459671	0.0267253	-0.00186811
54	15	45	3	75	5	0.128	1.13655	-2.932	0.0532904	0.468044	0.0505942	0.0236803		53	15	45	3	75	5	2.921	18.5598	-0.150333	0.860421	0.0545265	0.462487	0.0252178	-0.000942081
55	15.2778	45.8333	3	76.3889	5	0.196	1.21653	-2.92067	0.0538977	0.451156	0.0511413	0.0230727		54	15.2778	45.8333	3	76.3889	5	2.989	19.8658	-0.139	0.870228	0.0511252	0.465306	0.0237888	-0.000108561	54km/h
56	15.5556	46.6667	3	77.7778	5	0.264	1.30213	-2.90933	0.0545121	0.434381	0.0516941	0.0224549		55	15.5556	46.6667	3	77.7778	5	3.057	21.2637	-0.127667	0.880147	0.0479253	0.468127	0.0224351	0.000637629
57	15.8333	47.5	3	79.1667	5	0.332	1.39375	-2.898	0.0551334	0.417754	0.0522525	0.0218287		56	15.8333	47.5	3	79.1667	5	3.125	22.7599	-0.116333	0.890178	0.0449162	0.470949	0.0211533	0.00130165
58	16.1111	48.3333	3	80.5556	5	0.4	1.49182	-2.88667	0.0557618	0.401312	0.0528166	0.021196		57	16.1111	48.3333	3	80.5556	5	3.193	24.3614	-0.105	0.900325	0.0420877	0.473774	0.0199401	0.00188863
59	16.3889	49.1667	3	81.9444	5	0.468	1.5968	-2.87533	0.0563973	0.38509	0.0533865	0.0205586		58	16.3889	49.1667	3	81.9444	5	3.261	26.0756	-0.0936667	0.910586	0.03943	0.4766	0.0187924	0.00240361
60	16.6667	50	3	83.3333	5	0.536	1.70916	-2.864	0.0570401	0.369119	0.0539621	0.0199184		59	16.6667	50	3	83.3333	5	3.329	27.9104	-0.0823333	0.920965	0.0369336	0.479428	0.017707	0.00285156
61	16.9444	50.8333	3	84.7222	5	0.604	1.82942	-2.85267	0.0576903	0.353429	0.0545436	0.0192773		60	16.9444	50.8333	3	84.7222	5	3.397	29.8743	-0.071	0.931462	0.0345896	0.482257	0.0166811	0.00323733
62	17.2222	51.6667	3	86.1111	5	0.672	1.95815	-2.84133	0.0583478	0.338049	0.055131	0.018637		61	17.2222	51.6667	3	86.1111	5	3.465	31.9765	-0.0596667	0.942079	0.0323894	0.485088	0.0157117	0.00356563
63	17.5	52.5	3	87.5	5	0.74	2.09594	-2.83	0.0590129	0.323004	0.0557244	0.0179992		62	17.5	52.5	3	87.5	5	3.533	34.2265	-0.0483333	0.952816	0.0303247	0.487919	0.014796	0.00384102
64	17.7778	53.3333	3	88.8889	5	0.808	2.24342	-2.81867	0.0596855	0.308317	0.0563238	0.0173656		63	17.7778	53.3333	3	88.8889	5	3.601	36.6349	-0.037	0.963676	0.0283877	0.490751	0.0139313	0.00406791
65	18.0556	54.1667	3	90.2778	5	0.876	2.40128	-2.80733	0.0603658	0.294007	0.0569292	0.0167376		64	18.0556	54.1667	3	90.2778	5	3.669	39.2127	-0.0256667	0.97466	0.0265711	0.493584	0.0131151	0.00425049
66	18.3333	55	3	91.6667	5	0.944	2.57024	-2.796	0.0610538	0.280093	0.0575407	0.0161168		65	18.3333	55	3	91.6667	5	3.737	41.9719	-0.0143333	0.985769	0.0248678	0.496417	0.0123448	0.00439282
67	18.6111	55.8333	3	93.0556	5	1.012	2.7511	-2.78467	0.0617497	0.266589	0.0581584	0.0155044		66	18.6111	55.8333	3	93.0556	5	3.805	44.9253	-0.003	0.997004	0.023271	0.49925	0.0116181	0.00449869
68	18.8889	56.6667	3	94.4444	5	1.08	2.94468	-2.77333	0.0624535	0.253506	0.0587823	0.0149017		67	18.8889	56.6667	3	94.4444	5	3.873	48.0864	0.00833333	1.00837	0.0217745	0.502083	0.0109326	0.00457175
69	19.1667	57.5	3	95.8333	5	1.148	3.15188	-2.762	0.0631653	0.240855	0.0594125	0.0143098		68	19.1667	57.5	3	95.8333	5	3.941	51.47	0.0196667	1.01986	0.0203722	0.504917	0.0102863	0.0046154
70	19.4444	58.3333	3	97.2222	5	1.216	3.37367	-2.75067	0.0638853	0.228641	0.060049	0.0137297		69	19.4444	58.3333	3	97.2222	5	4.009	55.0918	0.031	1.03149	0.0190585	0.507749	0.00967694	0.00463284
71	19.7222	59.1667	3	98.6111	5	1.284	3.61106	-2.73933	0.0646134	0.21687	0.0606919	0.0131623		70	19.7222	59.1667	3	98.6111	5	4.077	58.9683	0.0423333	1.04324	0.0178279	0.510582	0.00910262	0.00462706
72	20	60	3	100	5	1.352	3.86515	-2.728	0.0653499	0.205544	0.0613412	0.0126083		71	20	60	3	100	5	4.145	63.1176	0.0536667	1.05513	0.0166755	0.513413	0.00856141	0.00460084
73	20.2778	60.8333	3	101.389	5	1.42	4.13712	-2.71667	0.0660947	0.194662	0.061997	0.0120684		72	20.2778	60.8333	3	101.389	5	4.213	67.5589	0.065	1.06716	0.0155963	0.516244	0.00805152	0.00455677
74	20.5556	61.6667	3	102.778	5	1.488	4.42823	-2.70533	0.066848	0.184222	0.0626594	0.0115432		73	20.5556	61.6667	3	102.778	5	4.281	72.3127	0.0763333	1.07932	0.014586	0.519074	0.00757121	0.00449723		T=4.0s
75	20.8333	62.5	3	104.167	5	1.556	4.73982	-2.694	0.06761	0.174221	0.0633283	0.0110331		74	20.8333	62.5	3	104.167	5	4.349	77.401	0.0876667	1.09162	0.0136402	0.521903	0.00711886	0.00442439
76	21.1111	63.3333	3	105.556	5	1.624	5.07334	-2.68267	0.0683806	0.164654	0.0640039	0.0105385		75	21.1111	63.3333	3	105.556	5	4.417	82.8474	0.099	1.10407	0.0127549	0.52473	0.00669289	0.00434025
77	21.3889	64.1667	3	106.944	5	1.692	5.43033	-2.67133	0.06916	0.155513	0.0646863	0.0100596		76	21.3889	64.1667	3	106.944	5	4.485	88.677	0.110333	1.11665	0.0119264	0.527555	0.00629185	0.00424665
78	21.6667	65	3	108.333	5	1.76	5.81244	-2.66	0.0699482	0.14679	0.0653753	0.00959647		77	21.6667	65	3	108.333	5	4.553	94.9167	0.121667	1.12938	0.0111511	0.530379	0.00591433	0.00414522
79	21.9444	65.8333	3	109.722	5	1.828	6.22143	-2.64867	0.0707455	0.138477	0.0660712	0.00914933		78	21.9444	65.8333	3	109.722	5	4.621	101.596	0.133	1.14225	0.0104257	0.533201	0.005559	0.00403747
80	22.2222	66.6667	3	111.111	5	1.896	6.6592	-2.63733	0.0715518	0.130562	0.066774	0.00871814		79	22.2222	66.6667	3	111.111	5	4.689	108.744	0.144333	1.15527	0.00974701	0.536021	0.0052246	0.00392473
81	22.5	67.5	3	112.5	5	1.964	7.12778	-2.626	0.0723674	0.123035	0.0674837	0.00830285		80	22.5	67.5	3	112.5	5	4.757	116.396	0.155667	1.16844	0.00911208	0.538838	0.00490994	0.0038082
82	22.7778	68.3333	3	113.889	5	2.032	7.62933	-2.61467	0.0731922	0.115884	0.0682004	0.00790333		81	22.7778	68.3333	3	113.889	5	4.825	124.586	0.167	1.18175	0.00851816	0.541653	0.00461389	0.00368896
83	23.0556	69.1667	3	115.278	5	2.1	8.16617	-2.60333	0.0740264	0.109097	0.0689242	0.00751941		82	23.0556	69.1667	3	115.278	5	4.893	133.353	0.178333	1.19522	0.00796264	0.544466	0.00433538	0.00356795
84	23.3333	70	3	116.667	5	2.168	8.74078	-2.592	0.0748701	0.102661	0.0696551	0.00715087		83	23.3333	70	3	116.667	5	4.961	142.736	0.189667	1.20885	0.00744308	0.547275	0.00407341	0.003446
85	23.6111	70.8333	3	118.056	5	2.236	9.35583	-2.58067	0.0757235	0.0965639	0.0703931	0.00679743		84	23.6111	70.8333	3	118.056	5	5.029	152.78	0.201	1.22262	0.00695718	0.550082	0.00382701	0.00332385
86	23.8889	71.6667	3	119.444	5	2.304	10.0142	-2.56933	0.0765866	0.0907922	0.0711383	0.00645881		85	23.8889	71.6667	3	119.444	5	5.097	163.531	0.212333	1.23656	0.00650279	0.552885	0.00359529	0.00320214
87	24.1667	72.5	3	120.833	5	2.372	10.7188	-2.558	0.0774595	0.0853329	0.0718909	0.00613466		86	24.1667	72.5	3	120.833	5	5.165	175.037	0.223667	1.25065	0.0060779	0.555685	0.00337739	0.00308141
88	24.4444	73.3333	3	122.222	5	2.44	11.473	-2.54667	0.0783424	0.0801729	0.0726507	0.00582462		87	24.4444	73.3333	3	122.222	5	5.233	187.354	0.235	1.26491	0.00568061	0.558481	0.00317251	0.00296214
89	24.7222	74.1667	3	123.611	5	2.508	12.2803	-2.53533	0.0792353	0.0752992	0.073418	0.00552832		88	24.7222	74.1667	3	123.611	5	5.301	200.537	0.246333	1.27933	0.00530915	0.561274	0.00297989	0.00284473
90	25	75	3	125	5	2.576	13.1445	-2.524	0.0801384	0.0706991	0.0741927	0.00524536		89	25	75	3	125	5	5.369	214.648	0.257667	1.29391	0.00496186	0.564063	0.0027988	0.00272952
91	25.2778	75.8333	3	126.389	5	2.644	14.0694	-2.51267	0.0810518	0.0663598	0.074975	0.00497532		90	25.2778	75.8333	3	126.389	5	5.437	229.752	0.269	1.30866	0.00463718	0.566847	0.00262858	0.00261678
92	25.5556	76.6667	3	127.778	5	2.712	15.0594	-2.50133	0.0819756	0.062269	0.0757648	0.00471779		91	25.5556	76.6667	3	127.778	5	5.505	245.918	0.280333	1.32357	0.00433366	0.569628	0.00246857	0.00250675
93	25.8333	77.5	3	129.167	5	2.78	16.119	-2.49	0.08291	0.0584146	0.0765622	0.00447235		92	25.8333	77.5	3	129.167	5	5.573	263.223	0.291667	1.33866	0.00404992	0.572404	0.00231819	0.0023996
94	26.1111	78.3333	3	130.556	5	2.848	17.2532	-2.47867	0.083855	0.0547848	0.0773673	0.00423855		93	26.1111	78.3333	3	130.556	5	5.641	281.744	0.303	1.35391	0.00378469	0.575176	0.00217686	0.00229549
95	26.3889	79.1667	3	131.944	5	2.916	18.4673	-2.46733	0.0848107	0.0513683	0.0781802	0.00401598		94	26.3889	79.1667	3	131.944	5	5.709	301.569	0.314333	1.36935	0.00353676	0.577943	0.00204405	0.00219451
96	26.6667	80	3	133.333	5	2.984	19.7667	-2.456	0.0857774	0.048154	0.0790009	0.00380421		95	26.6667	80	3	133.333	5	5.777	322.789	0.325667	1.38495	0.00330503	0.580705	0.00191924	0.00209674
97	26.9444	80.8333	3	134.722	5	3.052	21.1576	-2.44467	0.086755	0.0451312	0.0798294	0.0036028		96	26.9444	80.8333	3	134.722	5	5.845	345.503	0.337	1.40074	0.00308843	0.583462	0.00180198	0.00200223
98	27.2222	81.6667	3	136.111	5	3.12	22.6464	-2.43333	0.0877439	0.0422898	0.0806659	0.00341134		97	27.2222	81.6667	3	136.111	5	5.913	369.814	0.348333	1.4167	0.00288598	0.586213	0.0016918	0.001911
99	27.5	82.5	3	137.5	5	3.188	24.2399	-2.422	0.088744	0.0396198	0.0815104	0.00322943		98	27.5	82.5	3	137.5	5	5.981	395.836	0.359667	1.43285	0.00269677	0.58896	0.00158829	0.00182305
100	27.7778	83.3333	3	138.889	5	3.256	25.9455	-2.41067	0.0897554	0.0371119	0.0823629	0.00305664		99	27.7778	83.3333	3	138.889	5	6.049	423.689	0.371	1.44918	0.00251993	0.591701	0.00149105	0.00173838
														100								0.382333	1.4657	0.00235466	0.594436	0.0013997	0.00165695
Front vehicle to stop line=3.0s；H=0.5s
黄灯启亮时的速度_decision speed（km/h）	decision speed(m/s)	Estimated Distance to Stop Line_leading	Front vehicle to stop line	Estimated Distance to Stop Line_following	Following vehicle to Stop Line_following	logit（p）_leading	EXP_leading	logit（p）_following	EXP_following	P(stop)_leading	P(cross)_following	Probablity(rear-end)		黄灯启亮时的速度_decision speed（km/h）	decision speed(m/s)	Estimated Distance to Stop Line	Front vehicle to stop line	Estimated Distance to Stop Line_following	Following vehicle to Stop Line_following	logit（p）_leading	EXP_leading	logit（p）_following	EXP_following	P(stop)_leading	P(cross)_following	Probablity(rear-end)	Increased Crash Probability
1	0.277778	0.833333	3	0.972222	3.5	-3.476	0.0309309	-3.49017	0.0304958	0.969997	0.0295933	0.0287054		1	0.277778	0.833333	3	0.972222	3.5	-0.683	0.505099	-0.697167	0.497994	0.664408	0.332441	0.220876	-0.192171
2	0.555556	1.66667	3	1.94444	3.5	-3.408	0.0331073	-3.43633	0.0321825	0.967954	0.0311791	0.0301799		2	0.555556	1.66667	3	1.94444	3.5	-0.615	0.540641	-0.643333	0.525538	0.649081	0.344493	0.223604	-0.193424
3	0.833333	2.5	3	2.91667	3.5	-3.34	0.035437	-3.3825	0.0339624	0.965776	0.0328469	0.0317227		3	0.833333	2.5	3	2.91667	3.5	-0.547	0.578683	-0.5895	0.554605	0.633439	0.35675	0.225979	-0.194256
4	1.11111	3.33333	3	3.88889	3.5	-3.272	0.0379305	-3.32867	0.0358409	0.963456	0.0346007	0.0333363		4	1.11111	3.33333	3	3.88889	3.5	-0.479	0.619402	-0.535667	0.585279	0.617512	0.369196	0.227983	-0.194647
5	1.38889	4.16667	3	4.86111	3.5	-3.204	0.0405995	-3.27483	0.0378232	0.960985	0.0364447	0.0350228		5	1.38889	4.16667	3	4.86111	3.5	-0.411	0.662987	-0.481833	0.61765	0.601328	0.381819	0.229598	-0.194576
6	1.66667	5	3	5.83333	3.5	-3.136	0.0434563	-3.221	0.0399151	0.958354	0.0383831	0.0367845		6	1.66667	5	3	5.83333	3.5	-0.343	0.709638	-0.428	0.651811	0.584919	0.394604	0.230811	-0.194027
7	1.94444	5.83333	3	6.80556	3.5	-3.068	0.0465141	-3.16717	0.0421228	0.955553	0.0404202	0.0386236		7	1.94444	5.83333	3	6.80556	3.5	-0.275	0.759572	-0.374167	0.687862	0.56832	0.407535	0.23161	-0.192986
8	2.22222	6.66667	3	7.77778	3.5	-3	0.0497871	-3.11333	0.0444525	0.952574	0.0425606	0.0405421		8	2.22222	6.66667	3	7.77778	3.5	-0.207	0.81302	-0.320333	0.725907	0.551566	0.420595	0.231986	-0.191444
9	2.5	7.5	3	8.75	3.5	-2.932	0.0532904	-3.0595	0.0469111	0.949406	0.0448091	0.042542		9	2.5	7.5	3	8.75	3.5	-0.139	0.870228	-0.2665	0.766056	0.534694	0.433767	0.231932	-0.18939
10	2.77778	8.33333	3	9.72222	3.5	-2.864	0.0570401	-3.00567	0.0495057	0.946038	0.0471705	0.0446251		10	2.77778	8.33333	3	9.72222	3.5	-0.071	0.931462	-0.212667	0.808426	0.517743	0.447033	0.231448	-0.186823
11	3.05556	9.16667	3	10.6944	3.5	-2.796	0.0610538	-2.95183	0.0522438	0.942459	0.0496499	0.046793		11	3.05556	9.16667	3	10.6944	3.5	-0.003	0.997004	-0.158833	0.853139	0.50075	0.460375	0.230533	-0.18374
12	3.33333	10	3	11.6667	3.5	-2.728	0.0653499	-2.898	0.0551334	0.938659	0.0522525	0.0490473		12	3.33333	10	3	11.6667	3.5	0.065	1.06716	-0.105	0.900325	0.483756	0.473774	0.229191	-0.180144
13	3.61111	10.8333	3	12.6389	3.5	-2.66	0.0699482	-2.84417	0.0581827	0.934625	0.0549836	0.0513891		13	3.61111	10.8333	3	12.6389	3.5	0.133	1.14225	-0.0511667	0.95012	0.466799	0.487211	0.22743	-0.176041
14	3.88889	11.6667	3	13.6111	3.5	-2.592	0.0748701	-2.79033	0.0614007	0.930345	0.0578488	0.0538193		14	3.88889	11.6667	3	13.6111	3.5	0.201	1.22262	0.00266667	1.00267	0.449918	0.500667	0.225259	-0.17144
15	4.16667	12.5	3	14.5833	3.5	-2.524	0.0801384	-2.7365	0.0647967	0.925807	0.0608536	0.0563387		15	4.16667	12.5	3	14.5833	3.5	0.269	1.30866	0.0565	1.05813	0.433153	0.514121	0.222693	-0.166354
16	4.44444	13.3333	3	15.5556	3.5	-2.456	0.0857774	-2.68267	0.0683806	0.920999	0.0640039	0.0589476		16	4.44444	13.3333	3	15.5556	3.5	0.337	1.40074	0.110333	1.11665	0.416538	0.527555	0.219747	-0.1608
17	4.72222	14.1667	3	16.5278	3.5	-2.388	0.0918131	-2.62883	0.0721626	0.915908	0.0673057	0.0616458		17	4.72222	14.1667	3	16.5278	3.5	0.405	1.4993	0.164167	1.17841	0.400112	0.54095	0.21644	-0.154795
18	5	15	3	17.5	3.5	-2.32	0.0982736	-2.575	0.0761538	0.91052	0.0707648	0.0644328		18	5	15	3	17.5	3.5	0.473	1.6048	0.218	1.24359	0.383906	0.554285	0.212794	-0.148361
19	5.27778	15.8333	3	18.4722	3.5	-2.252	0.105189	-2.52117	0.0803658	0.904823	0.0743876	0.0673076		19	5.27778	15.8333	3	18.4722	3.5	0.541	1.71772	0.271833	1.31237	0.367955	0.567543	0.20883	-0.141523
20	5.55556	16.6667	3	19.4444	3.5	-2.184	0.11259	-2.46733	0.0848107	0.898803	0.0781802	0.0702686		20	5.55556	16.6667	3	19.4444	3.5	0.609	1.83859	0.325667	1.38495	0.352287	0.580705	0.204575	-0.134306
21	5.83333	17.5	3	20.4167	3.5	-2.116	0.120513	-2.4135	0.0895015	0.892449	0.082149	0.0733138		21	5.83333	17.5	3	20.4167	3.5	0.677	1.96796	0.3795	1.46155	0.336931	0.593753	0.200054	-0.12674
22	6.11111	18.3333	3	21.3889	3.5	-2.048	0.128993	-2.35967	0.0944517	0.885745	0.0863005	0.0764402		22	6.11111	18.3333	3	21.3889	3.5	0.745	2.10644	0.433333	1.54239	0.321912	0.606669	0.195294	-0.118854
23	6.38889	19.1667	3	22.3611	3.5	-1.98	0.138069	-2.30583	0.0996757	0.878681	0.090641	0.0796445		23	6.38889	19.1667	3	22.3611	3.5	0.813	2.25466	0.487167	1.6277	0.307252	0.619439	0.190324	-0.110679
24	6.66667	20	3	23.3333	3.5	-1.912	0.147785	-2.252	0.105189	0.871244	0.0951771	0.0829224		24	6.66667	20	3	23.3333	3.5	0.881	2.41331	0.541	1.71772	0.292971	0.632045	0.185171	-0.102248
25	6.94444	20.8333	3	24.3056	3.5	-1.844	0.158183	-2.19817	0.111006	0.863421	0.0999152	0.0862689		25	6.94444	20.8333	3	24.3056	3.5	0.949	2.58313	0.594833	1.81273	0.279086	0.644473	0.179863	-0.0935945
26	7.22222	21.6667	3	25.2778	3.5	-1.776	0.169314	-2.14433	0.117146	0.855202	0.104862	0.0896782		26	7.22222	21.6667	3	25.2778	3.5	1.017	2.76489	0.648667	1.91299	0.265612	0.65671	0.17443	-0.084752
27	7.5	22.5	3	26.25	3.5	-1.708	0.181228	-2.0905	0.123625	0.846577	0.110024	0.0931434		27	7.5	22.5	3	26.25	3.5	1.085	2.95944	0.7025	2.01879	0.252561	0.668742	0.168898	-0.0757547
28	7.77778	23.3333	3	27.2222	3.5	-1.64	0.19398	-2.03667	0.130463	0.837535	0.115407	0.0966571		28	7.77778	23.3333	3	27.2222	3.5	1.153	3.16768	0.756333	2.13045	0.239942	0.680557	0.163294	-0.0666369
29	8.05556	24.1667	3	28.1944	3.5	-1.572	0.20763	-1.98283	0.137679	0.828069	0.121017	0.10021		29	8.05556	24.1667	3	28.1944	3.5	1.221	3.39058	0.810167	2.24828	0.227761	0.692145	0.157643	-0.0574328
30	8.33333	25	3	29.1667	3.5	-1.504	0.222239	-1.929	0.145293	0.81817	0.126861	0.103794		30	8.33333	25	3	29.1667	3.5	1.289	3.62916	0.864	2.37263	0.216022	0.703496	0.151971	-0.0481765
31	8.61111	25.8333	3	30.1389	3.5	-1.436	0.237877	-1.87517	0.153329	0.807834	0.132945	0.107398		31	8.61111	25.8333	3	30.1389	3.5	1.357	3.88452	0.917833	2.50386	0.204728	0.7146	0.146299	-0.0389014
32	8.88889	26.6667	3	31.1111	3.5	-1.368	0.254616	-1.82133	0.16181	0.797057	0.139274	0.111009		32	8.88889	26.6667	3	31.1111	3.5	1.425	4.15786	0.971667	2.64234	0.193879	0.725452	0.14065	-0.0296405
33	9.16667	27.5	3	32.0833	3.5	-1.3	0.272532	-1.7675	0.170759	0.785835	0.145854	0.114617		33	9.16667	27.5	3	32.0833	3.5	1.493	4.45043	1.0255	2.78849	0.183472	0.736043	0.135043	-0.0204263
34	9.44444	28.3333	3	33.0556	3.5	-1.232	0.291709	-1.71367	0.180204	0.774168	0.152689	0.118207		34	9.44444	28.3333	3	33.0556	3.5	1.561	4.76358	1.07933	2.94272	0.173503	0.746368	0.129497	-0.0112904
35	9.72222	29.1667	3	34.0278	3.5	-1.164	0.312235	-1.65983	0.190171	0.762059	0.159784	0.121765		35	9.72222	29.1667	3	34.0278	3.5	1.629	5.09877	1.13317	3.10547	0.163967	0.756423	0.124029	-0.0022636
36	10	30	3	35	3.5	-1.096	0.334205	-1.606	0.200689	0.74951	0.167145	0.125277		36	10	30	3	35	3.5	1.697	5.45755	1.187	3.27723	0.154857	0.766204	0.118652	0.00662416	36km/h
37	10.2778	30.8333	3	35.9722	3.5	-1.028	0.357722	-1.55217	0.211789	0.736528	0.174774	0.128726		37	10.2778	30.8333	3	35.9722	3.5	1.765	5.84157	1.24083	3.45849	0.146165	0.775709	0.113382	0.0153439
38	10.5556	31.6667	3	36.9444	3.5	-0.96	0.382893	-1.49833	0.223502	0.723122	0.182674	0.132096		38	10.5556	31.6667	3	36.9444	3.5	1.833	6.25262	1.29467	3.64978	0.137881	0.784936	0.108228	0.0238677
39	10.8333	32.5	3	37.9167	3.5	-0.892	0.409835	-1.4445	0.235864	0.709303	0.190849	0.13537		39	10.8333	32.5	3	37.9167	3.5	1.901	6.69258	1.3485	3.85164	0.129995	0.793884	0.103201	0.0321688
40	11.1111	33.3333	3	38.8889	3.5	-0.824	0.438673	-1.39067	0.248909	0.695085	0.199301	0.138531		40	11.1111	33.3333	3	38.8889	3.5	1.969	7.16351	1.40233	4.06467	0.122496	0.802554	0.0983099	0.0402214
41	11.3889	34.1667	3	39.8611	3.5	-0.756	0.469541	-1.33683	0.262676	0.680485	0.208031	0.141562		41	11.3889	34.1667	3	39.8611	3.5	2.037	7.66757	1.45617	4.28948	0.115373	0.810946	0.0935609	0.0480012
42	11.6667	35	3	40.8333	3.5	-0.688	0.50258	-1.283	0.277204	0.665522	0.21704	0.144445		42	11.6667	35	3	40.8333	3.5	2.105	8.2071	1.51	4.52673	0.108612	0.819061	0.0889597	0.0554852
43	11.9444	35.8333	3	41.8056	3.5	-0.62	0.537944	-1.22917	0.292536	0.650219	0.226327	0.147162		43	11.9444	35.8333	3	41.8056	3.5	2.173	8.7846	1.56383	4.7771	0.102201	0.826903	0.0845106	0.0626516
44	12.2222	36.6667	3	42.7778	3.5	-0.552	0.575797	-1.17533	0.308716	0.634599	0.235892	0.149697		44	12.2222	36.6667	3	42.7778	3.5	2.241	9.40273	1.61767	5.04131	0.0961286	0.834473	0.0802167	0.0694804
45	12.5	37.5	3	43.75	3.5	-0.484	0.616313	-1.1215	0.325791	0.618692	0.245733	0.152033		45	12.5	37.5	3	43.75	3.5	2.309	10.0644	1.6715	5.32014	0.0903803	0.841776	0.07608	0.0759532
46	12.7778	38.3333	3	44.7222	3.5	-0.416	0.65968	-1.06767	0.34381	0.602526	0.255847	0.154154		46	12.7778	38.3333	3	44.7222	3.5	2.377	10.7725	1.72533	5.61439	0.0849435	0.848815	0.0721012	0.0820532
47	13.0556	39.1667	3	45.6944	3.5	-0.348	0.706099	-1.01383	0.362825	0.586133	0.26623	0.156046		47	13.0556	39.1667	3	45.6944	3.5	2.445	11.5305	1.77917	5.92492	0.079805	0.855594	0.0682806	0.0877656
48	13.3333	40	3	46.6667	3.5	-0.28	0.755784	-0.96	0.382893	0.569546	0.276878	0.157695		48	13.3333	40	3	46.6667	3.5	2.513	12.3419	1.833	6.25262	0.0749518	0.862119	0.0646174	0.0930775
49	13.6111	40.8333	3	47.6389	3.5	-0.212	0.808965	-0.906167	0.40407	0.552802	0.287785	0.159088		49	13.6111	40.8333	3	47.6389	3.5	2.581	13.2103	1.88683	6.59844	0.0703713	0.868394	0.06111	0.0979782
50	13.8889	41.6667	3	48.6111	3.5	-0.144	0.865888	-0.852333	0.426419	0.535938	0.298944	0.160215		50	13.8889	41.6667	3	48.6111	3.5	2.649	14.1399	1.94067	6.96339	0.0660507	0.874425	0.0577564	0.102459
51	14.1667	42.5	3	49.5833	3.5	-0.076	0.926816	-0.7985	0.450003	0.518991	0.310346	0.161067		51	14.1667	42.5	3	49.5833	3.5	2.717	15.1348	1.9945	7.34853	0.0619776	0.880218	0.0545539	0.106513
52	14.4444	43.3333	3	50.5556	3.5	-0.008	0.992032	-0.744667	0.474893	0.502	0.321985	0.161636		52	14.4444	43.3333	3	50.5556	3.5	2.785	16.1998	2.04833	7.75497	0.0581402	0.885779	0.0514993	0.110137
53	14.7222	44.1667	3	51.5278	3.5	0.06	1.06184	-0.690833	0.501158	0.485004	0.333848	0.161918		53	14.7222	44.1667	3	51.5278	3.5	2.853	17.3397	2.10217	8.18388	0.0545265	0.891114	0.0485893	0.113328
54	15	45	3	52.5	3.5	0.128	1.13655	-0.637	0.528877	0.468044	0.345925	0.161908		54	15	45	3	52.5	3.5	2.921	18.5598	2.156	8.63652	0.0511252	0.896228	0.0458198	0.116088
55	15.2778	45.8333	3	53.4722	3.5	0.196	1.21653	-0.583167	0.558128	0.451156	0.358204	0.161606		55	15.2778	45.8333	3	53.4722	3.5	2.989	19.8658	2.20983	9.1142	0.0479253	0.901129	0.0431869	0.118419
56	15.5556	46.6667	3	54.4444	3.5	0.264	1.30213	-0.529333	0.588998	0.434381	0.370672	0.161013		56	15.5556	46.6667	3	54.4444	3.5	3.057	21.2637	2.26367	9.61829	0.0449162	0.905823	0.0406861	0.120327
57	15.8333	47.5	3	55.4167	3.5	0.332	1.39375	-0.4755	0.621574	0.417754	0.383315	0.160132		57	15.8333	47.5	3	55.4167	3.5	3.125	22.7599	2.3175	10.1503	0.0420877	0.910316	0.0383131	0.121818
58	16.1111	48.3333	3	56.3889	3.5	0.4	1.49182	-0.421667	0.655953	0.401312	0.396118	0.158967		58	16.1111	48.3333	3	56.3889	3.5	3.193	24.3614	2.37133	10.7117	0.03943	0.914615	0.0360633	0.122904
59	16.3889	49.1667	3	57.3611	3.5	0.468	1.5968	-0.367833	0.692233	0.38509	0.409065	0.157527		59	16.3889	49.1667	3	57.3611	3.5	3.261	26.0756	2.42517	11.3041	0.0369336	0.918726	0.0339319	0.123595
60	16.6667	50	3	58.3333	3.5	0.536	1.70916	-0.314	0.730519	0.369119	0.422139	0.155819		60	16.6667	50	3	58.3333	3.5	3.329	27.9104	2.479	11.9293	0.0345896	0.922656	0.0319143	0.123905
61	16.9444	50.8333	3	59.3056	3.5	0.604	1.82942	-0.260167	0.770923	0.353429	0.435323	0.153856		61	16.9444	50.8333	3	59.3056	3.5	3.397	29.8743	2.53283	12.5891	0.0323894	0.926412	0.0300059	0.12385
62	17.2222	51.6667	3	60.2778	3.5	0.672	1.95815	-0.206333	0.813562	0.338049	0.448599	0.151648		62	17.2222	51.6667	3	60.2778	3.5	3.465	31.9765	2.58667	13.2854	0.0303247	0.929999	0.0282019	0.123447
63	17.5	52.5	3	61.25	3.5	0.74	2.09594	-0.1525	0.858559	0.323004	0.461949	0.149211		63	17.5	52.5	3	61.25	3.5	3.533	34.2265	2.6405	14.0202	0.0283877	0.933423	0.0264978	0.122714
64	17.7778	53.3333	3	62.2222	3.5	0.808	2.24342	-0.0986667	0.906045	0.308317	0.475353	0.146559		64	17.7778	53.3333	3	62.2222	3.5	3.601	36.6349	2.69433	14.7957	0.0265711	0.936691	0.0248889	0.121671
65	18.0556	54.1667	3	63.1944	3.5	0.876	2.40128	-0.0448333	0.956157	0.294007	0.488794	0.143709		65	18.0556	54.1667	3	63.1944	3.5	3.669	39.2127	2.74817	15.614	0.0248678	0.93981	0.023371	0.120338
66	18.3333	55	3	64.1667	3.5	0.944	2.57024	0.009	1.00904	0.280093	0.50225	0.140677		66	18.3333	55	3	64.1667	3.5	3.737	41.9719	2.802	16.4776	0.023271	0.942784	0.0219395	0.118737
67	18.6111	55.8333	3	65.1389	3.5	1.012	2.7511	0.0628333	1.06485	0.266589	0.515703	0.137481		67	18.6111	55.8333	3	65.1389	3.5	3.805	44.9253	2.85583	17.3889	0.0217745	0.945619	0.0205904	0.11689
68	18.8889	56.6667	3	66.1111	3.5	1.08	2.94468	0.116667	1.12374	0.253506	0.529134	0.134139		68	18.8889	56.6667	3	66.1111	3.5	3.873	48.0864	2.90967	18.3507	0.0203722	0.948322	0.0193194	0.114819
69	19.1667	57.5	3	67.0833	3.5	1.148	3.15188	0.1705	1.1859	0.240855	0.542522	0.130669		69	19.1667	57.5	3	67.0833	3.5	3.941	51.47	2.9635	19.3656	0.0190585	0.950898	0.0181227	0.112546
70	19.4444	58.3333	3	68.0556	3.5	1.216	3.37367	0.224333	1.25149	0.228641	0.555849	0.12709		70	19.4444	58.3333	3	68.0556	3.5	4.009	55.0918	3.01733	20.4367	0.0178279	0.953351	0.0169963	0.110094
71	19.7222	59.1667	3	69.0278	3.5	1.284	3.61106	0.278167	1.32071	0.21687	0.569097	0.12342		71	19.7222	59.1667	3	69.0278	3.5	4.077	58.9683	3.07117	21.567	0.0166755	0.955688	0.0159365	0.107484
72	20	60	3	70	3.5	1.352	3.86515	0.332	1.39375	0.205544	0.582246	0.119677		72	20	60	3	70	3.5	4.145	63.1176	3.125	22.7599	0.0155963	0.957912	0.0149399	0.104737
73	20.2778	60.8333	3	70.9722	3.5	1.42	4.13712	0.385833	1.47084	0.194662	0.595279	0.115878		73	20.2778	60.8333	3	70.9722	3.5	4.213	67.5589	3.17883	24.0187	0.014586	0.96003	0.014003	0.101875
74	20.5556	61.6667	3	71.9444	3.5	1.488	4.42823	0.439667	1.55219	0.184222	0.60818	0.11204		74	20.5556	61.6667	3	71.9444	3.5	4.281	72.3127	3.23267	25.3472	0.0136402	0.962045	0.0131225	0.0989176
75	20.8333	62.5	3	72.9167	3.5	1.556	4.73982	0.4935	1.63804	0.174221	0.620931	0.108179		75	20.8333	62.5	3	72.9167	3.5	4.349	77.401	3.2865	26.7491	0.0127549	0.963963	0.0122953	0.0958841
76	21.1111	63.3333	3	73.8889	3.5	1.624	5.07334	0.547333	1.72864	0.164654	0.633517	0.104311		76	21.1111	63.3333	3	73.8889	3.5	4.417	82.8474	3.34033	28.2285	0.0119264	0.965787	0.0115184	0.0927926
77	21.3889	64.1667	3	74.8611	3.5	1.692	5.43033	0.601167	1.82425	0.155513	0.645923	0.100449		77	21.3889	64.1667	3	74.8611	3.5	4.485	88.677	3.39417	29.7898	0.0111511	0.967522	0.010789	0.0896605
78	21.6667	65	3	75.8333	3.5	1.76	5.81244	0.655	1.92514	0.14679	0.658136	0.0966081		78	21.6667	65	3	75.8333	3.5	4.553	94.9167	3.448	31.4375	0.0104257	0.969171	0.0101043	0.0865038
79	21.9444	65.8333	3	76.8056	3.5	1.828	6.22143	0.708833	2.03162	0.138477	0.670143	0.0927992		79	21.9444	65.8333	3	76.8056	3.5	4.621	101.596	3.50183	33.1762	0.00974701	0.97074	0.00946181	0.0833374
80	22.2222	66.6667	3	77.7778	3.5	1.896	6.6592	0.762667	2.14399	0.130562	0.681932	0.0890344		80	22.2222	66.6667	3	77.7778	3.5	4.689	108.744	3.55567	35.0112	0.00911208	0.972231	0.00885905	0.0801753
81	22.5	67.5	3	78.75	3.5	1.964	7.12778	0.8165	2.26257	0.123035	0.693493	0.0853238		81	22.5	67.5	3	78.75	3.5	4.757	116.396	3.6095	36.9476	0.00851816	0.973648	0.00829369	0.0770301
82	22.7778	68.3333	3	79.7222	3.5	2.032	7.62933	0.870333	2.38771	0.115884	0.704815	0.0816767		82	22.7778	68.3333	3	79.7222	3.5	4.825	124.586	3.66333	38.9911	0.00796264	0.974994	0.00776353	0.0739132
83	23.0556	69.1667	3	80.6944	3.5	2.1	8.16617	0.924167	2.51977	0.109097	0.71589	0.0781014		83	23.0556	69.1667	3	80.6944	3.5	4.893	133.353	3.71717	41.1476	0.00744308	0.976274	0.00726648	0.0708349
84	23.3333	70	3	81.6667	3.5	2.168	8.74078	0.978	2.65913	0.102661	0.726711	0.074605		84	23.3333	70	3	81.6667	3.5	4.961	142.736	3.771	43.4235	0.00695718	0.977489	0.00680057	0.0678044
85	23.6111	70.8333	3	82.6389	3.5	2.236	9.35583	1.03183	2.80621	0.0965639	0.737271	0.0711938		85	23.6111	70.8333	3	82.6389	3.5	5.029	152.78	3.82483	45.8252	0.00650279	0.978644	0.00636392	0.0648299
86	23.8889	71.6667	3	83.6111	3.5	2.304	10.0142	1.08567	2.96141	0.0907922	0.747565	0.0678731		86	23.8889	71.6667	3	83.6111	3.5	5.097	163.531	3.87867	48.3597	0.0060779	0.979741	0.00595476	0.0619183
87	24.1667	72.5	3	84.5833	3.5	2.372	10.7188	1.1395	3.12521	0.0853329	0.757588	0.0646472		87	24.1667	72.5	3	84.5833	3.5	5.165	175.037	3.9325	51.0344	0.00568061	0.980782	0.00557144	0.0590757
88	24.4444	73.3333	3	85.5556	3.5	2.44	11.473	1.19333	3.29806	0.0801729	0.767337	0.0615196		88	24.4444	73.3333	3	85.5556	3.5	5.233	187.354	3.98633	53.8571	0.00530915	0.981771	0.00521237	0.0563072
89	24.7222	74.1667	3	86.5278	3.5	2.508	12.2803	1.24717	3.48047	0.0752992	0.776809	0.0584931		89	24.7222	74.1667	3	86.5278	3.5	5.301	200.537	4.04017	56.8358	0.00496186	0.98271	0.00487607	0.0536171
90	25	75	3	87.5	3.5	2.576	13.1445	1.301	3.67297	0.0706991	0.786003	0.0555697		90	25	75	3	87.5	3.5	5.369	214.648	4.094	59.9793	0.00463718	0.983601	0.00456114	0.0510086
91	25.2778	75.8333	3	88.4722	3.5	2.644	14.0694	1.35483	3.87611	0.0663598	0.794919	0.0527506		91	25.2778	75.8333	3	88.4722	3.5	5.437	229.752	4.14783	63.2967	0.00433366	0.984447	0.00426626	0.0484844
92	25.5556	76.6667	3	89.4444	3.5	2.712	15.0594	1.40867	4.0905	0.062269	0.803556	0.0500366		92	25.5556	76.6667	3	89.4444	3.5	5.505	245.918	4.20167	66.7976	0.00404992	0.98525	0.00399018	0.0460464
93	25.8333	77.5	3	90.4167	3.5	2.78	16.119	1.4625	4.31674	0.0584146	0.811915	0.0474276		93	25.8333	77.5	3	90.4167	3.5	5.573	263.223	4.2555	70.4921	0.00378469	0.986012	0.00373175	0.0436959
94	26.1111	78.3333	3	91.3889	3.5	2.848	17.2532	1.51633	4.55549	0.0547848	0.819998	0.0449234		94	26.1111	78.3333	3	91.3889	3.5	5.641	281.744	4.30933	74.3909	0.00353676	0.986736	0.00348985	0.0414336
95	26.3889	79.1667	3	92.3611	3.5	2.916	18.4673	1.57017	4.80745	0.0513683	0.827807	0.042523		95	26.3889	79.1667	3	92.3611	3.5	5.709	301.569	4.36317	78.5053	0.00330503	0.987422	0.00326346	0.0392596
96	26.6667	80	3	93.3333	3.5	2.984	19.7667	1.624	5.07334	0.048154	0.835346	0.0402252		96	26.6667	80	3	93.3333	3.5	5.777	322.789	4.417	82.8474	0.00308843	0.988074	0.00305159	0.0371736
97	26.9444	80.8333	3	94.3056	3.5	3.052	21.1576	1.67783	5.35394	0.0451312	0.842617	0.0380283		97	26.9444	80.8333	3	94.3056	3.5	5.845	345.503	4.47083	87.4296	0.00288598	0.988692	0.00285335	0.035175
98	27.2222	81.6667	3	95.2778	3.5	3.12	22.6464	1.73167	5.65006	0.0422898	0.849625	0.0359305		98	27.2222	81.6667	3	95.2778	3.5	5.913	369.814	4.52467	92.2652	0.00269677	0.989278	0.00266786	0.0332626
99	27.5	82.5	3	96.25	3.5	3.188	24.2399	1.7855	5.96256	0.0396198	0.856375	0.0339294		99	27.5	82.5	3	96.25	3.5	5.981	395.836	4.5785	97.3682	0.00251993	0.989834	0.00249432	0.0314351
100	27.7778	83.3333	3	97.2222	3.5	3.256	25.9455	1.83933	6.29234	0.0371119	0.86287	0.0320227		100	27.7778	83.3333	3	97.2222	3.5	6.049	423.689	4.63233	102.754	0.00235466	0.990362	0.00233197	0.0296908
Front vehicle to stop line=3.0s；H=1s
黄灯启亮时的速度_decision speed（km/h）	decision speed(m/s)	Estimated Distance to Stop Line_leading	Front vehicle to stop line	Estimated Distance to Stop Line_following	Following vehicle to Stop Line_following	logit（p）_leading	EXP_leading	logit（p）_following	EXP_following	P(stop)_leading	P(cross)_following	Probablity(rear-end)		黄灯启亮时的速度_decision speed（km/h）	decision speed(m/s)	Estimated Distance to Stop Line	Front vehicle to stop line	Estimated Distance to Stop Line_following	Following vehicle to Stop Line_following	logit（p）_leading	EXP_leading	logit（p）_following	EXP_following	P(stop)_leading	P(cross)_following	Probablity(rear-end)	Increased Crash Probability
1	0.277778	0.833333	3	1.11111	4	-3.476	0.0309309	-3.50433	0.0300668	0.969997	0.0291892	0.0283134		1	0.277778	0.833333	3	1.11111	4	-0.683	0.505099	-0.711333	0.490989	0.664408	0.329304	0.218792	-0.190479
2	0.555556	1.66667	3	2.22222	4	-3.408	0.0331073	-3.46467	0.0312834	0.967954	0.0303345	0.0293624		2	0.555556	1.66667	3	2.22222	4	-0.615	0.540641	-0.671667	0.510856	0.649081	0.338124	0.21947	-0.190107
3	0.833333	2.5	3	3.33333	4	-3.34	0.035437	-3.425	0.0325493	0.965776	0.0315232	0.0304444		3	0.833333	2.5	3	3.33333	4	-0.547	0.578683	-0.632	0.531528	0.633439	0.347057	0.21984	-0.189395
4	1.11111	3.33333	3	4.44444	4	-3.272	0.0379305	-3.38533	0.0338664	0.963456	0.032757	0.0315599		4	1.11111	3.33333	3	4.44444	4	-0.479	0.619402	-0.592333	0.553035	0.617512	0.3561	0.219896	-0.188336
5	1.38889	4.16667	3	5.55556	4	-3.204	0.0405995	-3.34567	0.0352367	0.960985	0.0340374	0.0327094		5	1.38889	4.16667	3	5.55556	4	-0.411	0.662987	-0.552667	0.575413	0.601328	0.365246	0.219632	-0.186923
6	1.66667	5	3	6.66667	4	-3.136	0.0434563	-3.306	0.0366625	0.958354	0.0353659	0.0338931		6	1.66667	5	3	6.66667	4	-0.343	0.709638	-0.513	0.598697	0.584919	0.374491	0.219047	-0.185154
7	1.94444	5.83333	3	7.77778	4	-3.068	0.0465141	-3.26633	0.038146	0.955553	0.0367444	0.0351112		7	1.94444	5.83333	3	7.77778	4	-0.275	0.759572	-0.473333	0.622922	0.56832	0.383828	0.218137	-0.183026
8	2.22222	6.66667	3	8.88889	4	-3	0.0497871	-3.22667	0.0396896	0.952574	0.0381744	0.036364		8	2.22222	6.66667	3	8.88889	4	-0.207	0.81302	-0.433667	0.648128	0.551566	0.393251	0.216904	-0.18054
9	2.5	7.5	3	10	4	-2.932	0.0532904	-3.187	0.0412956	0.949406	0.0396579	0.0376514		9	2.5	7.5	3	10	4	-0.139	0.870228	-0.394	0.674354	0.534694	0.402755	0.215351	-0.177699
10	2.77778	8.33333	3	11.1111	4	-2.864	0.0570401	-3.14733	0.0429666	0.946038	0.0411965	0.0389734		10	2.77778	8.33333	3	11.1111	4	-0.071	0.931462	-0.354333	0.701641	0.517743	0.412332	0.213482	-0.174508
11	3.05556	9.16667	3	12.2222	4	-2.796	0.0610538	-3.10767	0.0447051	0.942459	0.0427921	0.0403298		11	3.05556	9.16667	3	12.2222	4	-0.003	0.997004	-0.314667	0.730032	0.50075	0.421976	0.211305	-0.170975
12	3.33333	10	3	13.3333	4	-2.728	0.0653499	-3.068	0.0465141	0.938659	0.0444467	0.0417203		12	3.33333	10	3	13.3333	4	0.065	1.06716	-0.275	0.759572	0.483756	0.43168	0.208828	-0.167107
13	3.61111	10.8333	3	14.4444	4	-2.66	0.0699482	-3.02833	0.0483962	0.934625	0.0461622	0.0431443		13	3.61111	10.8333	3	14.4444	4	0.133	1.14225	-0.235333	0.790307	0.466799	0.441437	0.206062	-0.162918
14	3.88889	11.6667	3	15.5556	4	-2.592	0.0748701	-2.98867	0.0503545	0.930345	0.0479405	0.0446012		14	3.88889	11.6667	3	15.5556	4	0.201	1.22262	-0.195667	0.822286	0.449918	0.451239	0.203021	-0.158419
15	4.16667	12.5	3	16.6667	4	-2.524	0.0801384	-2.949	0.0523921	0.925807	0.0497838	0.0460902		15	4.16667	12.5	3	16.6667	4	0.269	1.30866	-0.156	0.855559	0.433153	0.461079	0.199718	-0.153627
16	4.44444	13.3333	3	17.7778	4	-2.456	0.0857774	-2.90933	0.0545121	0.920999	0.0516941	0.0476102		16	4.44444	13.3333	3	17.7778	4	0.337	1.40074	-0.116333	0.890178	0.416538	0.470949	0.196169	-0.148558
17	4.72222	14.1667	3	18.8889	4	-2.388	0.0918131	-2.86967	0.0567178	0.915908	0.0536736	0.04916		17	4.72222	14.1667	3	18.8889	4	0.405	1.4993	-0.0766667	0.926199	0.400112	0.480843	0.192391	-0.143231
18	5	15	3	20	4	-2.32	0.0982736	-2.83	0.0590129	0.91052	0.0557244	0.0507382		18	5	15	3	20	4	0.473	1.6048	-0.037	0.963676	0.383906	0.490751	0.188402	-0.137664
19	5.27778	15.8333	3	21.1111	4	-2.252	0.105189	-2.79033	0.0614007	0.904823	0.0578488	0.0523429		19	5.27778	15.8333	3	21.1111	4	0.541	1.71772	0.00266667	1.00267	0.367955	0.500667	0.184223	-0.13188
20	5.55556	16.6667	3	22.2222	4	-2.184	0.11259	-2.75067	0.0638853	0.898803	0.060049	0.0539723		20	5.55556	16.6667	3	22.2222	4	0.609	1.83859	0.0423333	1.04324	0.352287	0.510582	0.179871	-0.125899
21	5.83333	17.5	3	23.3333	4	-2.116	0.120513	-2.711	0.0664703	0.892449	0.0623274	0.055624		21	5.83333	17.5	3	23.3333	4	0.677	1.96796	0.082	1.08546	0.336931	0.520489	0.175369	-0.119745
22	6.11111	18.3333	3	24.4444	4	-2.048	0.128993	-2.67133	0.06916	0.885745	0.0646863	0.0572955		22	6.11111	18.3333	3	24.4444	4	0.745	2.10644	0.121667	1.12938	0.321912	0.530379	0.170735	-0.11344
23	6.38889	19.1667	3	25.5556	4	-1.98	0.138069	-2.63167	0.0719584	0.878681	0.067128	0.0589841		23	6.38889	19.1667	3	25.5556	4	0.813	2.25466	0.161333	1.17508	0.307252	0.540246	0.165991	-0.107007
24	6.66667	20	3	26.6667	4	-1.912	0.147785	-2.592	0.0748701	0.871244	0.0696551	0.0606865		24	6.66667	20	3	26.6667	4	0.881	2.41331	0.201	1.22262	0.292971	0.550082	0.161158	-0.100471
25	6.94444	20.8333	3	27.7778	4	-1.844	0.158183	-2.55233	0.0778997	0.863421	0.0722699	0.0623993		25	6.94444	20.8333	3	27.7778	4	0.949	2.58313	0.240667	1.2721	0.279086	0.559878	0.156254	-0.0938547
26	7.22222	21.6667	3	28.8889	4	-1.776	0.169314	-2.51267	0.0810518	0.855202	0.074975	0.0641188		26	7.22222	21.6667	3	28.8889	4	1.017	2.76489	0.280333	1.32357	0.265612	0.569628	0.1513	-0.0871814
27	7.5	22.5	3	30	4	-1.708	0.181228	-2.473	0.0843315	0.846577	0.0777728	0.0658406		27	7.5	22.5	3	30	4	1.085	2.95944	0.32	1.37713	0.252561	0.579324	0.146315	-0.0804741
28	7.77778	23.3333	3	31.1111	4	-1.64	0.19398	-2.43333	0.0877439	0.837535	0.0806659	0.0675605		28	7.77778	23.3333	3	31.1111	4	1.153	3.16768	0.359667	1.43285	0.239942	0.58896	0.141316	-0.0737554
29	8.05556	24.1667	3	32.2222	4	-1.572	0.20763	-2.39367	0.0912943	0.828069	0.0836569	0.0692737		29	8.05556	24.1667	3	32.2222	4	1.221	3.39058	0.399333	1.49083	0.227761	0.598527	0.136321	-0.0670473
30	8.33333	25	3	33.3333	4	-1.504	0.222239	-2.354	0.0949884	0.81817	0.0867484	0.0709749		30	8.33333	25	3	33.3333	4	1.289	3.62916	0.439	1.55116	0.216022	0.608021	0.131346	-0.060371
31	8.61111	25.8333	3	34.4444	4	-1.436	0.237877	-2.31433	0.0988321	0.807834	0.0899428	0.0726589		31	8.61111	25.8333	3	34.4444	4	1.357	3.88452	0.478667	1.61392	0.204728	0.617433	0.126406	-0.0537471
32	8.88889	26.6667	3	35.5556	4	-1.368	0.254616	-2.27467	0.102831	0.797057	0.0932429	0.0743199		32	8.88889	26.6667	3	35.5556	4	1.425	4.15786	0.518333	1.67923	0.193879	0.626758	0.121515	-0.0471953
33	9.16667	27.5	3	36.6667	4	-1.3	0.272532	-2.235	0.106992	0.785835	0.0966512	0.0759519		33	9.16667	27.5	3	36.6667	4	1.493	4.45043	0.558	1.74717	0.183472	0.63599	0.116686	-0.0407343
34	9.44444	28.3333	3	37.7778	4	-1.232	0.291709	-2.19533	0.111321	0.774168	0.10017	0.0775487		34	9.44444	28.3333	3	37.7778	4	1.561	4.76358	0.597667	1.81787	0.173503	0.645122	0.111931	-0.0343821
35	9.72222	29.1667	3	38.8889	4	-1.164	0.312235	-2.15567	0.115826	0.762059	0.103803	0.0791039		35	9.72222	29.1667	3	38.8889	4	1.629	5.09877	0.637333	1.89143	0.163967	0.65415	0.107259	-0.0281554
36	10	30	3	40	4	-1.096	0.334205	-2.116	0.120513	0.74951	0.107551	0.0806108		36	10	30	3	40	4	1.697	5.45755	0.677	1.96796	0.154857	0.663069	0.102681	-0.0220703
37	10.2778	30.8333	3	41.1111	4	-1.028	0.357722	-2.07633	0.125389	0.736528	0.111418	0.0820628		37	10.2778	30.8333	3	41.1111	4	1.765	5.84157	0.716667	2.0476	0.146165	0.671873	0.0982044	-0.0161416
38	10.5556	31.6667	3	42.2222	4	-0.96	0.382893	-2.03667	0.130463	0.723122	0.115407	0.083453		38	10.5556	31.6667	3	42.2222	4	1.833	6.25262	0.756333	2.13045	0.137881	0.680557	0.0938361	-0.0103831
39	10.8333	32.5	3	43.3333	4	-0.892	0.409835	-1.997	0.135742	0.709303	0.119518	0.0847746		39	10.8333	32.5	3	43.3333	4	1.901	6.69258	0.796	2.21666	0.129995	0.689118	0.0895822	-0.00480752
40	11.1111	33.3333	3	44.4444	4	-0.824	0.438673	-1.95733	0.141235	0.695085	0.123756	0.0860209		40	11.1111	33.3333	3	44.4444	4	1.969	7.16351	0.835667	2.30635	0.122496	0.697552	0.0854475	0.000573325	40km/h
41	11.3889	34.1667	3	45.5556	4	-0.756	0.469541	-1.91767	0.146949	0.680485	0.128122	0.087185		41	11.3889	34.1667	3	45.5556	4	2.037	7.66757	0.875333	2.39968	0.115373	0.705854	0.0814362	0.00574883
42	11.6667	35	3	46.6667	4	-0.688	0.50258	-1.878	0.152896	0.665522	0.132619	0.0882607		42	11.6667	35	3	46.6667	4	2.105	8.2071	0.915	2.49678	0.108612	0.714022	0.0775512	0.0107095
43	11.9444	35.8333	3	47.7778	4	-0.62	0.537944	-1.83833	0.159082	0.650219	0.137249	0.0892415		43	11.9444	35.8333	3	47.7778	4	2.173	8.7846	0.954667	2.5978	0.102201	0.722053	0.0737948	0.0154467
44	12.2222	36.6667	3	48.8889	4	-0.552	0.575797	-1.79867	0.165519	0.634599	0.142013	0.0901217		44	12.2222	36.6667	3	48.8889	4	2.241	9.40273	0.994333	2.70292	0.0961286	0.729943	0.0701684	0.0199532
45	12.5	37.5	3	50	4	-0.484	0.616313	-1.759	0.172217	0.618692	0.146916	0.0908955		45	12.5	37.5	3	50	4	2.309	10.0644	1.034	2.81229	0.0903803	0.737691	0.0666727	0.0242228
46	12.7778	38.3333	3	51.1111	4	-0.416	0.65968	-1.71933	0.179186	0.602526	0.151957	0.091558		46	12.7778	38.3333	3	51.1111	4	2.377	10.7725	1.07367	2.92609	0.0849435	0.745294	0.0633078	0.0282502
47	13.0556	39.1667	3	52.2222	4	-0.348	0.706099	-1.67967	0.186436	0.586133	0.15714	0.0921046		47	13.0556	39.1667	3	52.2222	4	2.445	11.5305	1.11333	3.04449	0.079805	0.75275	0.0600732	0.0320314
48	13.3333	40	3	53.3333	4	-0.28	0.755784	-1.64	0.19398	0.569546	0.162465	0.0925314		48	13.3333	40	3	53.3333	4	2.513	12.3419	1.153	3.16768	0.0749518	0.760058	0.0569678	0.0355636
49	13.6111	40.8333	3	54.4444	4	-0.212	0.808965	-1.60033	0.201829	0.552802	0.167935	0.0928349		49	13.6111	40.8333	3	54.4444	4	2.581	13.2103	1.19267	3.29586	0.0703713	0.767218	0.0539901	0.0388448
50	13.8889	41.6667	3	55.5556	4	-0.144	0.865888	-1.56067	0.209996	0.535938	0.173551	0.0930126		50	13.8889	41.6667	3	55.5556	4	2.649	14.1399	1.23233	3.42922	0.0660507	0.774227	0.0511382	0.0418744
51	14.1667	42.5	3	56.6667	4	-0.076	0.926816	-1.521	0.218493	0.518991	0.179314	0.0930625		51	14.1667	42.5	3	56.6667	4	2.717	15.1348	1.272	3.56798	0.0619776	0.781085	0.0484098	0.0446527
52	14.4444	43.3333	3	57.7778	4	-0.008	0.992032	-1.48133	0.227334	0.502	0.185226	0.0929835		52	14.4444	43.3333	3	57.7778	4	2.785	16.1998	1.31167	3.71236	0.0581402	0.787792	0.0458023	0.0471812
53	14.7222	44.1667	3	58.8889	4	0.06	1.06184	-1.44167	0.236533	0.485004	0.191287	0.0927752		53	14.7222	44.1667	3	58.8889	4	2.853	17.3397	1.35133	3.86257	0.0545265	0.794348	0.043313	0.0494623
54	15	45	3	60	4	0.128	1.13655	-1.402	0.246104	0.468044	0.197499	0.0924381		54	15	45	3	60	4	2.921	18.5598	1.391	4.01887	0.0511252	0.800752	0.0409386	0.0514995
55	15.2778	45.8333	3	61.1111	4	0.196	1.21653	-1.36233	0.256063	0.451156	0.203861	0.0919733		55	15.2778	45.8333	3	61.1111	4	2.989	19.8658	1.43067	4.18149	0.0479253	0.807005	0.038676	0.0532974
56	15.5556	46.6667	3	62.2222	4	0.264	1.30213	-1.32267	0.266424	0.434381	0.210375	0.0913828		56	15.5556	46.6667	3	62.2222	4	3.057	21.2637	1.47033	4.35069	0.0449162	0.813108	0.0365217	0.0548611
57	15.8333	47.5	3	63.3333	4	0.332	1.39375	-1.283	0.277204	0.417754	0.21704	0.0906693		57	15.8333	47.5	3	63.3333	4	3.125	22.7599	1.51	4.52673	0.0420877	0.819061	0.0344724	0.0561969
58	16.1111	48.3333	3	64.4444	4	0.4	1.49182	-1.24333	0.288421	0.401312	0.223856	0.0898363		58	16.1111	48.3333	3	64.4444	4	3.193	24.3614	1.54967	4.7099	0.03943	0.824866	0.0325244	0.0573118
59	16.3889	49.1667	3	65.5556	4	0.468	1.5968	-1.20367	0.300092	0.38509	0.230824	0.0888878		59	16.3889	49.1667	3	65.5556	4	3.261	26.0756	1.58933	4.90048	0.0369336	0.830522	0.0306742	0.0582136
60	16.6667	50	3	66.6667	4	0.536	1.70916	-1.164	0.312235	0.369119	0.237941	0.0878285		60	16.6667	50	3	66.6667	4	3.329	27.9104	1.629	5.09877	0.0345896	0.836033	0.028918	0.0589105
61	16.9444	50.8333	3	67.7778	4	0.604	1.82942	-1.12433	0.324869	0.353429	0.245208	0.0866638		61	16.9444	50.8333	3	67.7778	4	3.397	29.8743	1.66867	5.30509	0.0323894	0.841398	0.0272523	0.0594114
62	17.2222	51.6667	3	68.8889	4	0.672	1.95815	-1.08467	0.338014	0.338049	0.252624	0.0853993		62	17.2222	51.6667	3	68.8889	4	3.465	31.9765	1.70833	5.51975	0.0303247	0.84662	0.0256735	0.0597258
63	17.5	52.5	3	70	4	0.74	2.09594	-1.045	0.351692	0.323004	0.260186	0.0840413		63	17.5	52.5	3	70	4	3.533	34.2265	1.748	5.7431	0.0283877	0.8517	0.0241778	0.0598634
64	17.7778	53.3333	3	71.1111	4	0.808	2.24342	-1.00533	0.365923	0.308317	0.267894	0.0825963		64	17.7778	53.3333	3	71.1111	4	3.601	36.6349	1.78767	5.97549	0.0265711	0.856641	0.0227619	0.0598344
65	18.0556	54.1667	3	72.2222	4	0.876	2.40128	-0.965667	0.380729	0.294007	0.275745	0.0810711		65	18.0556	54.1667	3	72.2222	4	3.669	39.2127	1.82733	6.21729	0.0248678	0.861444	0.0214222	0.0596489
66	18.3333	55	3	73.3333	4	0.944	2.57024	-0.926	0.396135	0.280093	0.283737	0.0794727		66	18.3333	55	3	73.3333	4	3.737	41.9719	1.867	6.46886	0.023271	0.866111	0.0201553	0.0593175
67	18.6111	55.8333	3	74.4444	4	1.012	2.7511	-0.886333	0.412164	0.266589	0.291867	0.0778084		67	18.6111	55.8333	3	74.4444	4	3.805	44.9253	1.90667	6.73062	0.0217745	0.870644	0.0189579	0.0588506
68	18.8889	56.6667	3	75.5556	4	1.08	2.94468	-0.846667	0.428842	0.253506	0.300133	0.0760854		68	18.8889	56.6667	3	75.5556	4	3.873	48.0864	1.94633	7.00296	0.0203722	0.875046	0.0178266	0.0582588
69	19.1667	57.5	3	76.6667	4	1.148	3.15188	-0.807	0.446195	0.240855	0.30853	0.0743109		69	19.1667	57.5	3	76.6667	4	3.941	51.47	1.986	7.28633	0.0190585	0.879319	0.0167585	0.0575524
70	19.4444	58.3333	3	77.7778	4	1.216	3.37367	-0.767333	0.464249	0.228641	0.317056	0.0724921		70	19.4444	58.3333	3	77.7778	4	4.009	55.0918	2.02567	7.58116	0.0178279	0.883466	0.0157504	0.0567417
71	19.7222	59.1667	3	78.8889	4	1.284	3.61106	-0.727667	0.483035	0.21687	0.325707	0.0706361		71	19.7222	59.1667	3	78.8889	4	4.077	58.9683	2.06533	7.88793	0.0166755	0.887488	0.0147993	0.0558368
72	20	60	3	80	4	1.352	3.86515	-0.688	0.50258	0.205544	0.334478	0.0687498		72	20	60	3	80	4	4.145	63.1176	2.105	8.2071	0.0155963	0.891388	0.0139024	0.0548474
73	20.2778	60.8333	3	81.1111	4	1.42	4.13712	-0.648333	0.522917	0.194662	0.343365	0.06684		73	20.2778	60.8333	3	81.1111	4	4.213	67.5589	2.14467	8.53919	0.014586	0.895169	0.0130569	0.0537831
74	20.5556	61.6667	3	82.2222	4	1.488	4.42823	-0.608667	0.544076	0.184222	0.352363	0.0649131		74	20.5556	61.6667	3	82.2222	4	4.281	72.3127	2.18433	8.88472	0.0136402	0.898834	0.0122603	0.0526529
75	20.8333	62.5	3	83.3333	4	1.556	4.73982	-0.569	0.566091	0.174221	0.361468	0.0629754		75	20.8333	62.5	3	83.3333	4	4.349	77.401	2.224	9.24423	0.0127549	0.902384	0.0115099	0.0514655
76	21.1111	63.3333	3	84.4444	4	1.624	5.07334	-0.529333	0.588998	0.164654	0.370672	0.0610327		76	21.1111	63.3333	3	84.4444	4	4.417	82.8474	2.26367	9.61829	0.0119264	0.905823	0.0108032	0.0502294
77	21.3889	64.1667	3	85.5556	4	1.692	5.43033	-0.489667	0.612831	0.155513	0.379972	0.0590906		77	21.3889	64.1667	3	85.5556	4	4.485	88.677	2.30333	10.0075	0.0111511	0.909153	0.0101381	0.0489525
78	21.6667	65	3	86.6667	4	1.76	5.81244	-0.45	0.637628	0.14679	0.389361	0.0571544		78	21.6667	65	3	86.6667	4	4.553	94.9167	2.343	10.4124	0.0104257	0.912376	0.00951217	0.0476422
79	21.9444	65.8333	3	87.7778	4	1.828	6.22143	-0.410333	0.663429	0.138477	0.398832	0.055229		79	21.9444	65.8333	3	87.7778	4	4.621	101.596	2.38267	10.8338	0.00974701	0.915496	0.00892335	0.0463056
80	22.2222	66.6667	3	88.8889	4	1.896	6.6592	-0.370667	0.690274	0.130562	0.40838	0.0533188		80	22.2222	66.6667	3	88.8889	4	4.689	108.744	2.42233	11.2721	0.00911208	0.918515	0.00836958	0.0449493
81	22.5	67.5	3	90	4	1.964	7.12778	-0.331	0.718205	0.123035	0.417997	0.0514282		81	22.5	67.5	3	90	4	4.757	116.396	2.462	11.7282	0.00851816	0.921435	0.00784893	0.0435793
82	22.7778	68.3333	3	91.1111	4	2.032	7.62933	-0.291333	0.747267	0.115884	0.427677	0.0495609		82	22.7778	68.3333	3	91.1111	4	4.825	124.586	2.50167	12.2028	0.00796264	0.924259	0.00735954	0.0422014
83	23.0556	69.1667	3	92.2222	4	2.1	8.16617	-0.251667	0.777504	0.109097	0.437413	0.0477204		83	23.0556	69.1667	3	92.2222	4	4.893	133.353	2.54133	12.6966	0.00744308	0.926989	0.00689965	0.0408208
84	23.3333	70	3	93.3333	4	2.168	8.74078	-0.212	0.808965	0.102661	0.447198	0.0459098		84	23.3333	70	3	93.3333	4	4.961	142.736	2.581	13.2103	0.00695718	0.929629	0.00646759	0.0394422
85	23.6111	70.8333	3	94.4444	4	2.236	9.35583	-0.172333	0.841699	0.0965639	0.457023	0.0441319		85	23.6111	70.8333	3	94.4444	4	5.029	152.78	2.62067	13.7449	0.00650279	0.93218	0.00606177	0.0380702
86	23.8889	71.6667	3	95.5556	4	2.304	10.0142	-0.132667	0.875757	0.0907922	0.466882	0.0423892		86	23.8889	71.6667	3	95.5556	4	5.097	163.531	2.66033	14.3011	0.0060779	0.934645	0.00568068	0.0367086
87	24.1667	72.5	3	96.6667	4	2.372	10.7188	-0.093	0.911194	0.0853329	0.476767	0.0406839		87	24.1667	72.5	3	96.6667	4	5.165	175.037	2.7	14.8797	0.00568061	0.937027	0.00532288	0.035361
88	24.4444	73.3333	3	97.7778	4	2.44	11.473	-0.0533333	0.948064	0.0801729	0.48667	0.0390177		88	24.4444	73.3333	3	97.7778	4	5.233	187.354	2.73967	15.4818	0.00530915	0.939327	0.00498703	0.0340307
89	24.7222	74.1667	3	98.8889	4	2.508	12.2803	-0.0136667	0.986426	0.0752992	0.496583	0.0373924		89	24.7222	74.1667	3	98.8889	4	5.301	200.537	2.77933	16.1083	0.00496186	0.941549	0.00467184	0.0327205
90	25	75	3	100	4	2.576	13.1445	0.026	1.02634	0.0706991	0.5065	0.0358091		90	25	75	3	100	4	5.369	214.648	2.819	16.7601	0.00463718	0.943694	0.00437608	0.031433
91	25.2778	75.8333	3	101.111	4	2.644	14.0694	0.0656667	1.06787	0.0663598	0.516411	0.0342689		91	25.2778	75.8333	3	101.111	4	5.437	229.752	2.85867	17.4383	0.00433366	0.945765	0.00409862	0.0301703
92	25.5556	76.6667	3	102.222	4	2.712	15.0594	0.105333	1.11108	0.062269	0.526309	0.0327727		92	25.5556	76.6667	3	102.222	4	5.505	245.918	2.89833	18.1439	0.00404992	0.947764	0.00383837	0.0289343
93	25.8333	77.5	3	103.333	4	2.78	16.119	0.145	1.15604	0.0584146	0.536187	0.0313211		93	25.8333	77.5	3	103.333	4	5.573	263.223	2.938	18.8781	0.00378469	0.949693	0.00359429	0.0277268
94	26.1111	78.3333	3	104.444	4	2.848	17.2532	0.184667	1.20282	0.0547848	0.546036	0.0299145		94	26.1111	78.3333	3	104.444	4	5.641	281.744	2.97767	19.6419	0.00353676	0.951555	0.00336543	0.026549
95	26.3889	79.1667	3	105.556	4	2.916	18.4673	0.224333	1.25149	0.0513683	0.555849	0.028553		95	26.3889	79.1667	3	105.556	4	5.709	301.569	3.01733	20.4367	0.00330503	0.953351	0.00315085	0.0254022
96	26.6667	80	3	106.667	4	2.984	19.7667	0.264	1.30213	0.048154	0.565619	0.0272368		96	26.6667	80	3	106.667	4	5.777	322.789	3.057	21.2637	0.00308843	0.955084	0.00294971	0.0242871
97	26.9444	80.8333	3	107.778	4	3.052	21.1576	0.303667	1.35482	0.0451312	0.575339	0.0259657		97	26.9444	80.8333	3	107.778	4	5.845	345.503	3.09667	22.1241	0.00288598	0.956755	0.00276118	0.0232045
98	27.2222	81.6667	3	108.889	4	3.12	22.6464	0.343333	1.40964	0.0422898	0.585	0.0247395		98	27.2222	81.6667	3	108.889	4	5.913	369.814	3.13633	23.0193	0.00269677	0.958367	0.0025845	0.022155
99	27.5	82.5	3	110	4	3.188	24.2399	0.383	1.46668	0.0396198	0.594596	0.0235578		99	27.5	82.5	3	110	4	5.981	395.836	3.176	23.9508	0.00251993	0.959921	0.00241894	0.0211389
100	27.7778	83.3333	3	111.111	4	3.256	25.9455	0.422667	1.52603	0.0371119	0.604121	0.0224201		100	27.7778	83.3333	3	111.111	4	6.049	423.689	3.21567	24.9199	0.00235466	0.96142	0.00226382	0.0201563
Front vehicle to stop line=3.0s；H=1.5s
黄灯启亮时的速度_decision speed（km/h）	decision speed(m/s)	Estimated Distance to Stop Line_leading	Front vehicle to stop line	Estimated Distance to Stop Line_following	Following vehicle to Stop Line_following	logit（p）_leading	EXP_leading	logit（p）_following	EXP_following	P(stop)_leading	P(cross)_following	Probablity(rear-end)		黄灯启亮时的速度_decision speed（km/h）	decision speed(m/s)	Estimated Distance to Stop Line	Front vehicle to stop line	Estimated Distance to Stop Line_following	Following vehicle to Stop Line_following	logit（p）_leading	EXP_leading	logit（p）_following	EXP_following	P(stop)_leading	P(cross)_following	Probablity(rear-end)	Increased Crash Probability
1	0.277778	0.833333	3	1.25	4.5	-3.476	0.0309309	-3.5185	0.0296439	0.969997	0.0287904	0.0279266		1	0.277778	0.833333	3	1.25	4.5	-0.683	0.505099	-0.7255	0.484082	0.664408	0.326183	0.216719	-0.188792
2	0.555556	1.66667	3	2.5	4.5	-3.408	0.0331073	-3.493	0.0304095	0.967954	0.0295121	0.0285663		2	0.555556	1.66667	3	2.5	4.5	-0.615	0.540641	-0.7	0.496585	0.649081	0.331812	0.215373	-0.186807
3	0.833333	2.5	3	3.75	4.5	-3.34	0.035437	-3.4675	0.0311949	0.965776	0.0302512	0.0292159		3	0.833333	2.5	3	3.75	4.5	-0.547	0.578683	-0.6745	0.509411	0.633439	0.33749	0.213779	-0.184563
4	1.11111	3.33333	3	5	4.5	-3.272	0.0379305	-3.442	0.0320006	0.963456	0.0310083	0.0298752		4	1.11111	3.33333	3	5	4.5	-0.479	0.619402	-0.649	0.522568	0.617512	0.343215	0.211939	-0.182064
5	1.38889	4.16667	3	6.25	4.5	-3.204	0.0405995	-3.4165	0.0328271	0.960985	0.0317838	0.0305437		5	1.38889	4.16667	3	6.25	4.5	-0.411	0.662987	-0.6235	0.536065	0.601328	0.348986	0.209855	-0.179311
6	1.66667	5	3	7.5	4.5	-3.136	0.0434563	-3.391	0.033675	0.958354	0.0325779	0.0312212		6	1.66667	5	3	7.5	4.5	-0.343	0.709638	-0.598	0.54991	0.584919	0.354801	0.20753	-0.176309
7	1.94444	5.83333	3	8.75	4.5	-3.068	0.0465141	-3.3655	0.0345447	0.955553	0.0333912	0.0319071		7	1.94444	5.83333	3	8.75	4.5	-0.275	0.759572	-0.5725	0.564113	0.56832	0.36066	0.20497	-0.173063
8	2.22222	6.66667	3	10	4.5	-3	0.0497871	-3.34	0.035437	0.952574	0.0342242	0.032601		8	2.22222	6.66667	3	10	4.5	-0.207	0.81302	-0.547	0.578683	0.551566	0.366561	0.202182	-0.169581
9	2.5	7.5	3	11.25	4.5	-2.932	0.0532904	-3.3145	0.0363522	0.949406	0.0350771	0.0333024		9	2.5	7.5	3	11.25	4.5	-0.139	0.870228	-0.5215	0.593629	0.534694	0.372502	0.199174	-0.165872
10	2.77778	8.33333	3	12.5	4.5	-2.864	0.0570401	-3.289	0.0372911	0.946038	0.0359505	0.0340105		10	2.77778	8.33333	3	12.5	4.5	-0.071	0.931462	-0.496	0.608962	0.517743	0.378481	0.195956	-0.161945
11	3.05556	9.16667	3	13.75	4.5	-2.796	0.0610538	-3.2635	0.0382543	0.942459	0.0368448	0.0347247		11	3.05556	9.16667	3	13.75	4.5	-0.003	0.997004	-0.4705	0.62469	0.50075	0.384498	0.192537	-0.157813
12	3.33333	10	3	15	4.5	-2.728	0.0653499	-3.238	0.0392423	0.938659	0.0377605	0.0354442		12	3.33333	10	3	15	4.5	0.065	1.06716	-0.445	0.640824	0.483756	0.39055	0.188931	-0.153487
13	3.61111	10.8333	3	16.25	4.5	-2.66	0.0699482	-3.2125	0.0402558	0.934625	0.038698	0.0361681		13	3.61111	10.8333	3	16.25	4.5	0.133	1.14225	-0.4195	0.657375	0.466799	0.396636	0.185149	-0.148981
14	3.88889	11.6667	3	17.5	4.5	-2.592	0.0748701	-3.187	0.0412956	0.930345	0.0396579	0.0368955		14	3.88889	11.6667	3	17.5	4.5	0.201	1.22262	-0.394	0.674354	0.449918	0.402755	0.181207	-0.144311
15	4.16667	12.5	3	18.75	4.5	-2.524	0.0801384	-3.1615	0.0423622	0.925807	0.0406405	0.0376253		15	4.16667	12.5	3	18.75	4.5	0.269	1.30866	-0.3685	0.691771	0.433153	0.408904	0.177118	-0.139492
16	4.44444	13.3333	3	20	4.5	-2.456	0.0857774	-3.136	0.0434563	0.920999	0.0416465	0.0383564		16	4.44444	13.3333	3	20	4.5	0.337	1.40074	-0.343	0.709638	0.416538	0.415081	0.172897	-0.134541
17	4.72222	14.1667	3	21.25	4.5	-2.388	0.0918131	-3.1105	0.0445787	0.915908	0.0426762	0.0390875		17	4.72222	14.1667	3	21.25	4.5	0.405	1.4993	-0.3175	0.727967	0.400112	0.421285	0.168561	-0.129474
18	5	15	3	22.5	4.5	-2.32	0.0982736	-3.085	0.04573	0.91052	0.0437302	0.0398173		18	5	15	3	22.5	4.5	0.473	1.6048	-0.292	0.746769	0.383906	0.427514	0.164125	-0.124308
19	5.27778	15.8333	3	23.75	4.5	-2.252	0.105189	-3.0595	0.0469111	0.904823	0.0448091	0.0405443		19	5.27778	15.8333	3	23.75	4.5	0.541	1.71772	-0.2665	0.766056	0.367955	0.433767	0.159607	-0.119062
20	5.55556	16.6667	3	25	4.5	-2.184	0.11259	-3.034	0.0481228	0.898803	0.0459133	0.041267		20	5.55556	16.6667	3	25	4.5	0.609	1.83859	-0.241	0.785842	0.352287	0.44004	0.15502	-0.113753
21	5.83333	17.5	3	26.25	4.5	-2.116	0.120513	-3.0085	0.0493657	0.892449	0.0470433	0.0419838		21	5.83333	17.5	3	26.25	4.5	0.677	1.96796	-0.2155	0.806138	0.336931	0.446333	0.150383	-0.1084
22	6.11111	18.3333	3	27.5	4.5	-2.048	0.128993	-2.983	0.0506407	0.885745	0.0481998	0.0426928		22	6.11111	18.3333	3	27.5	4.5	0.745	2.10644	-0.19	0.826959	0.321912	0.452642	0.145711	-0.103018
23	6.38889	19.1667	3	28.75	4.5	-1.98	0.138069	-2.9575	0.0519486	0.878681	0.0493832	0.0433921		23	6.38889	19.1667	3	28.75	4.5	0.813	2.25466	-0.1645	0.848318	0.307252	0.458967	0.141018	-0.0976264
24	6.66667	20	3	30	4.5	-1.912	0.147785	-2.932	0.0532904	0.871244	0.0505942	0.0440799		24	6.66667	20	3	30	4.5	0.881	2.41331	-0.139	0.870228	0.292971	0.465306	0.136321	-0.0922411
25	6.94444	20.8333	3	31.25	4.5	-1.844	0.158183	-2.9065	0.0546667	0.863421	0.0518332	0.0447539		25	6.94444	20.8333	3	31.25	4.5	0.949	2.58313	-0.1135	0.892704	0.279086	0.471655	0.131632	-0.0868786
26	7.22222	21.6667	3	32.5	4.5	-1.776	0.169314	-2.881	0.0560787	0.855202	0.0531008	0.045412		26	7.22222	21.6667	3	32.5	4.5	1.017	2.76489	-0.088	0.915761	0.265612	0.478014	0.126966	-0.0815544
27	7.5	22.5	3	33.75	4.5	-1.708	0.181228	-2.8555	0.0575271	0.846577	0.0543977	0.0460518		27	7.5	22.5	3	33.75	4.5	1.085	2.95944	-0.0625	0.939413	0.252561	0.48438	0.122336	-0.0762837
28	7.77778	23.3333	3	35	4.5	-1.64	0.19398	-2.83	0.0590129	0.837535	0.0557244	0.0466711		28	7.77778	23.3333	3	35	4.5	1.153	3.16768	-0.037	0.963676	0.239942	0.490751	0.117752	-0.0710804
29	8.05556	24.1667	3	36.25	4.5	-1.572	0.20763	-2.8045	0.060537	0.828069	0.0570815	0.0472674		29	8.05556	24.1667	3	36.25	4.5	1.221	3.39058	-0.0115	0.988566	0.227761	0.497125	0.113225	-0.0659581
30	8.33333	25	3	37.5	4.5	-1.504	0.222239	-2.779	0.0621006	0.81817	0.0584696	0.0478381		30	8.33333	25	3	37.5	4.5	1.289	3.62916	0.014	1.0141	0.216022	0.5035	0.108767	-0.060929
31	8.61111	25.8333	3	38.75	4.5	-1.436	0.237877	-2.7535	0.0637045	0.807834	0.0598893	0.0483806		31	8.61111	25.8333	3	38.75	4.5	1.357	3.88452	0.0395	1.04029	0.204728	0.509874	0.104386	-0.056005
32	8.88889	26.6667	3	40	4.5	-1.368	0.254616	-2.728	0.0653499	0.797057	0.0613412	0.0488924		32	8.88889	26.6667	3	40	4.5	1.425	4.15786	0.065	1.06716	0.193879	0.516244	0.100089	-0.0511965
33	9.16667	27.5	3	41.25	4.5	-1.3	0.272532	-2.7025	0.0670377	0.785835	0.062826	0.0493709		33	9.16667	27.5	3	41.25	4.5	1.493	4.45043	0.0905	1.09472	0.183472	0.52261	0.0958842	-0.0465133
34	9.44444	28.3333	3	42.5	4.5	-1.232	0.291709	-2.677	0.0687692	0.774168	0.0643443	0.0498133		34	9.44444	28.3333	3	42.5	4.5	1.561	4.76358	0.116	1.123	0.173503	0.528968	0.0917776	-0.0419643
35	9.72222	29.1667	3	43.75	4.5	-1.164	0.312235	-2.6515	0.0705453	0.762059	0.0658966	0.0502171		35	9.72222	29.1667	3	43.75	4.5	1.629	5.09877	0.1415	1.152	0.163967	0.535316	0.0877744	-0.0375573
36	10	30	3	45	4.5	-1.096	0.334205	-2.626	0.0723674	0.74951	0.0674837	0.0505797		36	10	30	3	45	4.5	1.697	5.45755	0.167	1.18175	0.154857	0.541653	0.0838791	-0.0332993
37	10.2778	30.8333	3	46.25	4.5	-1.028	0.357722	-2.6005	0.0742365	0.736528	0.0691062	0.0508987		37	10.2778	30.8333	3	46.25	4.5	1.765	5.84157	0.1925	1.21228	0.146165	0.547977	0.0800952	-0.0291965
38	10.5556	31.6667	3	47.5	4.5	-0.96	0.382893	-2.575	0.0761538	0.723122	0.0707648	0.0511716		38	10.5556	31.6667	3	47.5	4.5	1.833	6.25262	0.218	1.24359	0.137881	0.554285	0.0764255	-0.025254
39	10.8333	32.5	3	48.75	4.5	-0.892	0.409835	-2.5495	0.0781207	0.709303	0.0724601	0.0513961		39	10.8333	32.5	3	48.75	4.5	1.901	6.69258	0.2435	1.27571	0.129995	0.560576	0.0728723	-0.0214761
40	11.1111	33.3333	3	50	4.5	-0.824	0.438673	-2.524	0.0801384	0.695085	0.0741927	0.0515702		40	11.1111	33.3333	3	50	4.5	1.969	7.16351	0.269	1.30866	0.122496	0.566847	0.0694367	-0.0178665
41	11.3889	34.1667	3	51.25	4.5	-0.756	0.469541	-2.4985	0.0822082	0.680485	0.0759634	0.0516919		41	11.3889	34.1667	3	51.25	4.5	2.037	7.66757	0.2945	1.34245	0.115373	0.573097	0.0661197	-0.0144278
42	11.6667	35	3	52.5	4.5	-0.688	0.50258	-2.473	0.0843315	0.665522	0.0777728	0.0517595		42	11.6667	35	3	52.5	4.5	2.105	8.2071	0.32	1.37713	0.108612	0.579324	0.0629214	-0.011162
43	11.9444	35.8333	3	53.75	4.5	-0.62	0.537944	-2.4475	0.0865096	0.650219	0.0796216	0.0517714		43	11.9444	35.8333	3	53.75	4.5	2.173	8.7846	0.3455	1.4127	0.102201	0.585526	0.0598416	-0.00807017
44	12.2222	36.6667	3	55	4.5	-0.552	0.575797	-2.422	0.088744	0.634599	0.0815104	0.0517265		44	12.2222	36.6667	3	55	4.5	2.241	9.40273	0.371	1.44918	0.0961286	0.591701	0.0568794	-0.0051529
45	12.5	37.5	3	56.25	4.5	-0.484	0.616313	-2.3965	0.091036	0.618692	0.08344	0.0516236		45	12.5	37.5	3	56.25	4.5	2.309	10.0644	0.3965	1.48661	0.0903803	0.597846	0.0540336	-0.00240991
46	12.7778	38.3333	3	57.5	4.5	-0.416	0.65968	-2.371	0.0933873	0.602526	0.085411	0.0514623		46	12.7778	38.3333	3	57.5	4.5	2.377	10.7725	0.422	1.52501	0.0849435	0.603962	0.0513026	0.000159717	46km/h
47	13.0556	39.1667	3	58.75	4.5	-0.348	0.706099	-2.3455	0.0957993	0.586133	0.0874241	0.0512421		47	13.0556	39.1667	3	58.75	4.5	2.445	11.5305	0.4475	1.5644	0.079805	0.610045	0.0486846	0.00255753
48	13.3333	40	3	60	4.5	-0.28	0.755784	-2.32	0.0982736	0.569546	0.0894801	0.050963		48	13.3333	40	3	60	4.5	2.513	12.3419	0.473	1.6048	0.0749518	0.616094	0.0461773	0.00478568
49	13.6111	40.8333	3	61.25	4.5	-0.212	0.808965	-2.2945	0.100812	0.552802	0.0915795	0.0506254		49	13.6111	40.8333	3	61.25	4.5	2.581	13.2103	0.4985	1.64625	0.0703713	0.622107	0.0437785	0.00684691
50	13.8889	41.6667	3	62.5	4.5	-0.144	0.865888	-2.269	0.103416	0.535938	0.0937231	0.0502298		50	13.8889	41.6667	3	62.5	4.5	2.649	14.1399	0.524	1.68877	0.0660507	0.628083	0.0414853	0.00874449
51	14.1667	42.5	3	63.75	4.5	-0.076	0.926816	-2.2435	0.106087	0.518991	0.0959116	0.0497773		51	14.1667	42.5	3	63.75	4.5	2.717	15.1348	0.5495	1.73239	0.0619776	0.63402	0.039295	0.0104822
52	14.4444	43.3333	3	65	4.5	-0.008	0.992032	-2.218	0.108827	0.502	0.0981457	0.0492691		52	14.4444	43.3333	3	65	4.5	2.785	16.1998	0.575	1.77713	0.0581402	0.639916	0.0372048	0.0120643
53	14.7222	44.1667	3	66.25	4.5	0.06	1.06184	-2.1925	0.111637	0.485004	0.100426	0.0487071		53	14.7222	44.1667	3	66.25	4.5	2.853	17.3397	0.6005	1.82303	0.0545265	0.645771	0.0352116	0.0134955
54	15	45	3	67.5	4.5	0.128	1.13655	-2.167	0.114521	0.468044	0.102753	0.048093		54	15	45	3	67.5	4.5	2.921	18.5598	0.626	1.87012	0.0511252	0.651582	0.0333122	0.0147808
55	15.2778	45.8333	3	68.75	4.5	0.196	1.21653	-2.1415	0.117478	0.451156	0.105128	0.0474292		55	15.2778	45.8333	3	68.75	4.5	2.989	19.8658	0.6515	1.91842	0.0479253	0.657348	0.0315036	0.0159256
56	15.5556	46.6667	3	70	4.5	0.264	1.30213	-2.116	0.120513	0.434381	0.107551	0.0467183		56	15.5556	46.6667	3	70	4.5	3.057	21.2637	0.677	1.96796	0.0449162	0.663069	0.0297825	0.0169357
57	15.8333	47.5	3	71.25	4.5	0.332	1.39375	-2.0905	0.123625	0.417754	0.110024	0.0459628		57	15.8333	47.5	3	71.25	4.5	3.125	22.7599	0.7025	2.01879	0.0420877	0.668742	0.0281458	0.017817
58	16.1111	48.3333	3	72.5	4.5	0.4	1.49182	-2.065	0.126818	0.401312	0.112545	0.0451659		58	16.1111	48.3333	3	72.5	4.5	3.193	24.3614	0.728	2.07093	0.03943	0.674366	0.0265903	0.0185756
59	16.3889	49.1667	3	73.75	4.5	0.468	1.5968	-2.0395	0.130094	0.38509	0.115118	0.0443306		59	16.3889	49.1667	3	73.75	4.5	3.261	26.0756	0.7535	2.12442	0.0369336	0.679941	0.0251127	0.0192179
60	16.6667	50	3	75	4.5	0.536	1.70916	-2.014	0.133454	0.369119	0.117741	0.0434603		60	16.6667	50	3	75	4.5	3.329	27.9104	0.779	2.17929	0.0345896	0.685465	0.02371	0.0197504
61	16.9444	50.8333	3	76.25	4.5	0.604	1.82942	-1.9885	0.136901	0.353429	0.120416	0.0425584		61	16.9444	50.8333	3	76.25	4.5	3.397	29.8743	0.8045	2.23558	0.0323894	0.690936	0.022379	0.0201794
62	17.2222	51.6667	3	77.5	4.5	0.672	1.95815	-1.963	0.140436	0.338049	0.123143	0.0416283		62	17.2222	51.6667	3	77.5	4.5	3.465	31.9765	0.83	2.29332	0.0303247	0.696355	0.0211167	0.0205116
63	17.5	52.5	3	78.75	4.5	0.74	2.09594	-1.9375	0.144064	0.323004	0.125923	0.0406736		63	17.5	52.5	3	78.75	4.5	3.533	34.2265	0.8555	2.35255	0.0283877	0.70172	0.0199202	0.0207534
64	17.7778	53.3333	3	80	4.5	0.808	2.24342	-1.912	0.147785	0.308317	0.128756	0.0396977		64	17.7778	53.3333	3	80	4.5	3.601	36.6349	0.881	2.41331	0.0265711	0.707029	0.0187866	0.0209112
65	18.0556	54.1667	3	81.25	4.5	0.876	2.40128	-1.8865	0.151601	0.294007	0.131644	0.0387043		65	18.0556	54.1667	3	81.25	4.5	3.669	39.2127	0.9065	2.47564	0.0248678	0.712283	0.0177129	0.0209914
66	18.3333	55	3	82.5	4.5	0.944	2.57024	-1.861	0.155517	0.280093	0.134587	0.0376968		66	18.3333	55	3	82.5	4.5	3.737	41.9719	0.932	2.53958	0.023271	0.717481	0.0166965	0.0210002
67	18.6111	55.8333	3	83.75	4.5	1.012	2.7511	-1.8355	0.159534	0.266589	0.137584	0.0366784		67	18.6111	55.8333	3	83.75	4.5	3.805	44.9253	0.9575	2.60518	0.0217745	0.722621	0.0157347	0.0209437
68	18.8889	56.6667	3	85	4.5	1.08	2.94468	-1.81	0.163654	0.253506	0.140638	0.0356526		68	18.8889	56.6667	3	85	4.5	3.873	48.0864	0.983	2.67246	0.0203722	0.727703	0.0148249	0.0208277
69	19.1667	57.5	3	86.25	4.5	1.148	3.15188	-1.7845	0.167881	0.240855	0.143748	0.0346225		69	19.1667	57.5	3	86.25	4.5	3.941	51.47	1.0085	2.74149	0.0190585	0.732726	0.0139647	0.0206578
70	19.4444	58.3333	3	87.5	4.5	1.216	3.37367	-1.759	0.172217	0.228641	0.146916	0.033591		70	19.4444	58.3333	3	87.5	4.5	4.009	55.0918	1.034	2.81229	0.0178279	0.737691	0.0131515	0.0204395
71	19.7222	59.1667	3	88.75	4.5	1.284	3.61106	-1.7335	0.176665	0.21687	0.15014	0.032561		71	19.7222	59.1667	3	88.75	4.5	4.077	58.9683	1.0595	2.88493	0.0166755	0.742595	0.0123831	0.0201778
72	20	60	3	90	4.5	1.352	3.86515	-1.708	0.181228	0.205544	0.153423	0.0315352		72	20	60	3	90	4.5	4.145	63.1176	1.085	2.95944	0.0155963	0.747439	0.0116573	0.0198779
73	20.2778	60.8333	3	91.25	4.5	1.42	4.13712	-1.6825	0.185909	0.194662	0.156765	0.0305161		73	20.2778	60.8333	3	91.25	4.5	4.213	67.5589	1.1105	3.03588	0.014586	0.752222	0.0109719	0.0195442
74	20.5556	61.6667	3	92.5	4.5	1.488	4.42823	-1.657	0.19071	0.184222	0.160165	0.029506		74	20.5556	61.6667	3	92.5	4.5	4.281	72.3127	1.136	3.11429	0.0136402	0.756944	0.0103249	0.0191811
75	20.8333	62.5	3	93.75	4.5	1.556	4.73982	-1.6315	0.195636	0.174221	0.163625	0.028507		75	20.8333	62.5	3	93.75	4.5	4.349	77.401	1.1615	3.19472	0.0127549	0.761605	0.00971422	0.0187927
76	21.1111	63.3333	3	95	4.5	1.624	5.07334	-1.606	0.200689	0.164654	0.167145	0.027521		76	21.1111	63.3333	3	95	4.5	4.417	82.8474	1.187	3.27723	0.0119264	0.766204	0.00913808	0.018383
77	21.3889	64.1667	3	96.25	4.5	1.692	5.43033	-1.5805	0.205872	0.155513	0.170725	0.0265499		77	21.3889	64.1667	3	96.25	4.5	4.485	88.677	1.2125	3.36188	0.0111511	0.770741	0.00859464	0.0179553
78	21.6667	65	3	97.5	4.5	1.76	5.81244	-1.555	0.211189	0.14679	0.174365	0.0255951		78	21.6667	65	3	97.5	4.5	4.553	94.9167	1.238	3.44871	0.0104257	0.775216	0.00808217	0.017513
79	21.9444	65.8333	3	98.75	4.5	1.828	6.22143	-1.5295	0.216644	0.138477	0.178067	0.0246581		79	21.9444	65.8333	3	98.75	4.5	4.621	101.596	1.2635	3.53778	0.00974701	0.779628	0.00759904	0.0170591
80	22.2222	66.6667	3	100	4.5	1.896	6.6592	-1.504	0.222239	0.130562	0.18183	0.02374		80	22.2222	66.6667	3	100	4.5	4.689	108.744	1.289	3.62916	0.00911208	0.783978	0.00714367	0.0165964
81	22.5	67.5	3	101.25	4.5	1.964	7.12778	-1.4785	0.227979	0.123035	0.185654	0.0228419		81	22.5	67.5	3	101.25	4.5	4.757	116.396	1.3145	3.72289	0.00851816	0.788265	0.00671457	0.0161273
82	22.7778	68.3333	3	102.5	4.5	2.032	7.62933	-1.453	0.233868	0.115884	0.18954	0.0219647		82	22.7778	68.3333	3	102.5	4.5	4.825	124.586	1.34	3.81904	0.00796264	0.79249	0.00631031	0.0156543
83	23.0556	69.1667	3	103.75	4.5	2.1	8.16617	-1.4275	0.239908	0.109097	0.193489	0.021109		83	23.0556	69.1667	3	103.75	4.5	4.893	133.353	1.3655	3.91768	0.00744308	0.796652	0.00592954	0.0151794
84	23.3333	70	3	105	4.5	2.168	8.74078	-1.402	0.246104	0.102661	0.197499	0.0202755		84	23.3333	70	3	105	4.5	4.961	142.736	1.391	4.01887	0.00695718	0.800752	0.00557097	0.0147045
85	23.6111	70.8333	3	106.25	4.5	2.236	9.35583	-1.3765	0.252461	0.0965639	0.201572	0.0194646		85	23.6111	70.8333	3	106.25	4.5	5.029	152.78	1.4165	4.12267	0.00650279	0.804789	0.00523337	0.0142312
86	23.8889	71.6667	3	107.5	4.5	2.304	10.0142	-1.351	0.258981	0.0907922	0.205707	0.0186766		86	23.8889	71.6667	3	107.5	4.5	5.097	163.531	1.442	4.22915	0.0060779	0.808764	0.00491559	0.013761
87	24.1667	72.5	3	108.75	4.5	2.372	10.7188	-1.3255	0.26567	0.0853329	0.209905	0.0179118		87	24.1667	72.5	3	108.75	4.5	5.165	175.037	1.4675	4.33838	0.00568061	0.812677	0.0046165	0.0132953
88	24.4444	73.3333	3	110	4.5	2.44	11.473	-1.3	0.272532	0.0801729	0.214165	0.0171702		88	24.4444	73.3333	3	110	4.5	5.233	187.354	1.493	4.45043	0.00530915	0.816528	0.00433507	0.0128352
89	24.7222	74.1667	3	111.25	4.5	2.508	12.2803	-1.2745	0.279571	0.0752992	0.218488	0.016452		89	24.7222	74.1667	3	111.25	4.5	5.301	200.537	1.5185	4.56537	0.00496186	0.820317	0.0040703	0.0123817
90	25	75	3	112.5	4.5	2.576	13.1445	-1.249	0.286791	0.0706991	0.222873	0.0157569		90	25	75	3	112.5	4.5	5.369	214.648	1.544	4.68329	0.00463718	0.824045	0.00382125	0.0119357
91	25.2778	75.8333	3	113.75	4.5	2.644	14.0694	-1.2235	0.294199	0.0663598	0.227321	0.015085		91	25.2778	75.8333	3	113.75	4.5	5.437	229.752	1.5695	4.80425	0.00433366	0.827712	0.00358702	0.011498
92	25.5556	76.6667	3	115	4.5	2.712	15.0594	-1.198	0.301797	0.062269	0.231831	0.0144359		92	25.5556	76.6667	3	115	4.5	5.505	245.918	1.595	4.92833	0.00404992	0.831318	0.00336677	0.0110691
93	25.8333	77.5	3	116.25	4.5	2.78	16.119	-1.1725	0.309592	0.0584146	0.236403	0.0138094		93	25.8333	77.5	3	116.25	4.5	5.573	263.223	1.6205	5.05562	0.00378469	0.834864	0.0031597	0.0106497
94	26.1111	78.3333	3	117.5	4.5	2.848	17.2532	-1.147	0.317588	0.0547848	0.241037	0.0132052		94	26.1111	78.3333	3	117.5	4.5	5.641	281.744	1.646	5.18619	0.00353676	0.83835	0.00296505	0.0102401
95	26.3889	79.1667	3	118.75	4.5	2.916	18.4673	-1.1215	0.325791	0.0513683	0.245733	0.0126229		95	26.3889	79.1667	3	118.75	4.5	5.709	301.569	1.6715	5.32014	0.00330503	0.841776	0.00278209	0.0098408
96	26.6667	80	3	120	4.5	2.984	19.7667	-1.096	0.334205	0.048154	0.25049	0.0120621		96	26.6667	80	3	120	4.5	5.777	322.789	1.697	5.45755	0.00308843	0.845143	0.00261016	0.00945193
97	26.9444	80.8333	3	121.25	4.5	3.052	21.1576	-1.0705	0.342837	0.0451312	0.255308	0.0115224		97	26.9444	80.8333	3	121.25	4.5	5.845	345.503	1.7225	5.59851	0.00288598	0.848451	0.00244861	0.00907375
98	27.2222	81.6667	3	122.5	4.5	3.12	22.6464	-1.045	0.351692	0.0422898	0.260186	0.0110032		98	27.2222	81.6667	3	122.5	4.5	5.913	369.814	1.748	5.7431	0.00269677	0.8517	0.00229684	0.00870638
99	27.5	82.5	3	123.75	4.5	3.188	24.2399	-1.0195	0.360775	0.0396198	0.265125	0.0105042		99	27.5	82.5	3	123.75	4.5	5.981	395.836	1.7735	5.89144	0.00251993	0.854892	0.00215427	0.00834992
100	27.7778	83.3333	3	125	4.5	3.256	25.9455	-0.994	0.370093	0.0371119	0.270123	0.0100248		100	27.7778	83.3333	3	125	4.5	6.049	423.689	1.799	6.0436	0.00235466	0.858027	0.00202037	0.0080044
Front vehicle to stop line=3.0s；H=2.5s
黄灯启亮时的速度_decision speed（km/h）	decision speed(m/s)	Estimated Distance to Stop Line_leading	Front vehicle to stop line	Estimated Distance to Stop Line_following	Following vehicle to Stop Line_following	logit（p）_leading	EXP_leading	logit（p）_following	EXP_following	P(stop)_leading	P(cross)_following	Probablity(rear-end)		黄灯启亮时的速度_decision speed（km/h）	decision speed(m/s)	Estimated Distance to Stop Line	Front vehicle to stop line	Estimated Distance to Stop Line_following	Following vehicle to Stop Line_following	logit（p）_leading	EXP_leading	logit（p）_following	EXP_following	P(stop)_leading	P(cross)_following	Probablity(rear-end)	Increased Crash Probability
1	0.277778	0.833333	3	1.52778	5.5	-3.476	0.0309309	-3.54683	0.0288157	0.969997	0.0280087	0.0271683		1	0.277778	0.833333	3	1.52778	5.5	-0.683	0.505099	-0.753833	0.470559	0.664408	0.319987	0.212602	-0.185433
2	0.555556	1.66667	3	3.05556	5.5	-3.408	0.0331073	-3.54967	0.0287342	0.967954	0.0279316	0.0270365		2	0.555556	1.66667	3	3.05556	5.5	-0.615	0.540641	-0.756667	0.469228	0.649081	0.31937	0.207297	-0.180261
3	0.833333	2.5	3	4.58333	5.5	-3.34	0.035437	-3.5525	0.0286529	0.965776	0.0278548	0.0269015		3	0.833333	2.5	3	4.58333	5.5	-0.547	0.578683	-0.7595	0.4679	0.633439	0.318755	0.201912	-0.17501
4	1.11111	3.33333	3	6.11111	5.5	-3.272	0.0379305	-3.55533	0.0285718	0.963456	0.0277782	0.026763		4	1.11111	3.33333	3	6.11111	5.5	-0.479	0.619402	-0.762333	0.466576	0.617512	0.31814	0.196455	-0.169692
5	1.38889	4.16667	3	7.63889	5.5	-3.204	0.0405995	-3.55817	0.028491	0.960985	0.0277018	0.026621		5	1.38889	4.16667	3	7.63889	5.5	-0.411	0.662987	-0.765167	0.465256	0.601328	0.317526	0.190937	-0.164316
6	1.66667	5	3	9.16667	5.5	-3.136	0.0434563	-3.561	0.0284104	0.958354	0.0276255	0.026475		6	1.66667	5	3	9.16667	5.5	-0.343	0.709638	-0.768	0.46394	0.584919	0.316912	0.185368	-0.158893
7	1.94444	5.83333	3	10.6944	5.5	-3.068	0.0465141	-3.56383	0.02833	0.955553	0.0275495	0.0263251		7	1.94444	5.83333	3	10.6944	5.5	-0.275	0.759572	-0.770833	0.462627	0.56832	0.316299	0.179759	-0.153434
8	2.22222	6.66667	3	12.2222	5.5	-3	0.0497871	-3.56667	0.0282499	0.952574	0.0274737	0.0261708		8	2.22222	6.66667	3	12.2222	5.5	-0.207	0.81302	-0.773667	0.461318	0.551566	0.315686	0.174122	-0.147951
9	2.5	7.5	3	13.75	5.5	-2.932	0.0532904	-3.5695	0.0281699	0.949406	0.0273981	0.0260119		9	2.5	7.5	3	13.75	5.5	-0.139	0.870228	-0.7765	0.460013	0.534694	0.315075	0.168469	-0.142457
10	2.77778	8.33333	3	15.2778	5.5	-2.864	0.0570401	-3.57233	0.0280902	0.946038	0.0273227	0.0258483		10	2.77778	8.33333	3	15.2778	5.5	-0.071	0.931462	-0.779333	0.458712	0.517743	0.314464	0.162811	-0.136963
11	3.05556	9.16667	3	16.8056	5.5	-2.796	0.0610538	-3.57517	0.0280108	0.942459	0.0272475	0.0256797		11	3.05556	9.16667	3	16.8056	5.5	-0.003	0.997004	-0.782167	0.457414	0.50075	0.313853	0.157162	-0.131482
12	3.33333	10	3	18.3333	5.5	-2.728	0.0653499	-3.578	0.0279315	0.938659	0.0271725	0.0255057		12	3.33333	10	3	18.3333	5.5	0.065	1.06716	-0.785	0.45612	0.483756	0.313243	0.151533	-0.126027
13	3.61111	10.8333	3	19.8611	5.5	-2.66	0.0699482	-3.58083	0.0278525	0.934625	0.0270977	0.0253262		13	3.61111	10.8333	3	19.8611	5.5	0.133	1.14225	-0.787833	0.454829	0.466799	0.312634	0.145937	-0.120611
14	3.88889	11.6667	3	21.3889	5.5	-2.592	0.0748701	-3.58367	0.0277737	0.930345	0.0270231	0.0251408		14	3.88889	11.6667	3	21.3889	5.5	0.201	1.22262	-0.790667	0.453542	0.449918	0.312026	0.140386	-0.115245
15	4.16667	12.5	3	22.9167	5.5	-2.524	0.0801384	-3.5865	0.0276951	0.925807	0.0269487	0.0249493		15	4.16667	12.5	3	22.9167	5.5	0.269	1.30866	-0.7935	0.452259	0.433153	0.311418	0.134891	-0.109942
16	4.44444	13.3333	3	24.4444	5.5	-2.456	0.0857774	-3.58933	0.0276167	0.920999	0.0268745	0.0247514		16	4.44444	13.3333	3	24.4444	5.5	0.337	1.40074	-0.796333	0.45098	0.416538	0.31081	0.129464	-0.104713
17	4.72222	14.1667	3	25.9722	5.5	-2.388	0.0918131	-3.59217	0.0275386	0.915908	0.0268005	0.0245468		17	4.72222	14.1667	3	25.9722	5.5	0.405	1.4993	-0.799167	0.449704	0.400112	0.310204	0.124116	-0.0995693
18	5	15	3	27.5	5.5	-2.32	0.0982736	-3.595	0.0274607	0.91052	0.0267267	0.0243352		18	5	15	3	27.5	5.5	0.473	1.6048	-0.802	0.448431	0.383906	0.309598	0.118857	-0.0945214
19	5.27778	15.8333	3	29.0278	5.5	-2.252	0.105189	-3.59783	0.027383	0.904823	0.0266531	0.0241164		19	5.27778	15.8333	3	29.0278	5.5	0.541	1.71772	-0.804833	0.447162	0.367955	0.308993	0.113695	-0.089579
20	5.55556	16.6667	3	30.5556	5.5	-2.184	0.11259	-3.60067	0.0273055	0.898803	0.0265797	0.02389		20	5.55556	16.6667	3	30.5556	5.5	0.609	1.83859	-0.807667	0.445897	0.352287	0.308388	0.108641	-0.0847512
21	5.83333	17.5	3	32.0833	5.5	-2.116	0.120513	-3.6035	0.0272283	0.892449	0.0265065	0.0236557		21	5.83333	17.5	3	32.0833	5.5	0.677	1.96796	-0.8105	0.444636	0.336931	0.307784	0.103702	-0.0800463
22	6.11111	18.3333	3	33.6111	5.5	-2.048	0.128993	-3.60633	0.0271512	0.885745	0.0264335	0.0234134		22	6.11111	18.3333	3	33.6111	5.5	0.745	2.10644	-0.813333	0.443378	0.321912	0.307181	0.0988851	-0.0754717
23	6.38889	19.1667	3	35.1389	5.5	-1.98	0.138069	-3.60917	0.0270744	0.878681	0.0263607	0.0231626		23	6.38889	19.1667	3	35.1389	5.5	0.813	2.25466	-0.816167	0.442123	0.307252	0.306578	0.0941966	-0.0710339
24	6.66667	20	3	36.6667	5.5	-1.912	0.147785	-3.612	0.0269978	0.871244	0.0262881	0.0229033		24	6.66667	20	3	36.6667	5.5	0.881	2.41331	-0.819	0.440872	0.292971	0.305976	0.089642	-0.0667386
25	6.94444	20.8333	3	38.1944	5.5	-1.844	0.158183	-3.61483	0.0269214	0.863421	0.0262156	0.0226351		25	6.94444	20.8333	3	38.1944	5.5	0.949	2.58313	-0.821833	0.439625	0.279086	0.305375	0.0852258	-0.0625906
26	7.22222	21.6667	3	39.7222	5.5	-1.776	0.169314	-3.61767	0.0268452	0.855202	0.0261434	0.0223579		26	7.22222	21.6667	3	39.7222	5.5	1.017	2.76489	-0.824667	0.438381	0.265612	0.304774	0.0809517	-0.0585938
27	7.5	22.5	3	41.25	5.5	-1.708	0.181228	-3.6205	0.0267693	0.846577	0.0260714	0.0220714		27	7.5	22.5	3	41.25	5.5	1.085	2.95944	-0.8275	0.437141	0.252561	0.304174	0.0768225	-0.054751
28	7.77778	23.3333	3	42.7778	5.5	-1.64	0.19398	-3.62333	0.0266935	0.837535	0.0259995	0.0217755		28	7.77778	23.3333	3	42.7778	5.5	1.153	3.16768	-0.830333	0.435904	0.239942	0.303575	0.0728402	-0.0510646
29	8.05556	24.1667	3	44.3056	5.5	-1.572	0.20763	-3.62617	0.026618	0.828069	0.0259279	0.0214701		29	8.05556	24.1667	3	44.3056	5.5	1.221	3.39058	-0.833167	0.434671	0.227761	0.302976	0.069006	-0.0475359
30	8.33333	25	3	45.8333	5.5	-1.504	0.222239	-3.629	0.0265427	0.81817	0.0258564	0.021155		30	8.33333	25	3	45.8333	5.5	1.289	3.62916	-0.836	0.433441	0.216022	0.302378	0.0653203	-0.0441654
31	8.61111	25.8333	3	47.3611	5.5	-1.436	0.237877	-3.63183	0.0264676	0.807834	0.0257851	0.0208301		31	8.61111	25.8333	3	47.3611	5.5	1.357	3.88452	-0.838833	0.432214	0.204728	0.301781	0.061783	-0.0409529
32	8.88889	26.6667	3	48.8889	5.5	-1.368	0.254616	-3.63467	0.0263927	0.797057	0.0257141	0.0204956		32	8.88889	26.6667	3	48.8889	5.5	1.425	4.15786	-0.841667	0.430992	0.193879	0.301184	0.0583932	-0.0378976
33	9.16667	27.5	3	50.4167	5.5	-1.3	0.272532	-3.6375	0.0263181	0.785835	0.0256432	0.0201513		33	9.16667	27.5	3	50.4167	5.5	1.493	4.45043	-0.8445	0.429772	0.183472	0.300588	0.0551494	-0.0349981
34	9.44444	28.3333	3	51.9444	5.5	-1.232	0.291709	-3.64033	0.0262436	0.774168	0.0255725	0.0197974		34	9.44444	28.3333	3	51.9444	5.5	1.561	4.76358	-0.847333	0.428556	0.173503	0.299993	0.0520497	-0.0322523
35	9.72222	29.1667	3	53.4722	5.5	-1.164	0.312235	-3.64317	0.0261693	0.762059	0.025502	0.019434		35	9.72222	29.1667	3	53.4722	5.5	1.629	5.09877	-0.850167	0.427344	0.163967	0.299398	0.0490915	-0.0296575
36	10	30	3	55	5.5	-1.096	0.334205	-3.646	0.0260953	0.74951	0.0254317	0.0190613		36	10	30	3	55	5.5	1.697	5.45755	-0.853	0.426135	0.154857	0.298804	0.046272	-0.0272107
37	10.2778	30.8333	3	56.5278	5.5	-1.028	0.357722	-3.64883	0.0260215	0.736528	0.0253615	0.0186795		37	10.2778	30.8333	3	56.5278	5.5	1.765	5.84157	-0.855833	0.424929	0.146165	0.298211	0.043588	-0.0249086
38	10.5556	31.6667	3	58.0556	5.5	-0.96	0.382893	-3.65167	0.0259478	0.723122	0.0252916	0.0182889		38	10.5556	31.6667	3	58.0556	5.5	1.833	6.25262	-0.858667	0.423727	0.137881	0.297618	0.0410359	-0.0227471
39	10.8333	32.5	3	59.5833	5.5	-0.892	0.409835	-3.6545	0.0258744	0.709303	0.0252218	0.0178899		39	10.8333	32.5	3	59.5833	5.5	1.901	6.69258	-0.8615	0.422528	0.129995	0.297026	0.038612	-0.0207221
40	11.1111	33.3333	3	61.1111	5.5	-0.824	0.438673	-3.65733	0.0258012	0.695085	0.0251523	0.017483		40	11.1111	33.3333	3	61.1111	5.5	1.969	7.16351	-0.864333	0.421332	0.122496	0.296435	0.0363122	-0.0188292
41	11.3889	34.1667	3	62.6389	5.5	-0.756	0.469541	-3.66017	0.0257282	0.680485	0.0250829	0.0170685		41	11.3889	34.1667	3	62.6389	5.5	2.037	7.66757	-0.867167	0.42014	0.115373	0.295844	0.0341323	-0.0170638
42	11.6667	35	3	64.1667	5.5	-0.688	0.50258	-3.663	0.0256554	0.665522	0.0250137	0.0166472		42	11.6667	35	3	64.1667	5.5	2.105	8.2071	-0.87	0.418952	0.108612	0.295254	0.0320681	-0.0154209
43	11.9444	35.8333	3	65.6944	5.5	-0.62	0.537944	-3.66583	0.0255828	0.650219	0.0249447	0.0162195		43	11.9444	35.8333	3	65.6944	5.5	2.173	8.7846	-0.872833	0.417766	0.102201	0.294665	0.0301152	-0.0138957
44	12.2222	36.6667	3	67.2222	5.5	-0.552	0.575797	-3.66867	0.0255105	0.634599	0.0248759	0.0157862		44	12.2222	36.6667	3	67.2222	5.5	2.241	9.40273	-0.875667	0.416584	0.0961286	0.294077	0.0282692	-0.012483
45	12.5	37.5	3	68.75	5.5	-0.484	0.616313	-3.6715	0.0254383	0.618692	0.0248072	0.015348		45	12.5	37.5	3	68.75	5.5	2.309	10.0644	-0.8785	0.415406	0.0903803	0.293489	0.0265256	-0.0111776
46	12.7778	38.3333	3	70.2778	5.5	-0.416	0.65968	-3.67433	0.0253663	0.602526	0.0247388	0.0149058		46	12.7778	38.3333	3	70.2778	5.5	2.377	10.7725	-0.881333	0.41423	0.0849435	0.292902	0.0248801	-0.00997432
47	13.0556	39.1667	3	71.8056	5.5	-0.348	0.706099	-3.67717	0.0252945	0.586133	0.0246705	0.0144602		47	13.0556	39.1667	3	71.8056	5.5	2.445	11.5305	-0.884167	0.413058	0.079805	0.292315	0.0233282	-0.008868
48	13.3333	40	3	73.3333	5.5	-0.28	0.755784	-3.68	0.025223	0.569546	0.0246024	0.0140122		48	13.3333	40	3	73.3333	5.5	2.513	12.3419	-0.887	0.41189	0.0749518	0.291729	0.0218656	-0.00785343
49	13.6111	40.8333	3	74.8611	5.5	-0.212	0.808965	-3.68283	0.0251516	0.552802	0.0245345	0.0135627		49	13.6111	40.8333	3	74.8611	5.5	2.581	13.2103	-0.889833	0.410724	0.0703713	0.291144	0.0204882	-0.00692545
50	13.8889	41.6667	3	76.3889	5.5	-0.144	0.865888	-3.68567	0.0250804	0.535938	0.0244668	0.0131127		50	13.8889	41.6667	3	76.3889	5.5	2.649	14.1399	-0.892667	0.409562	0.0660507	0.29056	0.0191917	-0.00607898
51	14.1667	42.5	3	77.9167	5.5	-0.076	0.926816	-3.6885	0.0250095	0.518991	0.0243993	0.012663		51	14.1667	42.5	3	77.9167	5.5	2.717	15.1348	-0.8955	0.408403	0.0619776	0.289976	0.017972	-0.00530904
52	14.4444	43.3333	3	79.4444	5.5	-0.008	0.992032	-3.69133	0.0249387	0.502	0.0243319	0.0122146		52	14.4444	43.3333	3	79.4444	5.5	2.785	16.1998	-0.898333	0.407248	0.0581402	0.289393	0.0168254	-0.00461074
53	14.7222	44.1667	3	80.9722	5.5	0.06	1.06184	-3.69417	0.0248682	0.485004	0.0242647	0.0117685		53	14.7222	44.1667	3	80.9722	5.5	2.853	17.3397	-0.901167	0.406096	0.0545265	0.288811	0.0157478	-0.00397932
54	15	45	3	82.5	5.5	0.128	1.13655	-3.697	0.0247978	0.468044	0.0241978	0.0113256		54	15	45	3	82.5	5.5	2.921	18.5598	-0.904	0.404947	0.0511252	0.288229	0.0147358	-0.00341016
55	15.2778	45.8333	3	84.0278	5.5	0.196	1.21653	-3.69983	0.0247276	0.451156	0.0241309	0.0108868		55	15.2778	45.8333	3	84.0278	5.5	2.989	19.8658	-0.906833	0.403801	0.0479253	0.287648	0.0137856	-0.0028988
56	15.5556	46.6667	3	85.5556	5.5	0.264	1.30213	-3.70267	0.0246577	0.434381	0.0240643	0.0104531		56	15.5556	46.6667	3	85.5556	5.5	3.057	21.2637	-0.909667	0.402658	0.0449162	0.287068	0.012894	-0.00244094
57	15.8333	47.5	3	87.0833	5.5	0.332	1.39375	-3.7055	0.0245879	0.417754	0.0239979	0.0100252		57	15.8333	47.5	3	87.0833	5.5	3.125	22.7599	-0.9125	0.401519	0.0420877	0.286489	0.0120577	-0.00203245
58	16.1111	48.3333	3	88.6111	5.5	0.4	1.49182	-3.70833	0.0245184	0.401312	0.0239316	0.00960404		58	16.1111	48.3333	3	88.6111	5.5	3.193	24.3614	-0.915333	0.400383	0.03943	0.28591	0.0112734	-0.00166938
59	16.3889	49.1667	3	90.1389	5.5	0.468	1.5968	-3.71117	0.024449	0.38509	0.0238655	0.00919036		59	16.3889	49.1667	3	90.1389	5.5	3.261	26.0756	-0.918167	0.39925	0.0369336	0.285332	0.0105383	-0.00134797
60	16.6667	50	3	91.6667	5.5	0.536	1.70916	-3.714	0.0243798	0.369119	0.0237996	0.00878487		60	16.6667	50	3	91.6667	5.5	3.329	27.9104	-0.921	0.398121	0.0345896	0.284754	0.00984954	-0.00106467
61	16.9444	50.8333	3	93.1944	5.5	0.604	1.82942	-3.71683	0.0243108	0.353429	0.0237338	0.00838823		61	16.9444	50.8333	3	93.1944	5.5	3.397	29.8743	-0.923833	0.396994	0.0323894	0.284177	0.00920432	-0.000816095
62	17.2222	51.6667	3	94.7222	5.5	0.672	1.95815	-3.71967	0.024242	0.338049	0.0236683	0.00800104		62	17.2222	51.6667	3	94.7222	5.5	3.465	31.9765	-0.926667	0.395871	0.0303247	0.283601	0.00860012	-0.000599077
63	17.5	52.5	3	96.25	5.5	0.74	2.09594	-3.7225	0.0241735	0.323004	0.0236029	0.00762383		63	17.5	52.5	3	96.25	5.5	3.533	34.2265	-0.9295	0.394751	0.0283877	0.283026	0.00803447	-0.000410636	63km/h
64	17.7778	53.3333	3	97.7778	5.5	0.808	2.24342	-3.72533	0.0241051	0.308317	0.0235377	0.00725707		64	17.7778	53.3333	3	97.7778	5.5	3.601	36.6349	-0.932333	0.393634	0.0265711	0.282452	0.00750505	-0.000247988
65	18.0556	54.1667	3	99.3056	5.5	0.876	2.40128	-3.72817	0.0240369	0.294007	0.0234727	0.00690113		65	18.0556	54.1667	3	99.3056	5.5	3.669	39.2127	-0.935167	0.39252	0.0248678	0.281878	0.00700967	-0.00010854
66	18.3333	55	3	100.833	5.5	0.944	2.57024	-3.731	0.0239689	0.280093	0.0234078	0.00655636		66	18.3333	55	3	100.833	5.5	3.737	41.9719	-0.938	0.39141	0.023271	0.281305	0.00654625	1.01162e-05
67	18.6111	55.8333	3	102.361	5.5	1.012	2.7511	-3.73383	0.023901	0.266589	0.0233431	0.00622301		67	18.6111	55.8333	3	102.361	5.5	3.805	44.9253	-0.940833	0.390302	0.0217745	0.280732	0.0061128	0.000110205
68	18.8889	56.6667	3	103.889	5.5	1.08	2.94468	-3.73667	0.0238334	0.253506	0.0232786	0.00590127		68	18.8889	56.6667	3	103.889	5.5	3.873	48.0864	-0.943667	0.389198	0.0203722	0.28016	0.00570749	0.000193777
69	19.1667	57.5	3	105.417	5.5	1.148	3.15188	-3.7395	0.023766	0.240855	0.0232143	0.00559126		69	19.1667	57.5	3	105.417	5.5	3.941	51.47	-0.9465	0.388097	0.0190585	0.279589	0.00532855	0.000262714
70	19.4444	58.3333	3	106.944	5.5	1.216	3.37367	-3.74233	0.0236987	0.228641	0.0231501	0.00529307		70	19.4444	58.3333	3	106.944	5.5	4.009	55.0918	-0.949333	0.386999	0.0178279	0.279019	0.00497433	0.000318738
71	19.7222	59.1667	3	108.472	5.5	1.284	3.61106	-3.74517	0.0236317	0.21687	0.0230861	0.00500669		71	19.7222	59.1667	3	108.472	5.5	4.077	58.9683	-0.952167	0.385904	0.0166755	0.278449	0.00464327	0.000363416
72	20	60	3	110	5.5	1.352	3.86515	-3.748	0.0235648	0.205544	0.0230223	0.00473209		72	20	60	3	110	5.5	4.145	63.1176	-0.955	0.384812	0.0155963	0.27788	0.00433392	0.000398172
73	20.2778	60.8333	3	111.528	5.5	1.42	4.13712	-3.75083	0.0234982	0.194662	0.0229587	0.00446917		73	20.2778	60.8333	3	111.528	5.5	4.213	67.5589	-0.957833	0.383723	0.014586	0.277312	0.00404487	0.000424296
74	20.5556	61.6667	3	113.056	5.5	1.488	4.42823	-3.75367	0.0234317	0.184222	0.0228952	0.0042178		74	20.5556	61.6667	3	113.056	5.5	4.281	72.3127	-0.960667	0.382638	0.0136402	0.276745	0.00377485	0.000442949
75	20.8333	62.5	3	114.583	5.5	1.556	4.73982	-3.7565	0.0233654	0.174221	0.0228319	0.0039778		75	20.8333	62.5	3	114.583	5.5	4.349	77.401	-0.9635	0.381555	0.0127549	0.276178	0.00352263	0.000455173
76	21.1111	63.3333	3	116.111	5.5	1.624	5.07334	-3.75933	0.0232993	0.164654	0.0227688	0.00374897		76	21.1111	63.3333	3	116.111	5.5	4.417	82.8474	-0.966333	0.380476	0.0119264	0.275612	0.00328707	0.000461901
77	21.3889	64.1667	3	117.639	5.5	1.692	5.43033	-3.76217	0.0232333	0.155513	0.0227058	0.00353105		77	21.3889	64.1667	3	117.639	5.5	4.485	88.677	-0.969167	0.379399	0.0111511	0.275047	0.00306708	0.000463967
78	21.6667	65	3	119.167	5.5	1.76	5.81244	-3.765	0.0231676	0.14679	0.022643	0.00332378		78	21.6667	65	3	119.167	5.5	4.553	94.9167	-0.972	0.378326	0.0104257	0.274482	0.00286167	0.000462108
79	21.9444	65.8333	3	120.694	5.5	1.828	6.22143	-3.76783	0.0231021	0.138477	0.0225804	0.00312686		79	21.9444	65.8333	3	120.694	5.5	4.621	101.596	-0.974833	0.377255	0.00974701	0.273918	0.00266988	0.000456978
80	22.2222	66.6667	3	122.222	5.5	1.896	6.6592	-3.77067	0.0230367	0.130562	0.022518	0.00293999		80	22.2222	66.6667	3	122.222	5.5	4.689	108.744	-0.977667	0.376188	0.00911208	0.273355	0.00249083	0.000449153
81	22.5	67.5	3	123.75	5.5	1.964	7.12778	-3.7735	0.0229715	0.123035	0.0224557	0.00276283		81	22.5	67.5	3	123.75	5.5	4.757	116.396	-0.9805	0.375123	0.00851816	0.272793	0.00232369	0.000439139
82	22.7778	68.3333	3	125.278	5.5	2.032	7.62933	-3.77633	0.0229065	0.115884	0.0223936	0.00259505		82	22.7778	68.3333	3	125.278	5.5	4.825	124.586	-0.983333	0.374062	0.00796264	0.272231	0.00216768	0.000427376
83	23.0556	69.1667	3	126.806	5.5	2.1	8.16617	-3.77917	0.0228417	0.109097	0.0223316	0.00243631		83	23.0556	69.1667	3	126.806	5.5	4.893	133.353	-0.986167	0.373004	0.00744308	0.27167	0.00202206	0.000414249
84	23.3333	70	3	128.333	5.5	2.168	8.74078	-3.782	0.0227771	0.102661	0.0222698	0.00228625		84	23.3333	70	3	128.333	5.5	4.961	142.736	-0.989	0.371948	0.00695718	0.27111	0.00188616	0.00040009
85	23.6111	70.8333	3	129.861	5.5	2.236	9.35583	-3.78483	0.0227126	0.0965639	0.0222082	0.00214452		85	23.6111	70.8333	3	129.861	5.5	5.029	152.78	-0.991833	0.370896	0.00650279	0.27055	0.00175933	0.000385185
86	23.8889	71.6667	3	131.389	5.5	2.304	10.0142	-3.78767	0.0226484	0.0907922	0.0221468	0.00201076		86	23.8889	71.6667	3	131.389	5.5	5.097	163.531	-0.994667	0.369847	0.0060779	0.269991	0.00164098	0.000369777
87	24.1667	72.5	3	132.917	5.5	2.372	10.7188	-3.7905	0.0225843	0.0853329	0.0220855	0.00188462		87	24.1667	72.5	3	132.917	5.5	5.165	175.037	-0.9975	0.3688	0.00568061	0.269433	0.00153054	0.000354077
88	24.4444	73.3333	3	134.444	5.5	2.44	11.473	-3.79333	0.0225204	0.0801729	0.0220244	0.00176576		88	24.4444	73.3333	3	134.444	5.5	5.233	187.354	-1.00033	0.367757	0.00530915	0.268876	0.0014275	0.000338258
89	24.7222	74.1667	3	135.972	5.5	2.508	12.2803	-3.79617	0.0224567	0.0752992	0.0219635	0.00165383		89	24.7222	74.1667	3	135.972	5.5	5.301	200.537	-1.00317	0.366716	0.00496186	0.268319	0.00133136	0.000322469
90	25	75	3	137.5	5.5	2.576	13.1445	-3.799	0.0223932	0.0706991	0.0219027	0.0015485		90	25	75	3	137.5	5.5	5.369	214.648	-1.006	0.365679	0.00463718	0.267763	0.00124167	0.000306832
91	25.2778	75.8333	3	139.028	5.5	2.644	14.0694	-3.80183	0.0223298	0.0663598	0.0218421	0.00144943		91	25.2778	75.8333	3	139.028	5.5	5.437	229.752	-1.00883	0.364644	0.00433366	0.267208	0.00115799	0.000291445
92	25.5556	76.6667	3	140.556	5.5	2.712	15.0594	-3.80467	0.0222666	0.062269	0.0217816	0.00135632		92	25.5556	76.6667	3	140.556	5.5	5.505	245.918	-1.01167	0.363612	0.00404992	0.266654	0.00107993	0.000276392
93	25.8333	77.5	3	142.083	5.5	2.78	16.119	-3.8075	0.0222036	0.0584146	0.0217213	0.00126884		93	25.8333	77.5	3	142.083	5.5	5.573	263.223	-1.0145	0.362584	0.00378469	0.2661	0.00100711	0.000261736
94	26.1111	78.3333	3	143.611	5.5	2.848	17.2532	-3.81033	0.0221408	0.0547848	0.0216612	0.0011867		94	26.1111	78.3333	3	143.611	5.5	5.641	281.744	-1.01733	0.361558	0.00353676	0.265547	0.000939178	0.000247527
95	26.3889	79.1667	3	145.139	5.5	2.916	18.4673	-3.81317	0.0220782	0.0513683	0.0216012	0.00110962		95	26.3889	79.1667	3	145.139	5.5	5.709	301.569	-1.02017	0.360535	0.00330503	0.264995	0.000875816	0.000233803
96	26.6667	80	3	146.667	5.5	2.984	19.7667	-3.816	0.0220157	0.048154	0.0215414	0.00103731		96	26.6667	80	3	146.667	5.5	5.777	322.789	-1.023	0.359515	0.00308843	0.264443	0.000816714	0.000220591
97	26.9444	80.8333	3	148.194	5.5	3.052	21.1576	-3.81883	0.0219534	0.0451312	0.0214818	0.0009695		97	26.9444	80.8333	3	148.194	5.5	5.845	345.503	-1.02583	0.358498	0.00288598	0.263893	0.000761589	0.00020791
98	27.2222	81.6667	3	149.722	5.5	3.12	22.6464	-3.82167	0.0218913	0.0422898	0.0214223	0.000905945		98	27.2222	81.6667	3	149.722	5.5	5.913	369.814	-1.02867	0.357483	0.00269677	0.263343	0.000710175	0.00019577
99	27.5	82.5	3	151.25	5.5	3.188	24.2399	-3.8245	0.0218293	0.0396198	0.021363	0.000846398		99	27.5	82.5	3	151.25	5.5	5.981	395.836	-1.0315	0.356472	0.00251993	0.262793	0.000662222	0.000184177
100	27.7778	83.3333	3	152.778	5.5	3.256	25.9455	-3.82733	0.0217676	0.0371119	0.0213039	0.000790626		100	27.7778	83.3333	3	152.778	5.5	6.049	423.689	-1.03433	0.355463	0.00235466	0.262245	0.000617498	0.000173128
Front vehicle to stop line=3.0s；H=3s
黄灯启亮时的速度_decision speed（km/h）	decision speed(m/s)	Estimated Distance to Stop Line_leading	Front vehicle to stop line	Estimated Distance to Stop Line_following	Following vehicle to Stop Line_following	logit（p）_leading	EXP_leading	logit（p）_following	EXP_following	P(stop)_leading	P(cross)_following	Probablity(rear-end)		黄灯启亮时的速度_decision speed（km/h）	decision speed(m/s)	Estimated Distance to Stop Line	Front vehicle to stop line	Estimated Distance to Stop Line_following	Following vehicle to Stop Line_following	logit（p）_leading	EXP_leading	logit（p）_following	EXP_following	P(stop)_leading	P(cross)_following	Probablity(rear-end)	Increased Crash Probability
1	0.277778	0.833333	3	1.66667	6	-3.476	0.0309309	-3.561	0.0284104	0.969997	0.0276255	0.0267967		1	0.277778	0.833333	3	1.66667	6	-0.683	0.505099	-0.768	0.46394	0.664408	0.316912	0.210559	-0.183762
2	0.555556	1.66667	3	3.33333	6	-3.408	0.0331073	-3.578	0.0279315	0.967954	0.0271725	0.0263018		2	0.555556	1.66667	3	3.33333	6	-0.615	0.540641	-0.785	0.45612	0.649081	0.313243	0.20332	-0.177018
3	0.833333	2.5	3	5	6	-3.34	0.035437	-3.595	0.0274607	0.965776	0.0267267	0.025812		3	0.833333	2.5	3	5	6	-0.547	0.578683	-0.802	0.448431	0.633439	0.309598	0.196111	-0.170299
4	1.11111	3.33333	3	6.66667	6	-3.272	0.0379305	-3.612	0.0269978	0.963456	0.0262881	0.0253274		4	1.11111	3.33333	3	6.66667	6	-0.479	0.619402	-0.819	0.440872	0.617512	0.305976	0.188944	-0.163616
5	1.38889	4.16667	3	8.33333	6	-3.204	0.0405995	-3.629	0.0265427	0.960985	0.0258564	0.0248476		5	1.38889	4.16667	3	8.33333	6	-0.411	0.662987	-0.836	0.433441	0.601328	0.302378	0.181828	-0.156981
6	1.66667	5	3	10	6	-3.136	0.0434563	-3.646	0.0260953	0.958354	0.0254317	0.0243725		6	1.66667	5	3	10	6	-0.343	0.709638	-0.853	0.426135	0.584919	0.298804	0.174776	-0.150404
7	1.94444	5.83333	3	11.6667	6	-3.068	0.0465141	-3.663	0.0256554	0.955553	0.0250137	0.0239019		7	1.94444	5.83333	3	11.6667	6	-0.275	0.759572	-0.87	0.418952	0.56832	0.295254	0.167799	-0.143897
8	2.22222	6.66667	3	13.3333	6	-3	0.0497871	-3.68	0.025223	0.952574	0.0246024	0.0234356		8	2.22222	6.66667	3	13.3333	6	-0.207	0.81302	-0.887	0.41189	0.551566	0.291729	0.160908	-0.137472
9	2.5	7.5	3	15	6	-2.932	0.0532904	-3.697	0.0247978	0.949406	0.0241978	0.0229735		9	2.5	7.5	3	15	6	-0.139	0.870228	-0.904	0.404947	0.534694	0.288229	0.154114	-0.131141
10	2.77778	8.33333	3	16.6667	6	-2.864	0.0570401	-3.714	0.0243798	0.946038	0.0237996	0.0225153		10	2.77778	8.33333	3	16.6667	6	-0.071	0.931462	-0.921	0.398121	0.517743	0.284754	0.147429	-0.124914
11	3.05556	9.16667	3	18.3333	6	-2.796	0.0610538	-3.731	0.0239689	0.942459	0.0234078	0.0220609		11	3.05556	9.16667	3	18.3333	6	-0.003	0.997004	-0.938	0.39141	0.50075	0.281305	0.140863	-0.118802
12	3.33333	10	3	20	6	-2.728	0.0653499	-3.748	0.0235648	0.938659	0.0230223	0.0216101		12	3.33333	10	3	20	6	0.065	1.06716	-0.955	0.384812	0.483756	0.27788	0.134426	-0.112816
13	3.61111	10.8333	3	21.6667	6	-2.66	0.0699482	-3.765	0.0231676	0.934625	0.022643	0.0211627		13	3.61111	10.8333	3	21.6667	6	0.133	1.14225	-0.972	0.378326	0.466799	0.274482	0.128128	-0.106965
14	3.88889	11.6667	3	23.3333	6	-2.592	0.0748701	-3.782	0.0227771	0.930345	0.0222698	0.0207186		14	3.88889	11.6667	3	23.3333	6	0.201	1.22262	-0.989	0.371948	0.449918	0.27111	0.121977	-0.101259
15	4.16667	12.5	3	25	6	-2.524	0.0801384	-3.799	0.0223932	0.925807	0.0219027	0.0202777		15	4.16667	12.5	3	25	6	0.269	1.30866	-1.006	0.365679	0.433153	0.267763	0.115982	-0.0957047
16	4.44444	13.3333	3	26.6667	6	-2.456	0.0857774	-3.816	0.0220157	0.920999	0.0215414	0.0198396		16	4.44444	13.3333	3	26.6667	6	0.337	1.40074	-1.023	0.359515	0.416538	0.264443	0.110151	-0.0903112
17	4.72222	14.1667	3	28.3333	6	-2.388	0.0918131	-3.833	0.0216446	0.915908	0.021186	0.0194044		17	4.72222	14.1667	3	28.3333	6	0.405	1.4993	-1.04	0.353455	0.400112	0.26115	0.104489	-0.0850847
18	5	15	3	30	6	-2.32	0.0982736	-3.85	0.0212797	0.91052	0.0208363	0.0189719		18	5	15	3	30	6	0.473	1.6048	-1.057	0.347497	0.383906	0.257883	0.099003	-0.0800311
19	5.27778	15.8333	3	31.6667	6	-2.252	0.105189	-3.867	0.020921	0.904823	0.0204923	0.0185419		19	5.27778	15.8333	3	31.6667	6	0.541	1.71772	-1.074	0.341639	0.367955	0.254643	0.0936972	-0.0751553
20	5.55556	16.6667	3	33.3333	6	-2.184	0.11259	-3.884	0.0205684	0.898803	0.0201539	0.0181144		20	5.55556	16.6667	3	33.3333	6	0.609	1.83859	-1.091	0.33588	0.352287	0.25143	0.0885756	-0.0704613
21	5.83333	17.5	3	35	6	-2.116	0.120513	-3.901	0.0202217	0.892449	0.0198209	0.0176891		21	5.83333	17.5	3	35	6	0.677	1.96796	-1.108	0.330219	0.336931	0.248244	0.0836411	-0.065952
22	6.11111	18.3333	3	36.6667	6	-2.048	0.128993	-3.918	0.0198808	0.885745	0.0194933	0.0172661		22	6.11111	18.3333	3	36.6667	6	0.745	2.10644	-1.125	0.324652	0.321912	0.245085	0.0788957	-0.0616297
23	6.38889	19.1667	3	38.3333	6	-1.98	0.138069	-3.935	0.0195457	0.878681	0.019171	0.0168452		23	6.38889	19.1667	3	38.3333	6	0.813	2.25466	-1.142	0.31918	0.307252	0.241953	0.0743405	-0.0574954
24	6.66667	20	3	40	6	-1.912	0.147785	-3.952	0.0192162	0.871244	0.0188539	0.0164264		24	6.66667	20	3	40	6	0.881	2.41331	-1.159	0.3138	0.292971	0.238849	0.0699757	-0.0535494
25	6.94444	20.8333	3	41.6667	6	-1.844	0.158183	-3.969	0.0188923	0.863421	0.018542	0.0160096		25	6.94444	20.8333	3	41.6667	6	0.949	2.58313	-1.176	0.30851	0.279086	0.235772	0.0658007	-0.0497911
26	7.22222	21.6667	3	43.3333	6	-1.776	0.169314	-3.986	0.0185739	0.855202	0.0182352	0.0155948		26	7.22222	21.6667	3	43.3333	6	1.017	2.76489	-1.193	0.30331	0.265612	0.232723	0.061814	-0.0462193
27	7.5	22.5	3	45	6	-1.708	0.181228	-4.003	0.0182608	0.846577	0.0179333	0.0151819		27	7.5	22.5	3	45	6	1.085	2.95944	-1.21	0.298197	0.252561	0.229701	0.0580135	-0.0428316
28	7.77778	23.3333	3	46.6667	6	-1.64	0.19398	-4.02	0.017953	0.837535	0.0176363	0.0147711		28	7.77778	23.3333	3	46.6667	6	1.153	3.16768	-1.227	0.293171	0.239942	0.226707	0.0543964	-0.0396254
29	8.05556	24.1667	3	48.3333	6	-1.572	0.20763	-4.037	0.0176503	0.828069	0.0173442	0.0143622		29	8.05556	24.1667	3	48.3333	6	1.221	3.39058	-1.244	0.288229	0.227761	0.22374	0.0509593	-0.0365971
30	8.33333	25	3	50	6	-1.504	0.222239	-4.054	0.0173528	0.81817	0.0170568	0.0139554		30	8.33333	25	3	50	6	1.289	3.62916	-1.261	0.283371	0.216022	0.220802	0.0476981	-0.0337427
31	8.61111	25.8333	3	51.6667	6	-1.436	0.237877	-4.071	0.0170603	0.807834	0.0167741	0.0135507		31	8.61111	25.8333	3	51.6667	6	1.357	3.88452	-1.278	0.278594	0.204728	0.217891	0.0446084	-0.0310577
32	8.88889	26.6667	3	53.3333	6	-1.368	0.254616	-4.088	0.0167727	0.797057	0.0164961	0.0131483		32	8.88889	26.6667	3	53.3333	6	1.425	4.15786	-1.295	0.273898	0.193879	0.215008	0.0416855	-0.0285372
33	9.16667	27.5	3	55	6	-1.3	0.272532	-4.105	0.01649	0.785835	0.0162225	0.0127482		33	9.16667	27.5	3	55	6	1.493	4.45043	-1.312	0.269281	0.183472	0.212152	0.038924	-0.0261758
34	9.44444	28.3333	3	56.6667	6	-1.232	0.291709	-4.122	0.0162121	0.774168	0.0159534	0.0123506		34	9.44444	28.3333	3	56.6667	6	1.561	4.76358	-1.329	0.264742	0.173503	0.209325	0.0363185	-0.0239679
35	9.72222	29.1667	3	58.3333	6	-1.164	0.312235	-4.139	0.0159388	0.762059	0.0156887	0.0119557		35	9.72222	29.1667	3	58.3333	6	1.629	5.09877	-1.346	0.260279	0.163967	0.206525	0.0338634	-0.0219077
36	10	30	3	60	6	-1.096	0.334205	-4.156	0.0156701	0.74951	0.0154283	0.0115637		36	10	30	3	60	6	1.697	5.45755	-1.363	0.255892	0.154857	0.203753	0.0315527	-0.019989
37	10.2778	30.8333	3	61.6667	6	-1.028	0.357722	-4.173	0.015406	0.736528	0.0151722	0.0111748		37	10.2778	30.8333	3	61.6667	6	1.765	5.84157	-1.38	0.251579	0.146165	0.201009	0.0293805	-0.0182058
38	10.5556	31.6667	3	63.3333	6	-0.96	0.382893	-4.19	0.0151463	0.723122	0.0149203	0.0107892		38	10.5556	31.6667	3	63.3333	6	1.833	6.25262	-1.397	0.247338	0.137881	0.198293	0.0273408	-0.0165516
39	10.8333	32.5	3	65	6	-0.892	0.409835	-4.207	0.014891	0.709303	0.0146725	0.0104072		39	10.8333	32.5	3	65	6	1.901	6.69258	-1.414	0.243169	0.129995	0.195604	0.0254276	-0.0150204
40	11.1111	33.3333	3	66.6667	6	-0.824	0.438673	-4.224	0.01464	0.695085	0.0144287	0.0100292		40	11.1111	33.3333	3	66.6667	6	1.969	7.16351	-1.431	0.23907	0.122496	0.192943	0.0236348	-0.0136056
41	11.3889	34.1667	3	68.3333	6	-0.756	0.469541	-4.241	0.0143932	0.680485	0.014189	0.00965537		41	11.3889	34.1667	3	68.3333	6	2.037	7.66757	-1.448	0.23504	0.115373	0.19031	0.0219565	-0.0123011
42	11.6667	35	3	70	6	-0.688	0.50258	-4.258	0.0141506	0.665522	0.0139531	0.00928611		42	11.6667	35	3	70	6	2.105	8.2071	-1.465	0.231078	0.108612	0.187704	0.0203868	-0.0111007
43	11.9444	35.8333	3	71.6667	6	-0.62	0.537944	-4.275	0.013912	0.650219	0.0137212	0.00892175		43	11.9444	35.8333	3	71.6667	6	2.173	8.7846	-1.482	0.227183	0.102201	0.185126	0.0189201	-0.00999834
44	12.2222	36.6667	3	73.3333	6	-0.552	0.575797	-4.292	0.0136775	0.634599	0.013493	0.00856265		44	12.2222	36.6667	3	73.3333	6	2.241	9.40273	-1.499	0.223353	0.0961286	0.182575	0.0175507	-0.00898801
45	12.5	37.5	3	75	6	-0.484	0.616313	-4.309	0.013447	0.618692	0.0132686	0.00820916		45	12.5	37.5	3	75	6	2.309	10.0644	-1.516	0.219588	0.0903803	0.180051	0.0162731	-0.00806394
46	12.7778	38.3333	3	76.6667	6	-0.416	0.65968	-4.326	0.0132203	0.602526	0.0130478	0.00786165		46	12.7778	38.3333	3	76.6667	6	2.377	10.7725	-1.533	0.215887	0.0849435	0.177555	0.0150822	-0.0072205
47	13.0556	39.1667	3	78.3333	6	-0.348	0.706099	-4.343	0.0129975	0.586133	0.0128307	0.0075205		47	13.0556	39.1667	3	78.3333	6	2.445	11.5305	-1.55	0.212248	0.079805	0.175086	0.0139728	-0.00645226
48	13.3333	40	3	80	6	-0.28	0.755784	-4.36	0.0127784	0.569546	0.0126172	0.00718606		48	13.3333	40	3	80	6	2.513	12.3419	-1.567	0.20867	0.0749518	0.172644	0.01294	-0.00575397
49	13.6111	40.8333	3	81.6667	6	-0.212	0.808965	-4.377	0.012563	0.552802	0.0124071	0.00685869		49	13.6111	40.8333	3	81.6667	6	2.581	13.2103	-1.584	0.205153	0.0703713	0.17023	0.0119793	-0.0051206
50	13.8889	41.6667	3	83.3333	6	-0.144	0.865888	-4.394	0.0123512	0.535938	0.0122005	0.00653873		50	13.8889	41.6667	3	83.3333	6	2.649	14.1399	-1.601	0.201695	0.0660507	0.167842	0.0110861	-0.00454734
51	14.1667	42.5	3	85	6	-0.076	0.926816	-4.411	0.012143	0.518991	0.0119973	0.00622651		51	14.1667	42.5	3	85	6	2.717	15.1348	-1.618	0.198295	0.0619776	0.165481	0.0102561	-0.0040296
52	14.4444	43.3333	3	86.6667	6	-0.008	0.992032	-4.428	0.0119383	0.502	0.0117975	0.00592234		52	14.4444	43.3333	3	86.6667	6	2.785	16.1998	-1.635	0.194952	0.0581402	0.163147	0.00948537	-0.00356302
53	14.7222	44.1667	3	88.3333	6	0.06	1.06184	-4.445	0.0117371	0.485004	0.0116009	0.00562651		53	14.7222	44.1667	3	88.3333	6	2.853	17.3397	-1.652	0.191666	0.0545265	0.160839	0.00876997	-0.00314346
54	15	45	3	90	6	0.128	1.13655	-4.462	0.0115393	0.468044	0.0114076	0.00533927		54	15	45	3	90	6	2.921	18.5598	-1.669	0.188435	0.0511252	0.158558	0.00810628	-0.00276701
55	15.2778	45.8333	3	91.6667	6	0.196	1.21653	-4.479	0.0113448	0.451156	0.0112175	0.00506084		55	15.2778	45.8333	3	91.6667	6	2.989	19.8658	-1.686	0.185259	0.0479253	0.156303	0.00749085	-0.00243001
56	15.5556	46.6667	3	93.3333	6	0.264	1.30213	-4.496	0.0111535	0.434381	0.0110305	0.00479143		56	15.5556	46.6667	3	93.3333	6	3.057	21.2637	-1.703	0.182136	0.0449162	0.154074	0.00692042	-0.00212898
57	15.8333	47.5	3	95	6	0.332	1.39375	-4.513	0.0109655	0.417754	0.0108466	0.0045312		57	15.8333	47.5	3	95	6	3.125	22.7599	-1.72	0.179066	0.0420877	0.151871	0.00639191	-0.00186071
58	16.1111	48.3333	3	96.6667	6	0.4	1.49182	-4.53	0.0107807	0.401312	0.0106657	0.00428027		58	16.1111	48.3333	3	96.6667	6	3.193	24.3614	-1.737	0.176048	0.03943	0.149694	0.00590245	-0.00162218
59	16.3889	49.1667	3	98.3333	6	0.468	1.5968	-4.547	0.010599	0.38509	0.0104878	0.00403874		59	16.3889	49.1667	3	98.3333	6	3.261	26.0756	-1.754	0.17308	0.0369336	0.147543	0.00544931	-0.00141057
60	16.6667	50	3	100	6	0.536	1.70916	-4.564	0.0104203	0.369119	0.0103128	0.00380666		60	16.6667	50	3	100	6	3.329	27.9104	-1.771	0.170163	0.0345896	0.145418	0.00502995	-0.00122329
61	16.9444	50.8333	3	101.667	6	0.604	1.82942	-4.581	0.0102446	0.353429	0.0101408	0.00358404		61	16.9444	50.8333	3	101.667	6	3.397	29.8743	-1.788	0.167294	0.0323894	0.143318	0.00464198	-0.00105794
62	17.2222	51.6667	3	103.333	6	0.672	1.95815	-4.598	0.010072	0.338049	0.00997153	0.00337087		62	17.2222	51.6667	3	103.333	6	3.465	31.9765	-1.805	0.164474	0.0303247	0.141244	0.00428316	-0.000912295
63	17.5	52.5	3	105	6	0.74	2.09594	-4.615	0.00990218	0.323004	0.00980509	0.00316709		63	17.5	52.5	3	105	6	3.533	34.2265	-1.822	0.161702	0.0283877	0.139194	0.0039514	-0.000784318
64	17.7778	53.3333	3	106.667	6	0.808	2.24342	-4.632	0.00973527	0.308317	0.00964141	0.00297261		64	17.7778	53.3333	3	106.667	6	3.601	36.6349	-1.839	0.158976	0.0265711	0.13717	0.00364475	-0.000672141
65	18.0556	54.1667	3	108.333	6	0.876	2.40128	-4.649	0.00957117	0.294007	0.00948043	0.00278732		65	18.0556	54.1667	3	108.333	6	3.669	39.2127	-1.856	0.156297	0.0248678	0.13517	0.00336138	-0.000574061
66	18.3333	55	3	110	6	0.944	2.57024	-4.666	0.00940983	0.280093	0.00932211	0.00261106		66	18.3333	55	3	110	6	3.737	41.9719	-1.873	0.153662	0.023271	0.133195	0.00309958	-0.000488525	66km/h
67	18.6111	55.8333	3	111.667	6	1.012	2.7511	-4.683	0.00925122	0.266589	0.00916642	0.00244366		67	18.6111	55.8333	3	111.667	6	3.805	44.9253	-1.89	0.151072	0.0217745	0.131244	0.00285778	-0.000414122
68	18.8889	56.6667	3	113.333	6	1.08	2.94468	-4.7	0.00909528	0.253506	0.0090133	0.00228493		68	18.8889	56.6667	3	113.333	6	3.873	48.0864	-1.907	0.148525	0.0203722	0.129318	0.0026345	-0.000349576
69	19.1667	57.5	3	115	6	1.148	3.15188	-4.717	0.00894196	0.240855	0.00886271	0.00213463		69	19.1667	57.5	3	115	6	3.941	51.47	-1.924	0.146022	0.0190585	0.127416	0.00242836	-0.000293735
70	19.4444	58.3333	3	116.667	6	1.216	3.37367	-4.734	0.00879124	0.228641	0.00871462	0.00199252		70	19.4444	58.3333	3	116.667	6	4.009	55.0918	-1.941	0.14356	0.0178279	0.125538	0.00223808	-0.000245562
71	19.7222	59.1667	3	118.333	6	1.284	3.61106	-4.751	0.00864305	0.21687	0.00856899	0.00185836		71	19.7222	59.1667	3	118.333	6	4.077	58.9683	-1.958	0.14114	0.0166755	0.123684	0.00206248	-0.000204127
72	20	60	3	120	6	1.352	3.86515	-4.768	0.00849736	0.205544	0.00842576	0.00173186		72	20	60	3	120	6	4.145	63.1176	-1.975	0.138761	0.0155963	0.121853	0.00190046	-0.000168597
73	20.2778	60.8333	3	121.667	6	1.42	4.13712	-4.785	0.00835412	0.194662	0.00828491	0.00161275		73	20.2778	60.8333	3	121.667	6	4.213	67.5589	-1.992	0.136422	0.014586	0.120045	0.00175098	-0.000138228
74	20.5556	61.6667	3	123.333	6	1.488	4.42823	-4.802	0.0082133	0.184222	0.0081464	0.00150075		74	20.5556	61.6667	3	123.333	6	4.281	72.3127	-2.009	0.134123	0.0136402	0.118261	0.00161311	-0.00011236
75	20.8333	62.5	3	125	6	1.556	4.73982	-4.819	0.00807486	0.174221	0.00801018	0.00139554		75	20.8333	62.5	3	125	6	4.349	77.401	-2.026	0.131862	0.0127549	0.1165	0.00148595	-9.0406e-05
76	21.1111	63.3333	3	126.667	6	1.624	5.07334	-4.836	0.00793875	0.164654	0.00787622	0.00129685		76	21.1111	63.3333	3	126.667	6	4.417	82.8474	-2.043	0.129639	0.0119264	0.114762	0.0013687	-7.1846e-05
77	21.3889	64.1667	3	128.333	6	1.692	5.43033	-4.853	0.00780493	0.155513	0.00774448	0.00120437		77	21.3889	64.1667	3	128.333	6	4.485	88.677	-2.06	0.127454	0.0111511	0.113046	0.00126059	-5.62219e-05
78	21.6667	65	3	130	6	1.76	5.81244	-4.87	0.00767337	0.14679	0.00761493	0.0011178		78	21.6667	65	3	130	6	4.553	94.9167	-2.077	0.125306	0.0104257	0.111352	0.00116093	-4.313e-05
79	21.9444	65.8333	3	131.667	6	1.828	6.22143	-4.887	0.00754402	0.138477	0.00748753	0.00103685		79	21.9444	65.8333	3	131.667	6	4.621	101.596	-2.094	0.123193	0.00974701	0.109681	0.00106907	-3.22161e-05
80	22.2222	66.6667	3	133.333	6	1.896	6.6592	-4.904	0.00741686	0.130562	0.00736225	0.000961229		80	22.2222	66.6667	3	133.333	6	4.689	108.744	-2.111	0.121117	0.00911208	0.108032	0.000984399	-2.31698e-05
81	22.5	67.5	3	135	6	1.964	7.12778	-4.921	0.00729184	0.123035	0.00723905	0.000890655		81	22.5	67.5	3	135	6	4.757	116.396	-2.128	0.119075	0.00851816	0.106405	0.000906375	-1.57201e-05
82	22.7778	68.3333	3	136.667	6	2.032	7.62933	-4.938	0.00716892	0.115884	0.00711789	0.000824849		82	22.7778	68.3333	3	136.667	6	4.825	124.586	-2.145	0.117068	0.00796264	0.104799	0.00083448	-9.63084e-06
83	23.0556	69.1667	3	138.333	6	2.1	8.16617	-4.955	0.00704808	0.109097	0.00699875	0.000763542		83	23.0556	69.1667	3	138.333	6	4.893	133.353	-2.162	0.115095	0.00744308	0.103215	0.000768239	-4.69691e-06
84	23.3333	70	3	140	6	2.168	8.74078	-4.972	0.00692928	0.102661	0.00688159	0.000706472		84	23.3333	70	3	140	6	4.961	142.736	-2.179	0.113155	0.00695718	0.101652	0.000707212	-7.4049e-07
85	23.6111	70.8333	3	141.667	6	2.236	9.35583	-4.989	0.00681247	0.0965639	0.00676638	0.000653388		85	23.6111	70.8333	3	141.667	6	5.029	152.78	-2.196	0.111247	0.00650279	0.10011	0.000650996	2.39208e-06
86	23.8889	71.6667	3	143.333	6	2.304	10.0142	-5.006	0.00669764	0.0907922	0.00665308	0.000604048		86	23.8889	71.6667	3	143.333	6	5.097	163.531	-2.213	0.109372	0.0060779	0.0985891	0.000599215	4.83325e-06
87	24.1667	72.5	3	145	6	2.372	10.7188	-5.023	0.00658474	0.0853329	0.00654167	0.00055822		87	24.1667	72.5	3	145	6	5.165	175.037	-2.23	0.107528	0.00568061	0.0970886	0.000551523	6.69689e-06
88	24.4444	73.3333	3	146.667	6	2.44	11.473	-5.04	0.00647375	0.0801729	0.00643211	0.000515681		88	24.4444	73.3333	3	146.667	6	5.233	187.354	-2.247	0.105716	0.00530915	0.0956086	0.0005076	8.0806e-06
89	24.7222	74.1667	3	148.333	6	2.508	12.2803	-5.057	0.00636462	0.0752992	0.00632437	0.000476221		89	24.7222	74.1667	3	148.333	6	5.301	200.537	-2.264	0.103934	0.00496186	0.0941487	0.000467153	9.06777e-06
90	25	75	3	150	6	2.576	13.1445	-5.074	0.00625734	0.0706991	0.00621843	0.000439637		90	25	75	3	150	6	5.369	214.648	-2.281	0.102182	0.00463718	0.0927088	0.000429908	9.72949e-06
91	25.2778	75.8333	3	151.667	6	2.644	14.0694	-5.091	0.00615186	0.0663598	0.00611425	0.00040574		91	25.2778	75.8333	3	151.667	6	5.437	229.752	-2.298	0.10046	0.00433366	0.0912887	0.000395614	1.01261e-05
92	25.5556	76.6667	3	153.333	6	2.712	15.0594	-5.108	0.00604817	0.062269	0.00601181	0.000374349		92	25.5556	76.6667	3	153.333	6	5.505	245.918	-2.315	0.0987662	0.00404992	0.0898883	0.00036404	1.03087e-05
93	25.8333	77.5	3	155	6	2.78	16.119	-5.125	0.00594622	0.0584146	0.00591107	0.000345292		93	25.8333	77.5	3	155	6	5.573	263.223	-2.332	0.0971014	0.00378469	0.0885072	0.000334972	1.03204e-05
94	26.1111	78.3333	3	156.667	6	2.848	17.2532	-5.142	0.00584599	0.0547848	0.00581201	0.00031841		94	26.1111	78.3333	3	156.667	6	5.641	281.744	-2.349	0.0954646	0.00353676	0.0871453	0.000308212	1.01974e-05
95	26.3889	79.1667	3	158.333	6	2.916	18.4673	-5.159	0.00574744	0.0513683	0.0057146	0.000293549		95	26.3889	79.1667	3	158.333	6	5.709	301.569	-2.366	0.0938554	0.00330503	0.0858024	0.000283579	9.96988e-06
96	26.6667	80	3	160	6	2.984	19.7667	-5.176	0.00565056	0.048154	0.00561881	0.000270568		96	26.6667	80	3	160	6	5.777	322.789	-2.383	0.0922733	0.00308843	0.0844783	0.000260905	9.66317e-06
97	26.9444	80.8333	3	161.667	6	3.052	21.1576	-5.193	0.00555532	0.0451312	0.00552462	0.000249333		97	26.9444	80.8333	3	161.667	6	5.845	345.503	-2.4	0.090718	0.00288598	0.0831727	0.000240035	9.2981e-06
98	27.2222	81.6667	3	163.333	6	3.12	22.6464	-5.21	0.00546167	0.0422898	0.00543201	0.000229718		98	27.2222	81.6667	3	163.333	6	5.913	369.814	-2.417	0.0891888	0.00269677	0.0818855	0.000220826	8.89187e-06
99	27.5	82.5	3	165	6	3.188	24.2399	-5.227	0.00536961	0.0396198	0.00534093	0.000211607		99	27.5	82.5	3	165	6	5.981	395.836	-2.434	0.0876854	0.00251993	0.0806165	0.000203148	8.45853e-06
100	27.7778	83.3333	3	166.667	6	3.256	25.9455	-5.244	0.0052791	0.0371119	0.00525138	0.000194888		100	27.7778	83.3333	3	166.667	6	6.049	423.689	-2.451	0.0862073	0.00235466	0.0793655	0.000186879	8.00951e-06
Front vehicle to stop line=1.0s；H=0.5s
黄灯启亮时的速度_decision speed（km/h）	decision speed(m/s)	Estimated Distance to Stop Line_leading	Front vehicle to stop line	Estimated Distance to Stop Line_following	Following vehicle to Stop Line_following	logit（p）_leading	EXP_leading	logit（p）_following	EXP_following	P(stop)_leading	P(cross)_following	Probablity(rear-end)		黄灯启亮时的速度_decision speed（km/h）	decision speed(m/s)	Estimated Distance to Stop Line	Front vehicle to stop line	Estimated Distance to Stop Line_following	Following vehicle to Stop Line_following	logit（p）_leading	EXP_leading	logit（p）_following	EXP_following	P(stop)_leading	P(cross)_following	Probablity(rear-end)	Increased Crash Probability
1	0.277778	0.277778	1	0.416667	1.5	-3.41933	0.0327343	-3.4335	0.0322738	0.968303	0.0312648	0.0302738		1	0.277778	0.277778	1	0.416667	1.5	-0.626333	0.534548	-0.6405	0.527029	0.651658	0.345134	0.224909	-0.194635
2	0.555556	0.555556	1	0.833333	1.5	-3.29467	0.0370804	-3.323	0.0360445	0.964245	0.0347905	0.0335466		2	0.555556	0.555556	1	0.833333	1.5	-0.501667	0.605521	-0.53	0.588605	0.622851	0.370517	0.230777	-0.19723
3	0.833333	0.833333	1	1.25	1.5	-3.17	0.0420036	-3.2125	0.0402558	0.95969	0.038698	0.0371381		3	0.833333	0.833333	1	1.25	1.5	-0.377	0.685916	-0.4195	0.657375	0.593149	0.396636	0.235265	-0.198127
4	1.11111	1.11111	1	1.66667	1.5	-3.04533	0.0475804	-3.102	0.0449592	0.954581	0.0430248	0.0410707		4	1.11111	1.11111	1	1.66667	1.5	-0.252333	0.776986	-0.309	0.734181	0.562751	0.423359	0.238245	-0.197175
5	1.38889	1.38889	1	2.08333	1.5	-2.92067	0.0538977	-2.9915	0.0502121	0.948859	0.0478114	0.0453662		5	1.38889	1.38889	1	2.08333	1.5	-0.127667	0.880147	-0.1985	0.81996	0.531873	0.450537	0.239629	-0.194263
6	1.66667	1.66667	1	2.5	1.5	-2.796	0.0610538	-2.881	0.0560787	0.942459	0.0531008	0.0500454		6	1.66667	1.66667	1	2.5	1.5	-0.003	0.997004	-0.088	0.915761	0.50075	0.478014	0.239366	-0.18932
7	1.94444	1.94444	1	2.91667	1.5	-2.67133	0.06916	-2.7705	0.0626307	0.935314	0.0589393	0.0551267		7	1.94444	1.94444	1	2.91667	1.5	0.121667	1.12938	0.0225	1.02276	0.469621	0.505625	0.237452	-0.182325
8	2.22222	2.22222	1	3.33333	1.5	-2.54667	0.0783424	-2.66	0.0699482	0.927349	0.0653753	0.0606258		8	2.22222	2.22222	1	3.33333	1.5	0.246333	1.27933	0.133	1.14225	0.438726	0.533201	0.233929	-0.173304
9	2.5	2.5	1	3.75	1.5	-2.422	0.088744	-2.5495	0.0781207	0.91849	0.0724601	0.0665538		9	2.5	2.5	1	3.75	1.5	0.371	1.44918	0.2435	1.27571	0.408299	0.560576	0.228883	-0.162329
10	2.77778	2.77778	1	4.16667	1.5	-2.29733	0.100527	-2.439	0.0872481	0.908656	0.0802467	0.0729166		10	2.77778	2.77778	1	4.16667	1.5	0.495667	1.64159	0.354	1.42476	0.37856	0.587587	0.222437	-0.14952
11	3.05556	3.05556	1	4.58333	1.5	-2.17267	0.113874	-2.3285	0.0974418	0.897768	0.0887899	0.0797128		11	3.05556	3.05556	1	4.58333	1.5	0.620333	1.85955	0.4645	1.59122	0.349706	0.614081	0.214748	-0.135035
12	3.33333	3.33333	1	5	1.5	-2.048	0.128993	-2.218	0.108827	0.885745	0.0981457	0.0869321		12	3.33333	3.33333	1	5	1.5	0.745	2.10644	0.575	1.77713	0.321912	0.639916	0.205997	-0.119064
13	3.61111	3.61111	1	5.41667	1.5	-1.92333	0.146119	-2.1075	0.121541	0.87251	0.10837	0.0945539		13	3.61111	3.61111	1	5.41667	1.5	0.869667	2.38612	0.6855	1.98476	0.295324	0.664965	0.19638	-0.101826
14	3.88889	3.88889	1	5.83333	1.5	-1.79867	0.165519	-1.997	0.135742	0.857987	0.119518	0.102545		14	3.88889	3.88889	1	5.83333	1.5	0.994333	2.70292	0.796	2.21666	0.270057	0.689118	0.186101	-0.0835561
15	4.16667	4.16667	1	6.25	1.5	-1.674	0.187496	-1.8865	0.151601	0.842108	0.131644	0.110859		15	4.16667	4.16667	1	6.25	1.5	1.119	3.06179	0.9065	2.47564	0.246197	0.712283	0.175362	-0.0645034
16	4.44444	4.44444	1	6.66667	1.5	-1.54933	0.21239	-1.776	0.169314	0.824817	0.144798	0.119432		16	4.44444	4.44444	1	6.66667	1.5	1.24367	3.46831	1.017	2.76489	0.223798	0.734388	0.164355	-0.0449231
17	4.72222	4.72222	1	7.08333	1.5	-1.42467	0.240589	-1.6655	0.189096	0.806069	0.159025	0.128185		17	4.72222	4.72222	1	7.08333	1.5	1.36833	3.9288	1.1275	3.08793	0.202889	0.755377	0.153258	-0.0250728
18	5	5	1	7.5	1.5	-1.3	0.272532	-1.555	0.211189	0.785835	0.174365	0.137022		18	5	5	1	7.5	1.5	1.493	4.45043	1.238	3.44871	0.183472	0.775216	0.14223	-0.00520793	18km/h
19	5.27778	5.27778	1	7.91667	1.5	-1.17533	0.308716	-1.4445	0.235864	0.764108	0.190849	0.14583		19	5.27778	5.27778	1	7.91667	1.5	1.61767	5.04131	1.3485	3.85164	0.165527	0.793884	0.131409	0.0144203
20	5.55556	5.55556	1	8.33333	1.5	-1.05067	0.349705	-1.334	0.263421	0.740903	0.208498	0.154477		20	5.55556	5.55556	1	8.33333	1.5	1.74233	5.71065	1.459	4.30166	0.149017	0.81138	0.120909	0.0335679
21	5.83333	5.83333	1	8.75	1.5	-0.926	0.396135	-1.2235	0.294199	0.716263	0.227321	0.162822		21	5.83333	5.83333	1	8.75	1.5	1.867	6.46886	1.5695	4.80425	0.133889	0.827712	0.110822	0.0519999
22	6.11111	6.11111	1	9.16667	1.5	-0.801333	0.44873	-1.113	0.328572	0.69026	0.247312	0.17071		22	6.11111	6.11111	1	9.16667	1.5	1.99167	7.32774	1.68	5.36556	0.120081	0.842905	0.101217	0.069493
23	6.38889	6.38889	1	9.58333	1.5	-0.676667	0.508309	-1.0025	0.366961	0.662994	0.26845	0.177981		23	6.38889	6.38889	1	9.58333	1.5	2.11633	8.30065	1.7905	5.99245	0.107519	0.856989	0.0921429	0.085838
24	6.66667	6.66667	1	10	1.5	-0.552	0.575797	-0.892	0.409835	0.634599	0.290697	0.184476		24	6.66667	6.66667	1	10	1.5	2.241	9.40273	1.901	6.69258	0.0961286	0.870005	0.0836323	0.100844
25	6.94444	6.94444	1	10.4167	1.5	-0.427333	0.652246	-0.7815	0.457719	0.605237	0.313997	0.190042		25	6.94444	6.94444	1	10.4167	1.5	2.36567	10.6511	2.0115	7.47452	0.0858285	0.881999	0.0757007	0.114342
26	7.22222	7.22222	1	10.8333	1.5	-0.302667	0.738845	-0.671	0.511197	0.575094	0.338273	0.194539		26	7.22222	7.22222	1	10.8333	1.5	2.49033	12.0653	2.122	8.34782	0.0765386	0.893023	0.0683508	0.126188
27	7.5	7.5	1	11.25	1.5	-0.178	0.836942	-0.5605	0.570924	0.544383	0.363432	0.197846		27	7.5	7.5	1	11.25	1.5	2.615	13.6672	2.2325	9.32314	0.0681793	0.90313	0.0615748	0.136271
28	7.77778	7.77778	1	11.6667	1.5	-0.0533333	0.948064	-0.45	0.637628	0.51333	0.389361	0.199871		28	7.77778	7.77778	1	11.6667	1.5	2.73967	15.4818	2.343	10.4124	0.0606729	0.912376	0.0553565	0.144514
29	8.05556	8.05556	1	12.0833	1.5	0.0713333	1.07394	-0.3395	0.712126	0.482174	0.415931	0.200551		29	8.05556	8.05556	1	12.0833	1.5	2.86433	17.5374	2.4535	11.629	0.0539451	0.920817	0.0496736	0.150878
30	8.33333	8.33333	1	12.5	1.5	0.196	1.21653	-0.229	0.795329	0.451156	0.442999	0.199862		30	8.33333	8.33333	1	12.5	1.5	2.989	19.8658	2.564	12.9877	0.0479253	0.928508	0.044499	0.155363
31	8.61111	8.61111	1	12.9167	1.5	0.320667	1.37805	-0.1185	0.888252	0.420513	0.47041	0.197813		31	8.61111	8.61111	1	12.9167	1.5	3.11367	22.5034	2.6745	14.5051	0.042547	0.935505	0.039803	0.158011
32	8.88889	8.88889	1	13.3333	1.5	0.445333	1.56101	-0.008	0.992032	0.390471	0.498	0.194455		32	8.88889	8.88889	1	13.3333	1.5	3.23833	25.4912	2.785	16.1998	0.0377484	0.94186	0.0355537	0.158901
33	9.16667	9.16667	1	13.75	1.5	0.57	1.76827	0.1025	1.10794	0.361237	0.525603	0.189867		33	9.16667	9.16667	1	13.75	1.5	3.363	28.8757	2.8955	18.0925	0.033472	0.947624	0.0317189	0.158148
34	9.44444	9.44444	1	14.1667	1.5	0.694667	2.00304	0.213	1.23738	0.332996	0.55305	0.184163		34	9.44444	9.44444	1	14.1667	1.5	3.48767	32.7095	3.006	20.2064	0.0296652	0.952844	0.0282663	0.155897
35	9.72222	9.72222	1	14.5833	1.5	0.819333	2.26899	0.3235	1.38196	0.305905	0.580177	0.177479		35	9.72222	9.72222	1	14.5833	1.5	3.61233	37.0524	3.1165	22.5673	0.0262795	0.957568	0.0251645	0.152315
36	10	10	1	15	1.5	0.944	2.57024	0.434	1.54342	0.280093	0.606828	0.169968		36	10	10	1	15	1.5	3.737	41.9719	3.227	25.2039	0.023271	0.961838	0.022383	0.147585
37	10.2778	10.2778	1	15.4167	1.5	1.06867	2.91149	0.5445	1.72375	0.255657	0.632859	0.161795		37	10.2778	10.2778	1	15.4167	1.5	3.86167	47.5445	3.3375	28.1487	0.0205996	0.965693	0.0198929	0.141902
38	10.5556	10.5556	1	15.8333	1.5	1.19333	3.29806	0.655	1.92514	0.232663	0.658136	0.153124		38	10.5556	10.5556	1	15.8333	1.5	3.98633	53.8571	3.448	31.4375	0.0182292	0.969171	0.0176672	0.135457
39	10.8333	10.8333	1	16.25	1.5	1.318	3.73594	0.7655	2.15007	0.211151	0.682547	0.144121		39	10.8333	10.8333	1	16.25	1.5	4.111	61.0077	3.5585	35.1105	0.016127	0.972307	0.0156804	0.12844
40	11.1111	11.1111	1	16.6667	1.5	1.44267	4.23197	0.876	2.40128	0.191133	0.705993	0.134938		40	11.1111	11.1111	1	16.6667	1.5	4.23567	69.1077	3.669	39.2127	0.0142638	0.975132	0.0139091	0.121029
41	11.3889	11.3889	1	17.0833	1.5	1.56733	4.79385	0.9865	2.68183	0.172597	0.728396	0.125719		41	11.3889	11.3889	1	17.0833	1.5	4.36033	78.2832	3.7795	43.7941	0.012613	0.977676	0.0123314	0.113387
42	11.6667	11.6667	1	17.5	1.5	1.692	5.43033	1.097	2.99517	0.155513	0.749698	0.116588		42	11.6667	11.6667	1	17.5	1.5	4.485	88.677	3.89	48.9109	0.0111511	0.979964	0.0109277	0.10566
43	11.9444	11.9444	1	17.9167	1.5	1.81667	6.15132	1.2075	3.34511	0.139834	0.769856	0.107652		43	11.9444	11.9444	1	17.9167	1.5	4.60967	100.451	4.0005	54.6255	0.00985701	0.982023	0.00967981	0.0979725
44	12.2222	12.2222	1	18.3333	1.5	1.94133	6.96804	1.318	3.73594	0.125501	0.788849	0.0990017		44	12.2222	12.2222	1	18.3333	1.5	4.73433	113.788	4.111	61.0077	0.00871174	0.983873	0.00857125	0.0904304
45	12.5	12.5	1	18.75	1.5	2.066	7.89319	1.4285	4.17244	0.112446	0.806667	0.0907062		45	12.5	12.5	1	18.75	1.5	4.859	128.895	4.2215	68.1356	0.00769851	0.985536	0.00758716	0.0831191
46	12.7778	12.7778	1	19.1667	1.5	2.19067	8.94117	1.539	4.65993	0.100592	0.823319	0.0828191		46	12.7778	12.7778	1	19.1667	1.5	4.98367	146.009	4.332	76.0963	0.00680232	0.987029	0.00671408	0.0761051
47	13.0556	13.0556	1	19.5833	1.5	2.31533	10.1283	1.6495	5.20438	0.089861	0.838823	0.0753775		47	13.0556	13.0556	1	19.5833	1.5	5.10833	165.394	4.4425	84.9871	0.00600982	0.98837	0.00593992	0.0694376
48	13.3333	13.3333	1	20	1.5	2.44	11.473	1.76	5.81244	0.0801729	0.85321	0.0684043		48	13.3333	13.3333	1	20	1.5	5.233	187.354	4.553	94.9167	0.00530915	0.989574	0.0052538	0.0631505
49	13.6111	13.6111	1	20.4167	1.5	2.56467	12.9963	1.8705	6.49154	0.0714473	0.866516	0.0619103		49	13.6111	13.6111	1	20.4167	1.5	5.35767	212.229	4.6635	106.006	0.00468979	0.990655	0.00464596	0.0572643
50	13.8889	13.8889	1	20.8333	1.5	2.68933	14.7219	1.981	7.24999	0.0636057	0.878788	0.0558959		50	13.8889	13.8889	1	20.8333	1.5	5.48233	240.407	4.774	118.392	0.00414238	0.991624	0.00410769	0.0517882
51	14.1667	14.1667	1	21.25	1.5	2.814	16.6765	2.0915	8.09705	0.0565723	0.890074	0.0503536		51	14.1667	14.1667	1	21.25	1.5	5.607	272.326	4.8845	132.224	0.00365863	0.992494	0.00363117	0.0467224
52	14.4444	14.4444	1	21.6667	1.5	2.93867	18.8906	2.202	9.04308	0.0502749	0.900429	0.045269		52	14.4444	14.4444	1	21.6667	1.5	5.73167	308.483	4.995	147.673	0.0032312	0.993274	0.00320946	0.0420595
53	14.7222	14.7222	1	22.0833	1.5	3.06333	21.3988	2.3125	10.0996	0.0446453	0.909907	0.0406231		53	14.7222	14.7222	1	22.0833	1.5	5.85633	349.441	5.1055	164.927	0.00285355	0.993973	0.00283635	0.0377867
54	15	15	1	22.5	1.5	3.188	24.2399	2.423	11.2796	0.0396198	0.918564	0.0363933		54	15	15	1	22.5	1.5	5.981	395.836	5.216	184.196	0.00251993	0.9946	0.00250633	0.033887
55	15.2778	15.2778	1	22.9167	1.5	3.31267	27.4582	2.5335	12.5975	0.0351392	0.926457	0.032555		55	15.2778	15.2778	1	22.9167	1.5	6.10567	448.391	5.3265	205.717	0.00222523	0.995162	0.00221447	0.0303405
56	15.5556	15.5556	1	23.3333	1.5	3.43733	31.1039	2.644	14.0694	0.0311489	0.93364	0.0290818		56	15.5556	15.5556	1	23.3333	1.5	6.23033	507.925	5.437	229.752	0.00196493	0.995666	0.00195641	0.0271254
57	15.8333	15.8333	1	23.75	1.5	3.562	35.2336	2.7545	15.7132	0.0275987	0.940167	0.0259474		57	15.8333	15.8333	1	23.75	1.5	6.355	575.362	5.5475	256.595	0.00173502	0.996118	0.00172828	0.0242191
58	16.1111	16.1111	1	24.1667	1.5	3.68667	39.9116	2.865	17.5491	0.024443	0.946089	0.0231252		58	16.1111	16.1111	1	24.1667	1.5	6.47967	651.754	5.658	286.575	0.00153197	0.996523	0.00152664	0.0215986
59	16.3889	16.3889	1	24.5833	1.5	3.81133	45.2107	2.9755	19.5994	0.02164	0.951455	0.0205895		59	16.3889	16.3889	1	24.5833	1.5	6.60433	738.288	5.7685	320.057	0.00135265	0.996885	0.00134844	0.0192411
60	16.6667	16.6667	1	25	1.5	3.936	51.2133	3.086	21.8893	0.0191522	0.956312	0.0183155		60	16.6667	16.6667	1	25	1.5	6.729	836.311	5.879	357.452	0.0011943	0.99721	0.00119097	0.0171245
61	16.9444	16.9444	1	25.4167	1.5	4.06067	58.013	3.1965	24.4468	0.0169454	0.960702	0.0162795		61	16.9444	16.9444	1	25.4167	1.5	6.85367	947.348	5.9895	399.215	0.00105447	0.997501	0.00105183	0.0152277
62	17.2222	17.2222	1	25.8333	1.5	4.18533	65.7154	3.307	27.3031	0.014989	0.964668	0.0144595		62	17.2222	17.2222	1	25.8333	1.5	6.97833	1073.13	6.1	445.858	0.000930987	0.997762	0.000928904	0.0135305
63	17.5	17.5	1	26.25	1.5	4.31	74.4405	3.4175	30.4931	0.0132555	0.968247	0.0128346		63	17.5	17.5	1	26.25	1.5	7.103	1215.61	6.2105	497.95	0.000821957	0.997996	0.00082031	0.0120143
64	17.7778	17.7778	1	26.6667	1.5	4.43467	84.324	3.528	34.0558	0.01172	0.971474	0.0113857		64	17.7778	17.7778	1	26.6667	1.5	7.22767	1377.01	6.321	556.129	0.000725686	0.998205	0.000724384	0.0106613
65	18.0556	18.0556	1	27.0833	1.5	4.55933	95.5198	3.6385	38.0347	0.0103606	0.974382	0.0100952		65	18.0556	18.0556	1	27.0833	1.5	7.35233	1559.83	6.4315	621.105	0.000640684	0.998393	0.000639654	0.0094555
66	18.3333	18.3333	1	27.5	1.5	4.684	108.202	3.749	42.4786	0.00915734	0.977	0.00894672		66	18.3333	18.3333	1	27.5	1.5	7.477	1766.93	6.542	693.673	0.000565633	0.99856	0.000564818	0.0083819
67	18.6111	18.6111	1	27.9167	1.5	4.80867	122.568	3.8595	47.4416	0.0080927	0.979357	0.00792564		67	18.6111	18.6111	1	27.9167	1.5	7.60167	2001.53	6.6525	774.719	0.000499369	0.998711	0.000498725	0.00742692
68	18.8889	18.8889	1	28.3333	1.5	4.93333	138.842	3.97	52.9845	0.00715095	0.981476	0.00701849		68	18.8889	18.8889	1	28.3333	1.5	7.72633	2267.27	6.763	865.234	0.000440864	0.998846	0.000440355	0.00657813
69	19.1667	19.1667	1	28.75	1.5	5.058	157.276	4.0805	59.175	0.00631809	0.983382	0.0062131		69	19.1667	19.1667	1	28.75	1.5	7.851	2568.3	6.8735	966.325	0.000389211	0.998966	0.000388809	0.00582429
70	19.4444	19.4444	1	29.1667	1.5	5.18267	178.157	4.191	66.0888	0.00558169	0.985094	0.00549849		70	19.4444	19.4444	1	29.1667	1.5	7.97567	2909.3	6.984	1079.23	0.000343608	0.999074	0.000343289	0.0051552
71	19.7222	19.7222	1	29.5833	1.5	5.30733	201.811	4.3015	73.8104	0.00493069	0.986633	0.00486478		71	19.7222	19.7222	1	29.5833	1.5	8.10033	3295.57	7.0945	1205.32	0.000303346	0.999171	0.000303094	0.00456169
72	20	20	1	30	1.5	5.432	228.606	4.412	82.4342	0.00435529	0.988015	0.00430309		72	20	20	1	30	1.5	8.225	3733.12	7.205	1346.14	0.000267801	0.999258	0.000267602	0.00403548
73	20.2778	20.2778	1	30.4167	1.5	5.55667	258.958	4.5225	92.0655	0.00384677	0.989255	0.00380544		73	20.2778	20.2778	1	30.4167	1.5	8.34967	4228.77	7.3155	1503.42	0.000236419	0.999335	0.000236262	0.00356918
74	20.5556	20.5556	1	30.8333	1.5	5.68133	293.34	4.633	102.822	0.00339743	0.990368	0.0033647		74	20.5556	20.5556	1	30.8333	1.5	8.47433	4790.23	7.426	1679.08	0.000208715	0.999405	0.000208591	0.00315611
75	20.8333	20.8333	1	31.25	1.5	5.806	332.287	4.7435	114.835	0.00300041	0.991367	0.00297451		75	20.8333	20.8333	1	31.25	1.5	8.599	5426.23	7.5365	1875.26	0.000184256	0.999467	0.000184158	0.00279035
76	21.1111	21.1111	1	31.6667	1.5	5.93067	376.405	4.854	128.252	0.00264967	0.992263	0.00262917		76	21.1111	21.1111	1	31.6667	1.5	8.72367	6146.68	7.647	2094.35	0.000162663	0.999523	0.000162585	0.00246659
77	21.3889	21.3889	1	32.0833	1.5	6.05533	426.381	4.9645	143.237	0.00233983	0.993067	0.00232361		77	21.3889	21.3889	1	32.0833	1.5	8.84833	6962.77	7.7575	2339.05	0.0001436	0.999573	0.000143539	0.00218007
78	21.6667	21.6667	1	32.5	1.5	6.18	482.992	5.075	159.972	0.00206615	0.993788	0.00205331		78	21.6667	21.6667	1	32.5	1.5	8.973	7887.23	7.868	2612.34	0.000126771	0.999617	0.000126723	0.00192659
79	21.9444	21.9444	1	32.9167	1.5	6.30467	547.119	5.1855	178.663	0.00182442	0.994434	0.00181427		79	21.9444	21.9444	1	32.9167	1.5	9.09767	8934.42	7.9785	2917.55	0.000111914	0.999657	0.000111876	0.00170239
80	22.2222	22.2222	1	33.3333	1.5	6.42933	619.761	5.296	199.537	0.00161093	0.995013	0.00160289		80	22.2222	22.2222	1	33.3333	1.5	9.22233	10120.7	8.089	3258.43	9.87981e-05	0.999693	9.87678e-05	0.00150413
81	22.5	22.5	1	33.75	1.5	6.554	702.047	5.4065	222.85	0.00142238	0.995533	0.00141603		81	22.5	22.5	1	33.75	1.5	9.347	11464.4	8.1995	3639.13	8.72191e-05	0.999725	8.71951e-05	0.00132883
82	22.7778	22.7778	1	34.1667	1.5	6.67867	795.258	5.517	248.887	0.00125587	0.995998	0.00125085		82	22.7778	22.7778	1	34.1667	1.5	9.47167	12986.5	8.31	4064.31	7.6997e-05	0.999754	7.69781e-05	0.00117387
83	23.0556	23.0556	1	34.5833	1.5	6.80333	900.845	5.6275	277.966	0.00110884	0.996415	0.00110486		83	23.0556	23.0556	1	34.5833	1.5	9.59633	14710.7	8.4205	4539.17	6.79729e-05	0.99978	6.79579e-05	0.00103691
[truncated: 1,819 more rows]
